# Supplementary material
Source: PubMed Central journal article supplement (PMC4153350)

**TRIPHOSGENE-AMINE BASE PROMOTED CHLORINATION OF UNACTIVATED  
ALIPHATIC ALCOHOLS**

Andrés Villalpando, Caitlan E. Ayala, Christopher B. Watson, and Rendy Kartika\*

Department of Chemistry  
232 Choppin Hall  
Louisiana State University  
Baton Rouge, Louisiana 70803, USA

email: rkartika@lsu.edu

**SUPPORTING INFORMATION**

|                                                        |      |
|--------------------------------------------------------|------|
| 1. GC-MS Studies.....                                  | S-2  |
| 2. <sup>1</sup> H and <sup>13</sup> C NMR Spectra..... | S-22 |

## Gas Chromatography – Mass Spectrometry Study

The following table indicates the relevant peaks in the GC-MS studies. The table lists retention time and the corresponding compounds for each peak. Mass spectra of each compound are also included.

| Retention Time (min) | Compounds                                                                                       |
|----------------------|-------------------------------------------------------------------------------------------------|
| 3.75                 | Et <sub>3</sub> N                                                                               |
| 4.69                 | Pyridine                                                                                        |
| 5.18                 | Toluene                                                                                         |
| 9.57 <sup>a</sup>    | 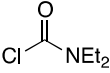               |
| 11.67                | <br><b>3</b>  |
| 11.99                | <br><b>5</b> |
| 14.31                | <br><b>4</b> |
| 18.27                | <br><b>6</b> |

<sup>a</sup> Discussion on the formation of diethylcarbamoyl chloride, see: Ayala, C. E.; Villalpando, A.; Nguyen, A. L.; McCandless, G. T.; Kartika, R. *Org. Lett.* **2012**, *14*, 3676-3679.

**Retention time: 3.75 minutes (triethylamine)**

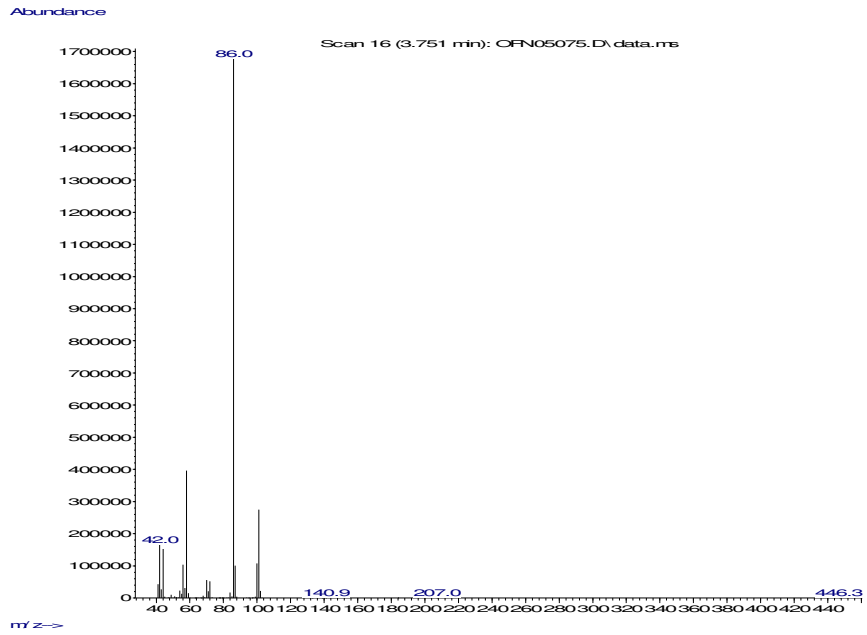

**Retention time: 4.69 minutes (pyridine)**

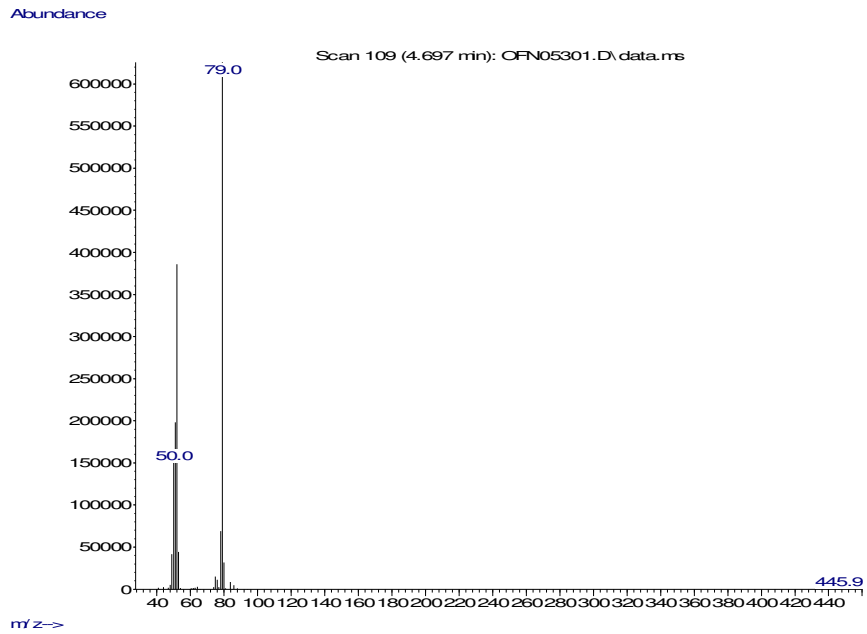

**Retention time: 5.18 minutes (toluene)**

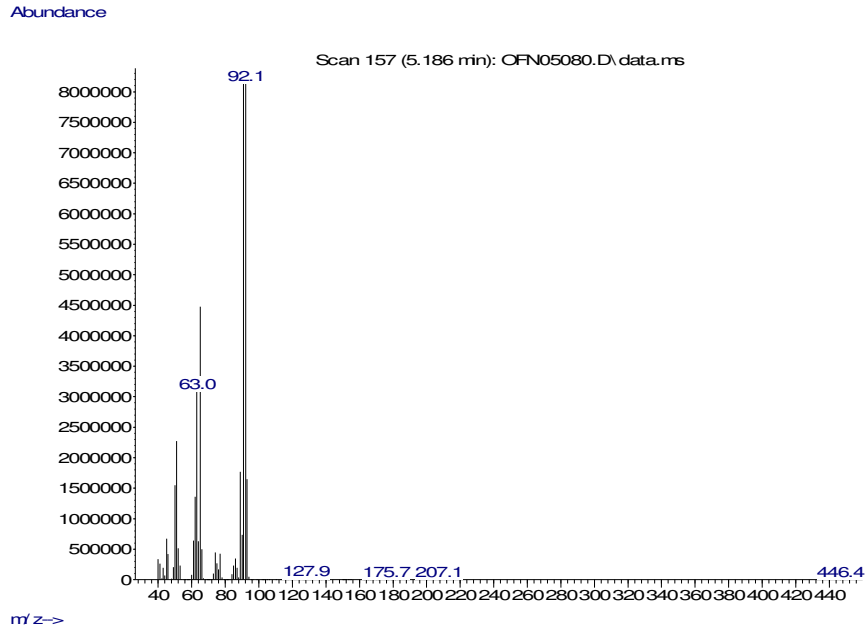

**Retention time: 9.57 minutes (diethylcarbamic chloride)**

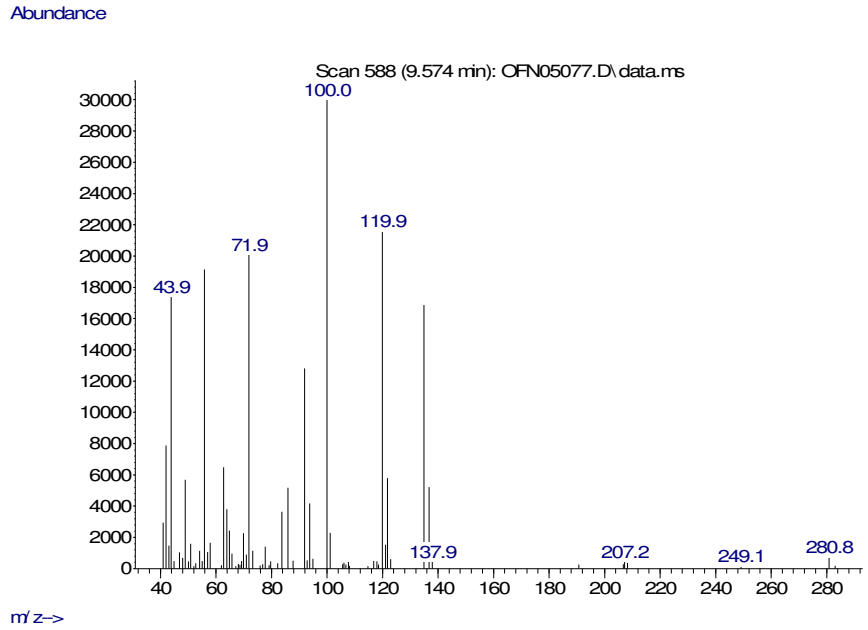

**Retention time: 11.67 minutes ((R)-1-phenylpropan-2-ol 3)**

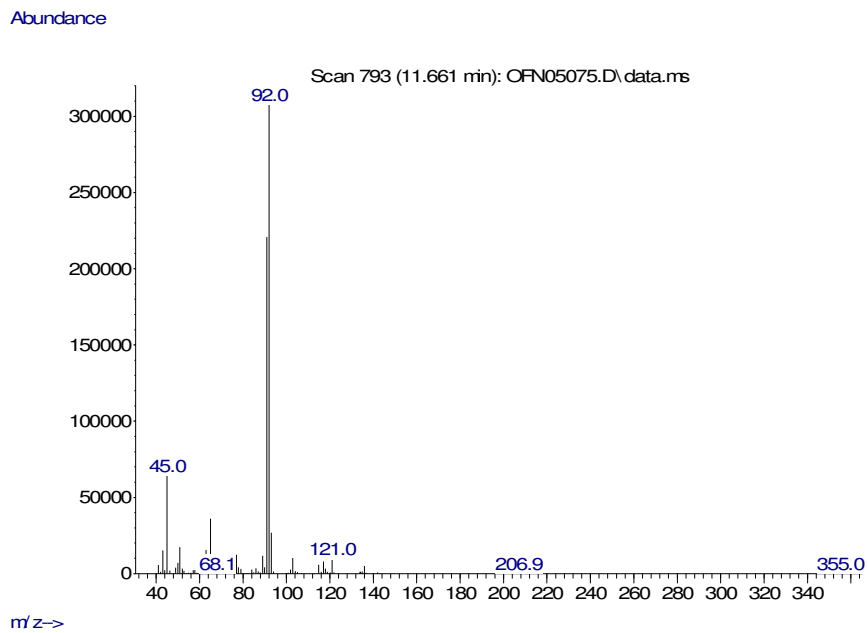

**Retention time: 11.99 minutes ((S)-(2-chloropropyl)benzene 5)**

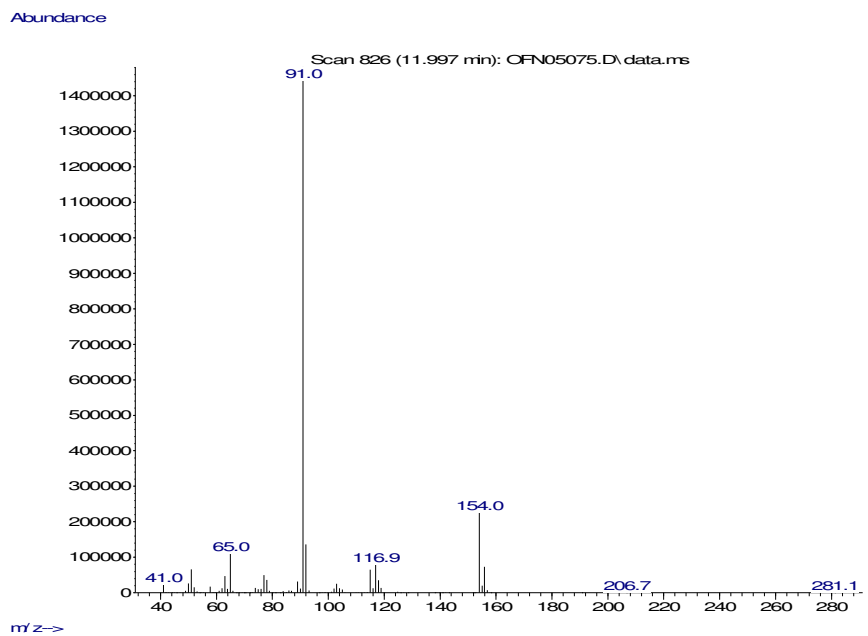

**Retention time: 14.31 minutes ((R)-1-phenylpropan-2-yl carbonochloridate 4)**

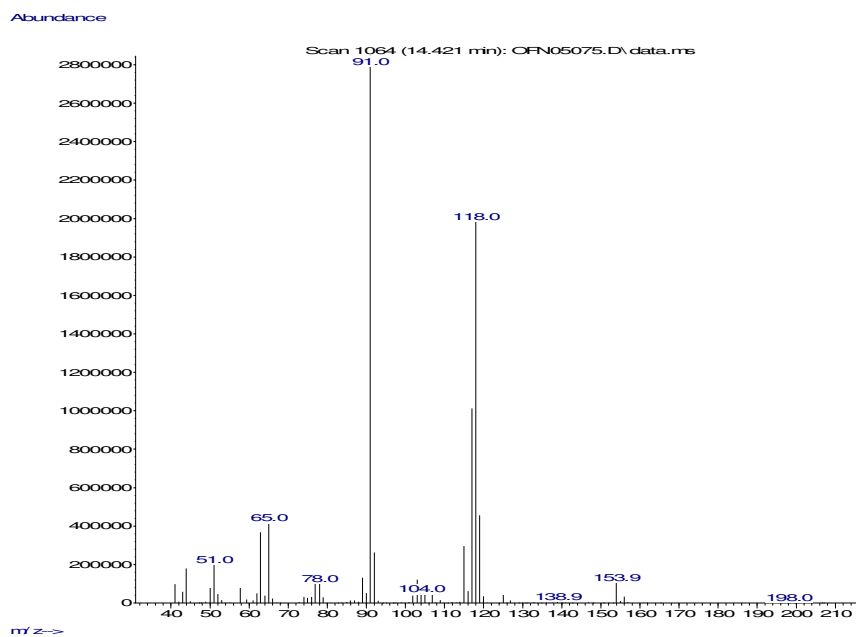

**Retention time: 18.27 minutes ((R)-1-phenylpropan-2-yl diethylcarbamate 6)**

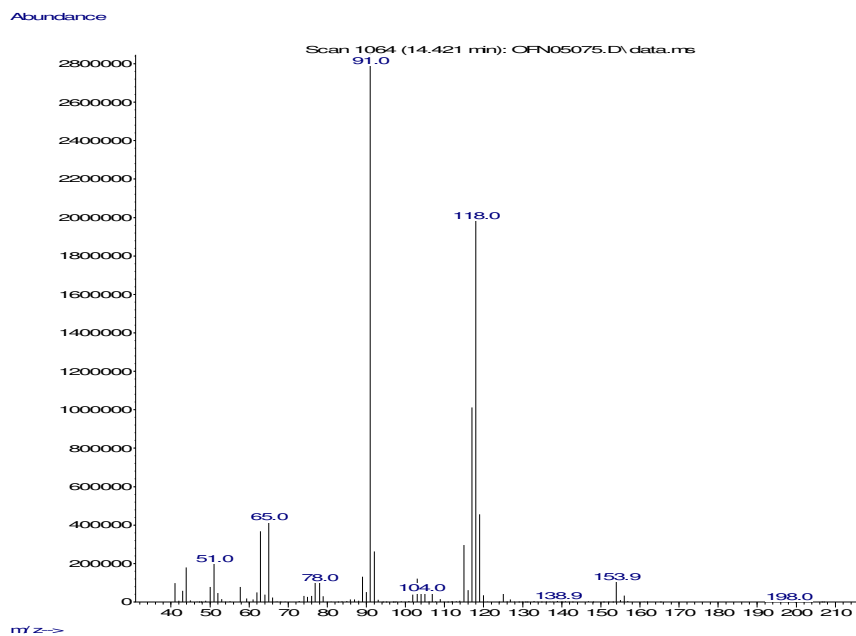

**GC-MS Study #1:** Effect of Triethylamine Equivalence in the Triphosgene-Amine Base Chlorination Reaction.

*Protocol:* Alcohol **3** (68.1 mg, 0.50 mmol) was dissolved in 3.75 mL of CH<sub>2</sub>Cl<sub>2</sub> (entries 1-5) or toluene (entries 6-10) inside a pressure vessel. The indicated amount of triethylamine was added to the solution and allowed to stir for 5 minutes. Triphosgene (74.2 mg, 0.25 mmol) was added to the reaction mixture. The vessel was sealed, and the reaction was allowed to stir at room temperature. After stirring for 3 hours, a small aliquot was taken out and diluted with CH<sub>2</sub>Cl<sub>2</sub>. The sample was then directly injected to the GC-MS instrument without further workup.

**Table 1.** Optimization Study with Varying the amount of Triethylamine

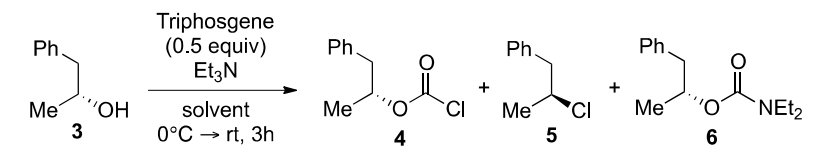

| entry | equiv Et <sub>3</sub> N | solvent                         | yield <b>3</b> <sup>(a)</sup> | yield <b>4</b> <sup>(a)</sup> | yield <b>5</b> <sup>(a)</sup> | yield <b>6</b> <sup>(a)</sup> |
|-------|-------------------------|---------------------------------|-------------------------------|-------------------------------|-------------------------------|-------------------------------|
| 1     | 1.00                    | CH <sub>2</sub> Cl <sub>2</sub> | 6%                            | 73%                           | 14%                           | 7%                            |
| 2     | 1.25                    | CH <sub>2</sub> Cl <sub>2</sub> | 3%                            | 75%                           | 13%                           | 9%                            |
| 3     | 1.50                    | CH <sub>2</sub> Cl <sub>2</sub> | 2%                            | 45%                           | 27%                           | 27%                           |
| 4     | 1.75                    | CH <sub>2</sub> Cl <sub>2</sub> | 1%                            | 16%                           | 44%                           | 39%                           |
| 5     | 2.00                    | CH <sub>2</sub> Cl <sub>2</sub> | 0%                            | 3%                            | 51%                           | 46%                           |
| 6     | 1.00                    | toluene                         | 11%                           | 86%                           | 3%                            | 0%                            |
| 7     | 1.25                    | toluene                         | 3%                            | 87%                           | 5%                            | 5%                            |
| 8     | 1.50                    | toluene                         | 2%                            | 87%                           | 6%                            | 5%                            |
| 9     | 1.75                    | toluene                         | 1%                            | 54%                           | 18%                           | 27%                           |
| 10    | 2.00                    | toluene                         | 2%                            | 65%                           | 21%                           | 13%                           |

<sup>a</sup> Yields were determined by GC-MS analysis of the crude mixtures assuming that these compounds elicited identical GC responses.

**Entry 1:** CH<sub>2</sub>Cl<sub>2</sub>, 1.00 equivalent of triethylamine (70 μL, 0.50 mmol)

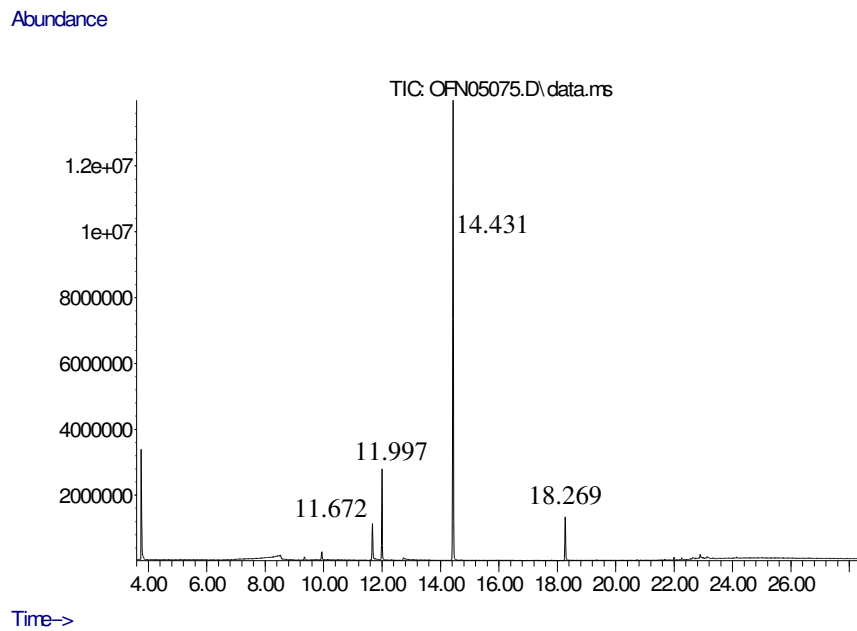

**Entry 2:** CH<sub>2</sub>Cl<sub>2</sub>, 1.25 equivalent of triethylamine (87 μL, 0.63 mmol)

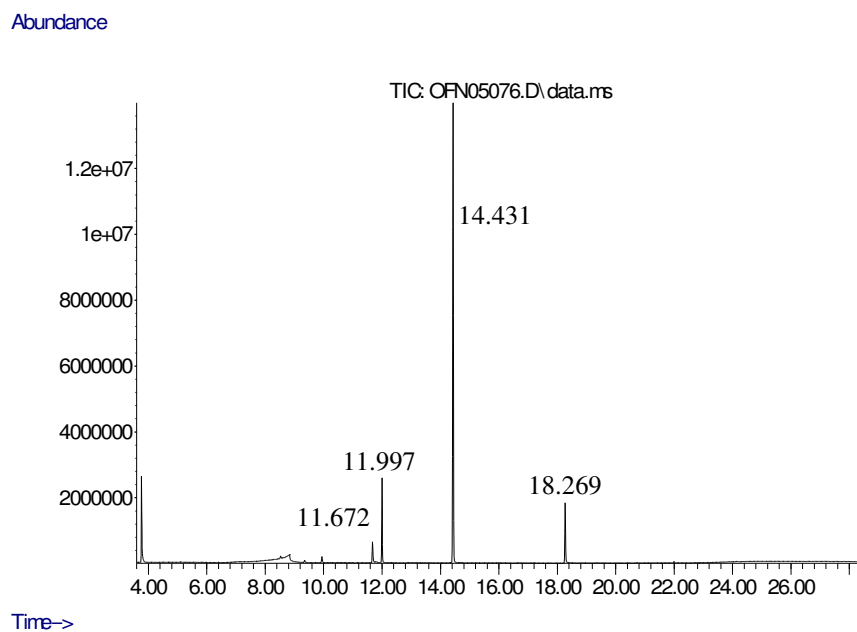



**Entry 3:** CH<sub>2</sub>Cl<sub>2</sub>, 1.50 equivalent of triethylamine (105 μL, 0.75 mmol)

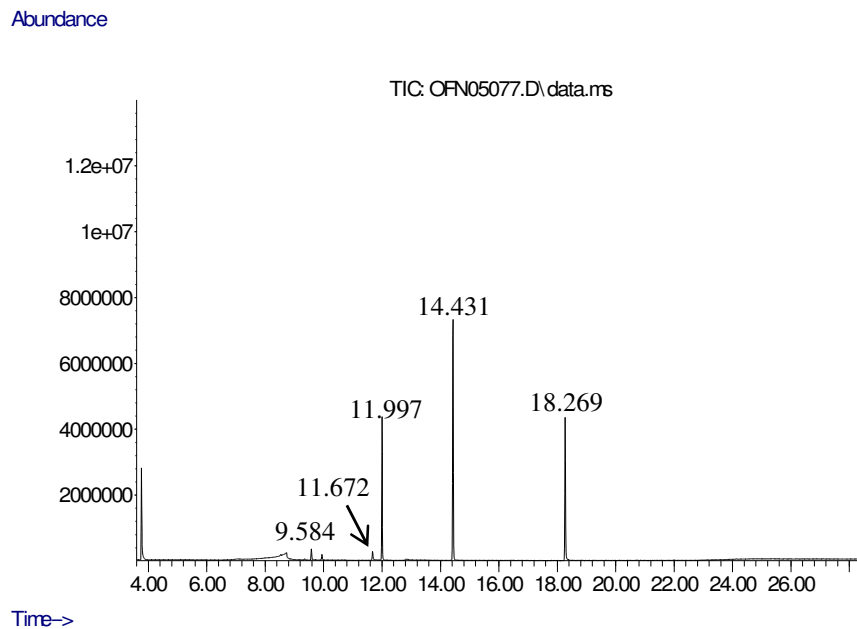

**Entry 4:** CH<sub>2</sub>Cl<sub>2</sub>, 1.75 equivalent of triethylamine (122 μL, 0.88 mmol)

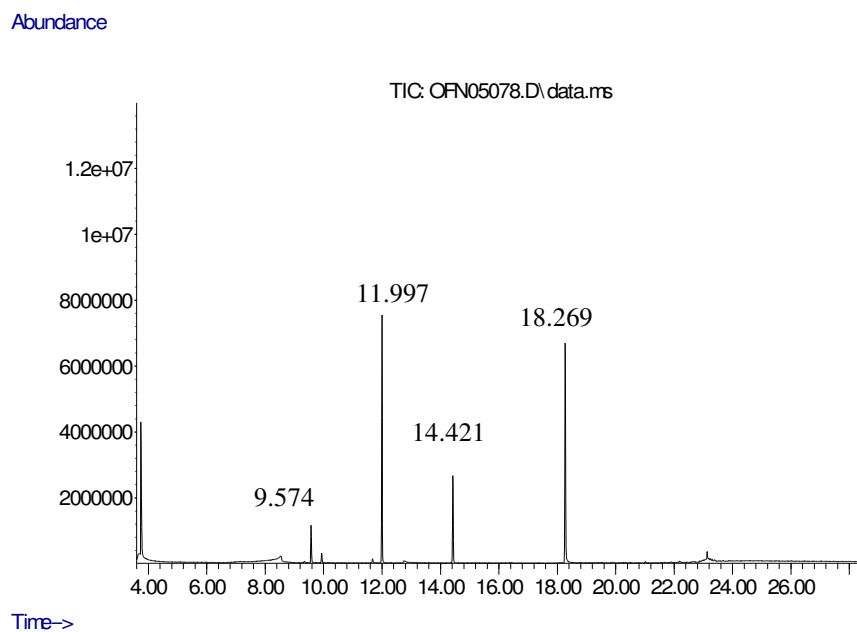

**Entry 5:** CH<sub>2</sub>Cl<sub>2</sub>, 2.00 equivalent of triethylamine (139 μL, 1.00 mmol)

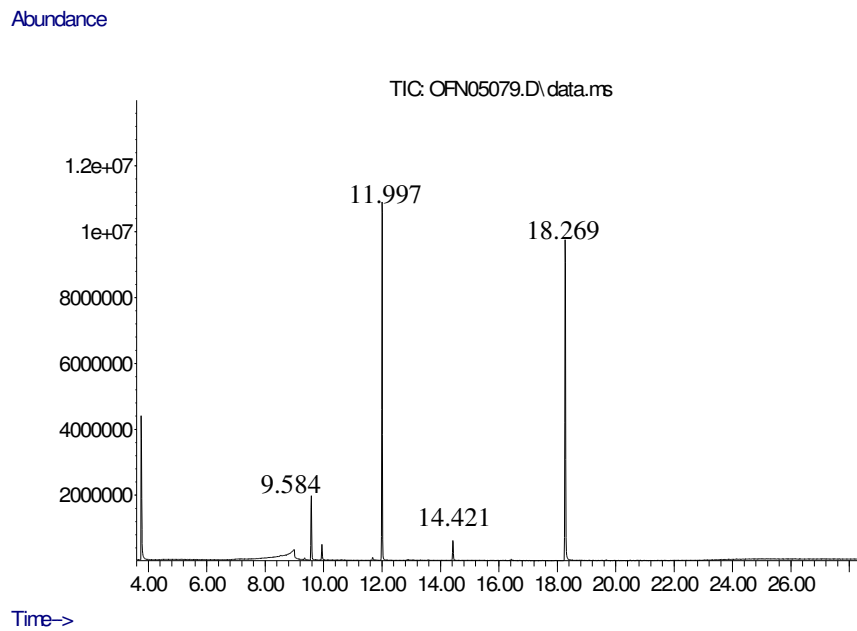

**Entry 6:** Toluene, 1.00 equivalent of triethylamine (70 μL, 0.50 mmol)

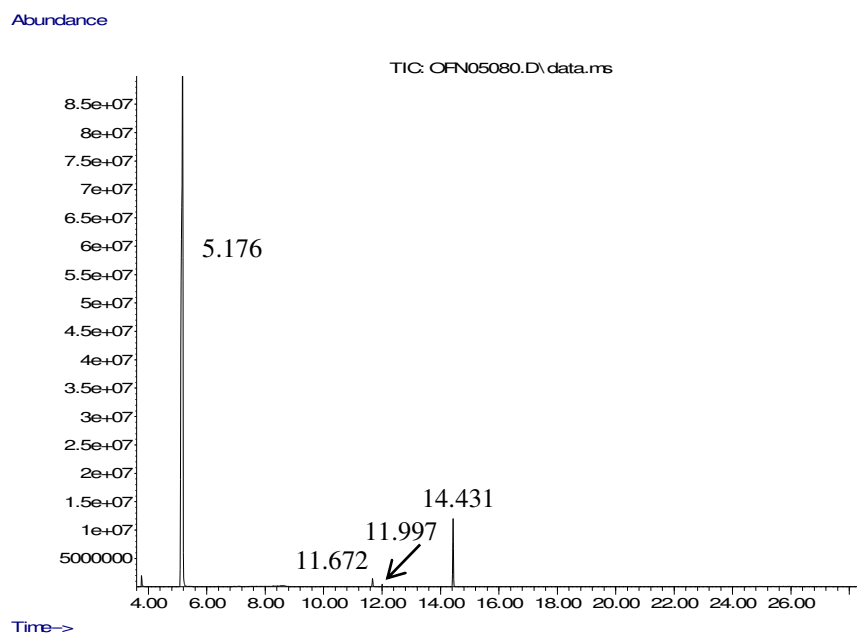

**Entry 7:** Toluene, 1.25 equivalent of triethylamine (87  $\mu$ L, 0.63 mmol)

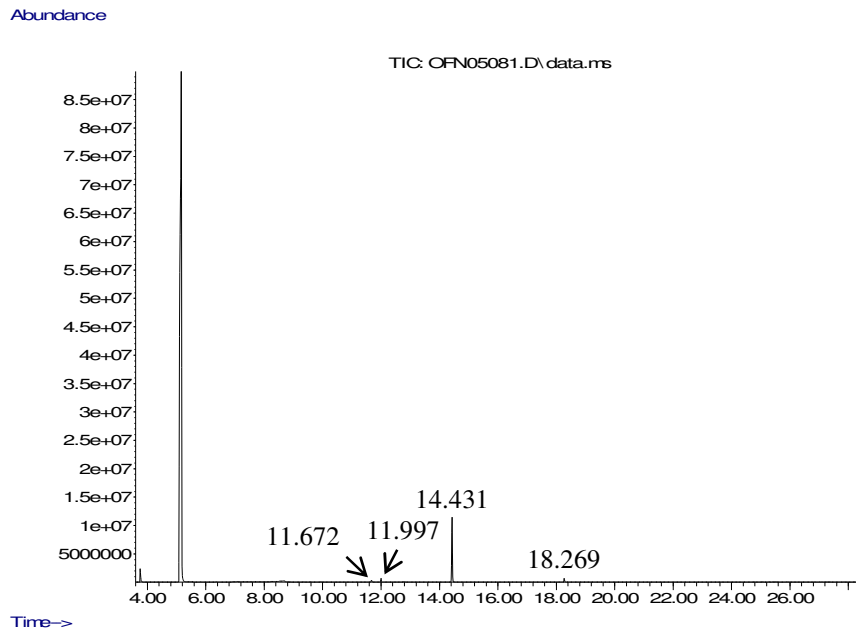

**Entry 8:** Toluene, 1.50 equivalent of triethylamine (105  $\mu$ L, 0.75 mmol)

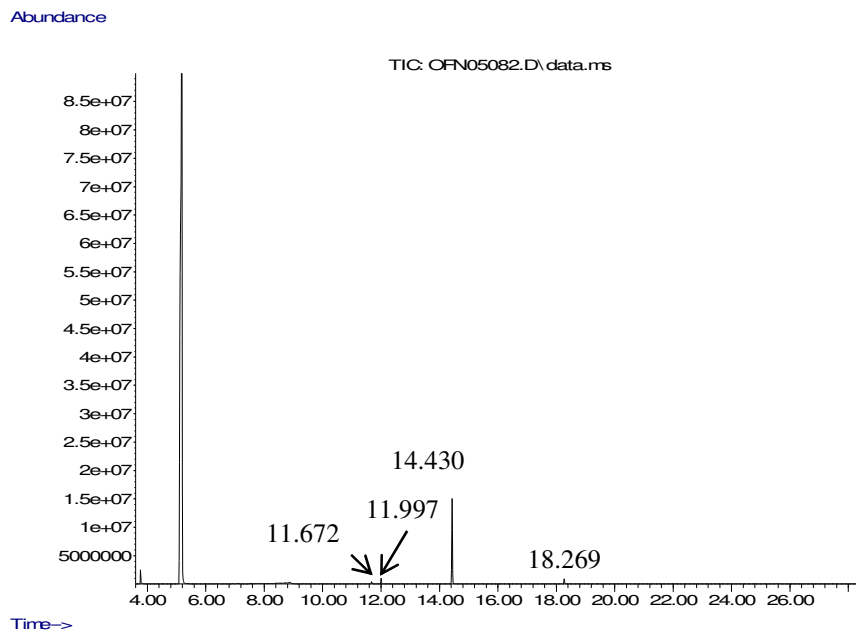

**Entry 9:** Toluene, 1.75 equivalent of triethylamine (122  $\mu$ L, 0.88 mmol)

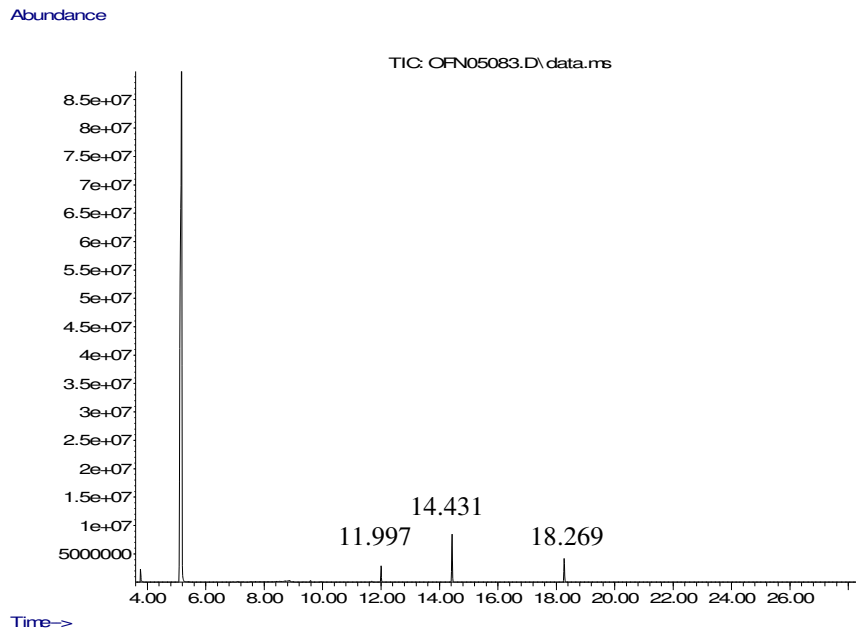

**Entry 10:** Toluene, 2.00 equivalent of triethylamine (139  $\mu$ L, 1.00 mmol)

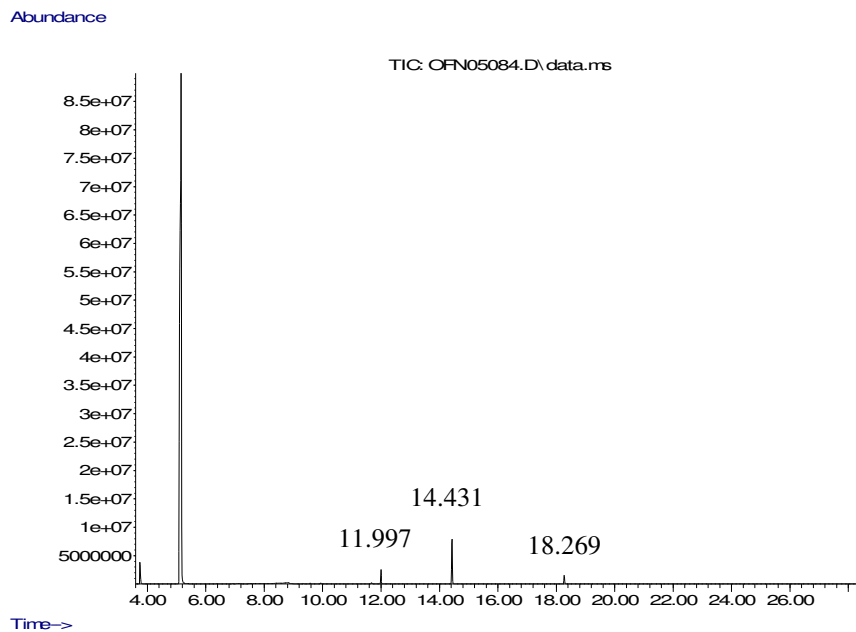

**GC-MS Study #2:** Effect of Triethylamine-Pyridine Mixture in the Triphosgene-Amine Base Chlorination Reaction.

*Protocol:* Alcohol **3** (68.1 mg, 0.50 mmol) was dissolved in 3.75 mL of CH<sub>2</sub>Cl<sub>2</sub> inside a pressure vessel. The indicated amount of triethylamine and pyridine was added to the solution and allowed to stir for 5 minutes. Triphosgene (74.2 mg, 0.25 mmol) was added to the reaction mixture. The vessel was sealed, and the reaction was allowed to stir either at room temperature (entries 1-4, 9-12) or in a heating bath at 40°C (entries 5-8, 13-16). After stirring for 6 hours, a small aliquot was taken out and diluted with CH<sub>2</sub>Cl<sub>2</sub>. The sample was then directly injected to the GC-MS instrument without further workup.

**Table 2.** Optimization Study with Mixed Amine Base Systems

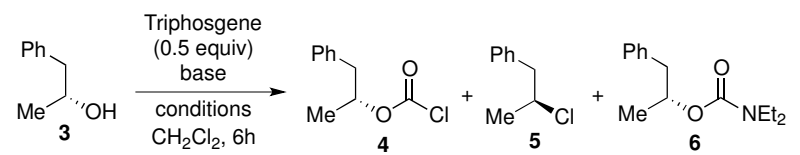

| entry | equiv Py | equiv Et <sub>3</sub> N | conditions <sup>(a)</sup> | yield <b>3</b> <sup>(b)</sup> | yield <b>4</b> <sup>(b)</sup> | yield <b>5</b> <sup>(b)</sup> | yield <b>6</b> <sup>(b)</sup> |
|-------|----------|-------------------------|---------------------------|-------------------------------|-------------------------------|-------------------------------|-------------------------------|
| 1     | 1.2      | 0.25                    | 0 °C → rt                 | 0%                            | 98%                           | 1%                            | 1%                            |
| 2     | 1.2      | 0.50                    | 0 °C → rt                 | 0%                            | 75%                           | 25%                           | 0%                            |
| 3     | 1.2      | 0.75                    | 0 °C → rt                 | 0%                            | 60%                           | 39%                           | 0%                            |
| 4     | 1.2      | 1.00                    | 0 °C → rt                 | 0%                            | 50%                           | 50%                           | 0%                            |
| 5     | 1.2      | 0.25                    | 0 °C → reflux             | 0%                            | 34%                           | 66%                           | 0%                            |
| 6     | 1.2      | 0.50                    | 0 °C → reflux             | 0%                            | 9%                            | 90%                           | 1%                            |
| 7     | 1.2      | 0.75                    | 0 °C → reflux             | 0%                            | 0%                            | 100%                          | 0%                            |
| 8     | 1.2      | 1.00                    | 0 °C → reflux             | 0%                            | 1%                            | 90%                           | 9%                            |
| 9     | 1.0      | 0                       | 0 °C → rt                 | 93%                           | 0%                            | 7%                            | 0%                            |
| 10    | 1.2      | 0                       | 0 °C → rt                 | 75%                           | 0%                            | 25%                           | 0%                            |
| 11    | 1.7      | 0                       | 0 °C → rt                 | 35%                           | 0%                            | 65%                           | 0%                            |
| 12    | 2.2      | 0                       | 0 °C → rt                 | 28%                           | 0%                            | 72%                           | 0%                            |
| 13    | 1.0      | 0                       | 0 °C → reflux             | 69%                           | 0%                            | 31%                           | 0%                            |
| 14    | 1.2      | 0                       | 0 °C → reflux             | 0%                            | 44%                           | 56%                           | 0%                            |
| 15    | 1.7      | 0                       | 0 °C → reflux             | 2%                            | 0%                            | 98%                           | 0%                            |
| 16    | 2.2      | 0                       | 0 °C → reflux             | 0%                            | 0%                            | 100%                          | 0%                            |

<sup>a</sup> Reagents were added at 0°C then the reaction mixture was warmed to room temperature or reflux. <sup>b</sup> Yields were determined by GC-MS analysis of the crude mixtures assuming that these compounds elicited identical GC responses.

**Entry 1:** Room temperature, 1.2 equivalent of pyridine (48  $\mu\text{L}$ , 0.60 mmol) and 0.25 equivalent of triethylamine (17  $\mu\text{L}$ , 0.13 mmol)

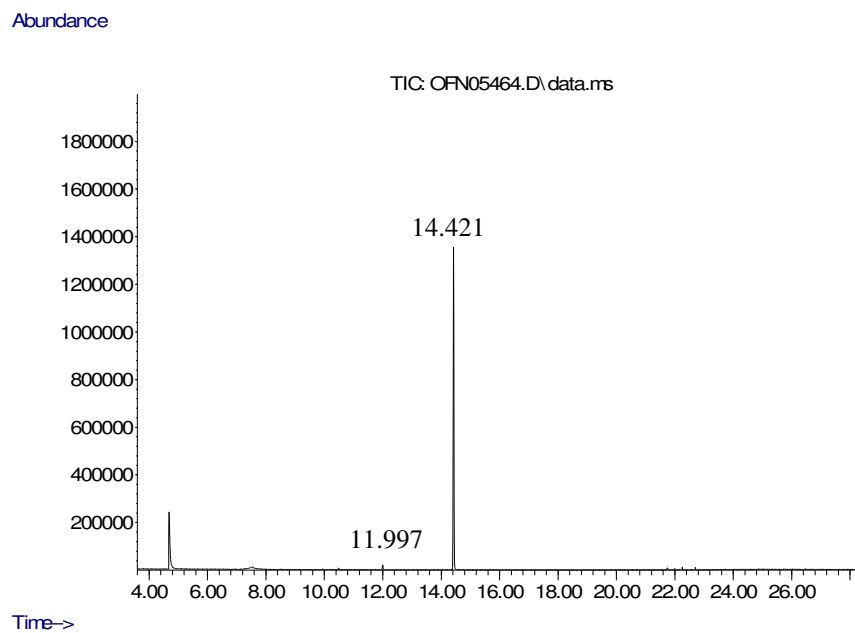

**Entry 2:** Room temperature, 1.2 equivalent of pyridine (48  $\mu\text{L}$ , 0.60 mmol) and 0.50 equivalent of triethylamine (35  $\mu\text{L}$ , 0.25 mmol)

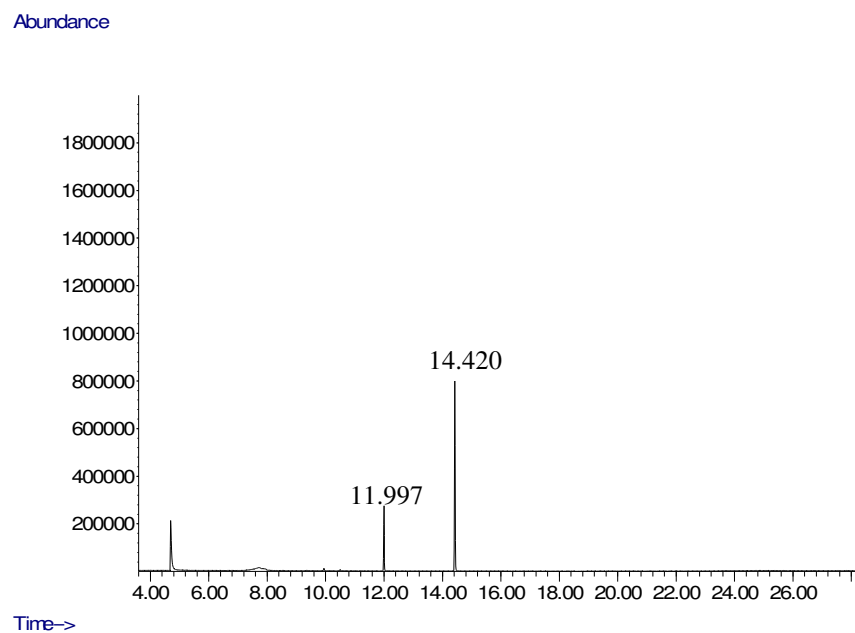

**Entry 3:** Room temperature, 1.2 equivalent of pyridine (48  $\mu$ L, 0.60 mmol) and 0.75 equivalent of triethylamine (52  $\mu$ L, 0.38 mmol)

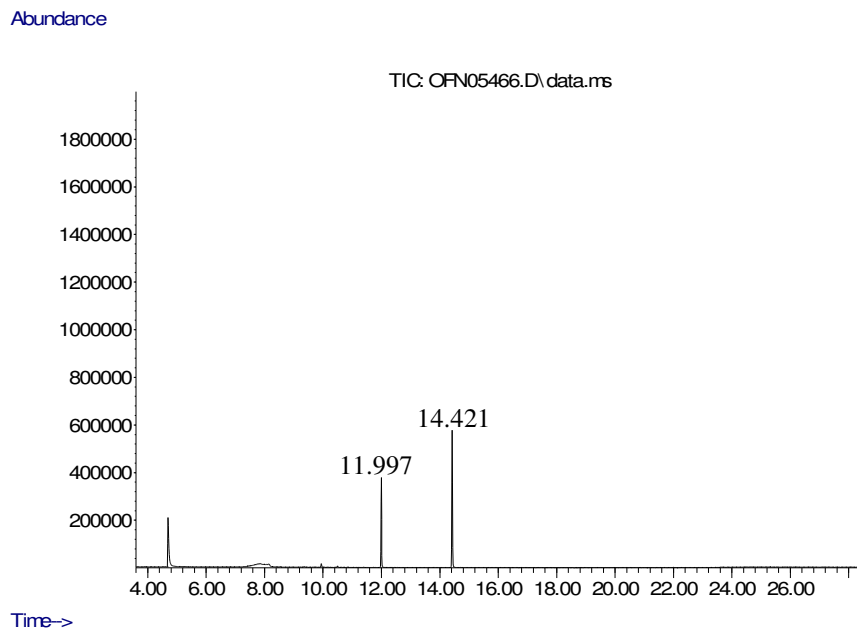

**Entry 4:** Room temperature, 1.2 equivalent of pyridine (48  $\mu$ L, 0.60 mmol) and 1.00 equivalent of triethylamine (52  $\mu$ L, 0.38 mmol)

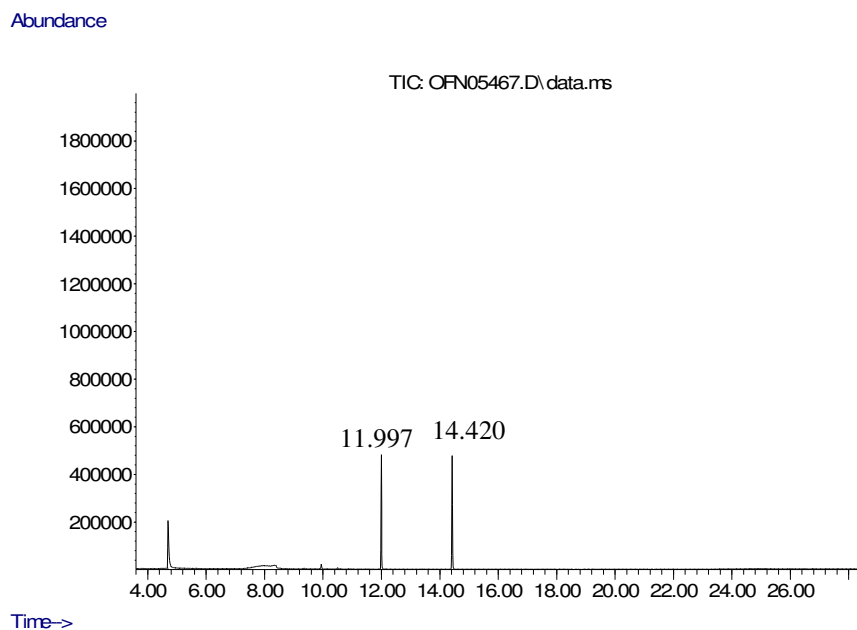

**Entry 5:** Reflux, 1.2 equivalent of pyridine (48  $\mu\text{L}$ , 0.60 mmol) and 0.25 equivalent of triethylamine (17  $\mu\text{L}$ , 0.13 mmol)

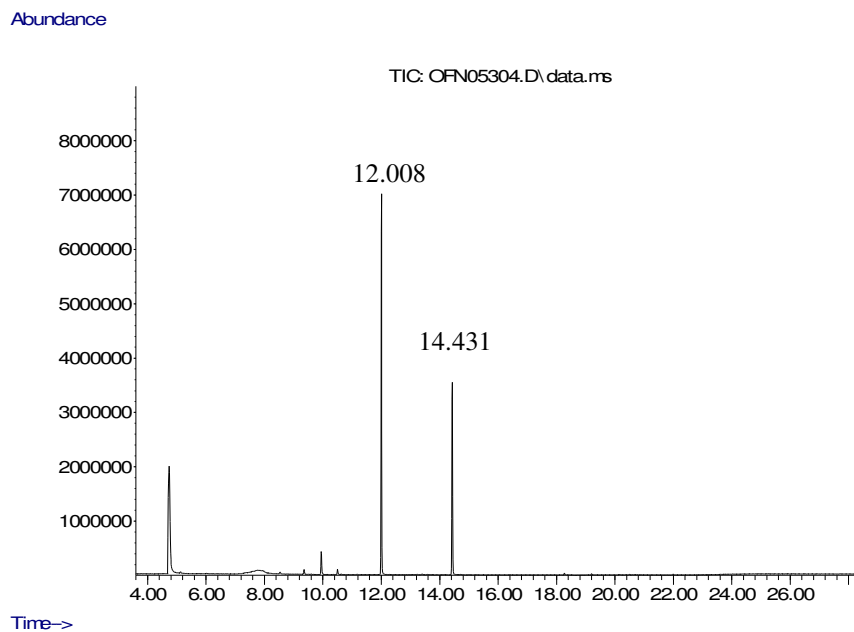

**Entry 6:** Reflux, 1.2 equivalent of pyridine (48  $\mu\text{L}$ , 0.60 mmol) and 0.50 equivalent of triethylamine (35  $\mu\text{L}$ , 0.25 mmol)

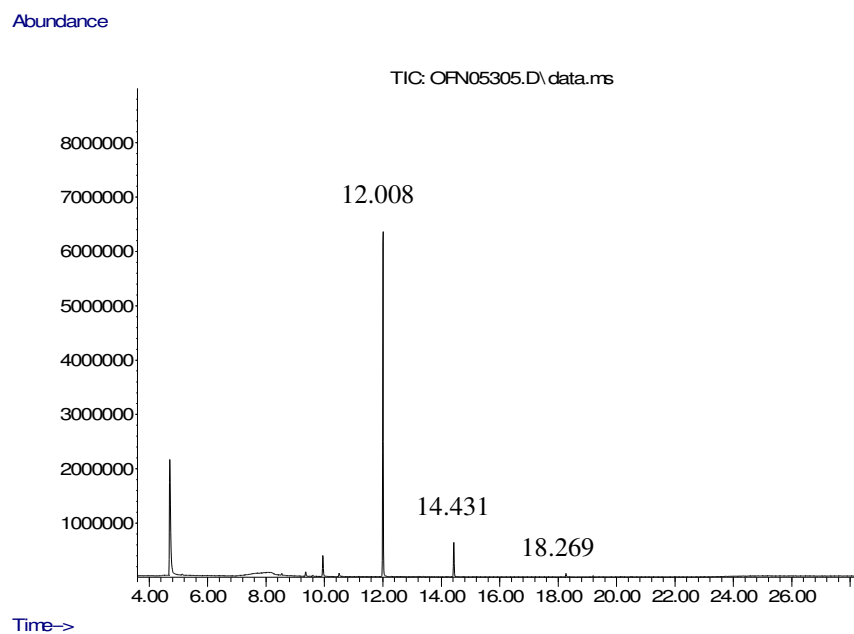



**Entry 7:** Reflux, 1.2 equivalent of pyridine (48  $\mu\text{L}$ , 0.60 mmol) and 0.75 equivalent of triethylamine (52  $\mu\text{L}$ , 0.38 mmol)

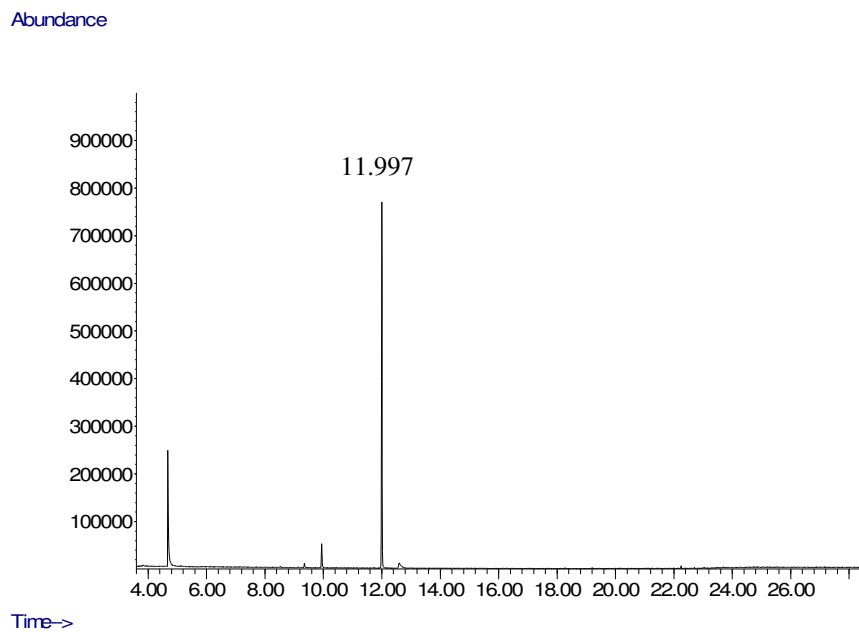

**Entry 8:** Reflux, 1.2 equivalent of pyridine (48  $\mu\text{L}$ , 0.60 mmol) and 1.00 equivalent of triethylamine (52  $\mu\text{L}$ , 0.38 mmol)

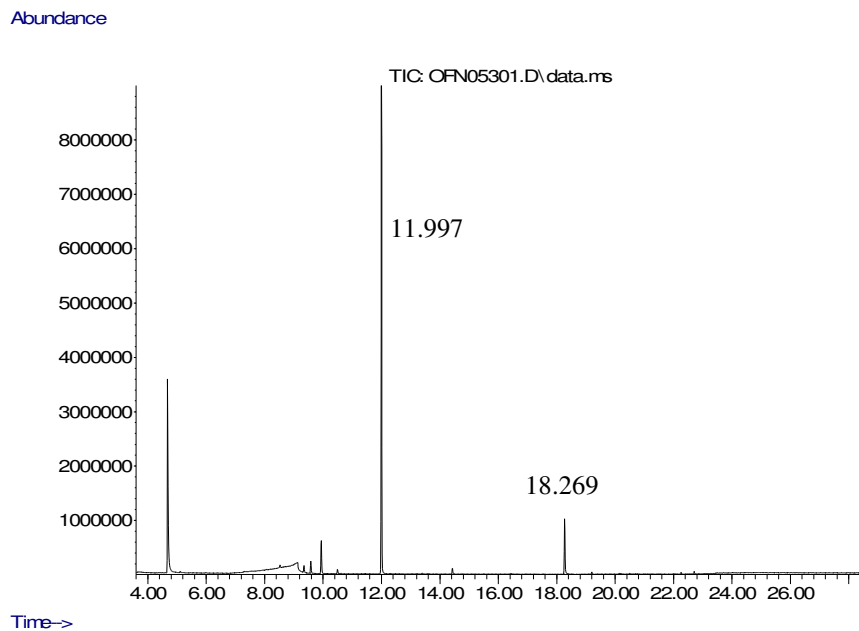

**Entry 9:** Room temperature, 1.0 equivalent of pyridine (40  $\mu$ L, 0.50 mmol)

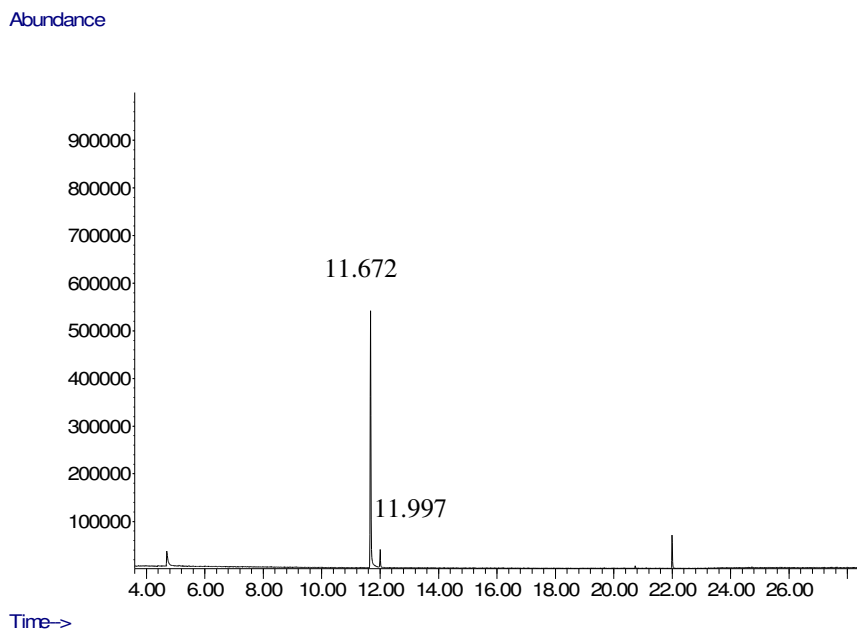

**Entry 10:** Room temperature, 1.2 equivalent of pyridine (48  $\mu$ L, 0.60 mmol)

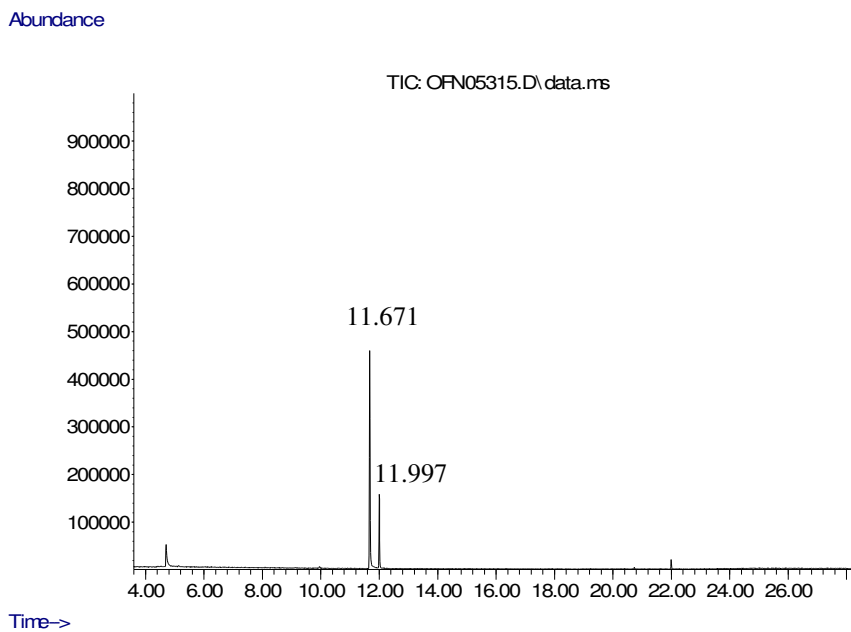

**Entry 11:** Room temperature, 1.7 equivalent of pyridine (48  $\mu\text{L}$ , 0.60 mmol)

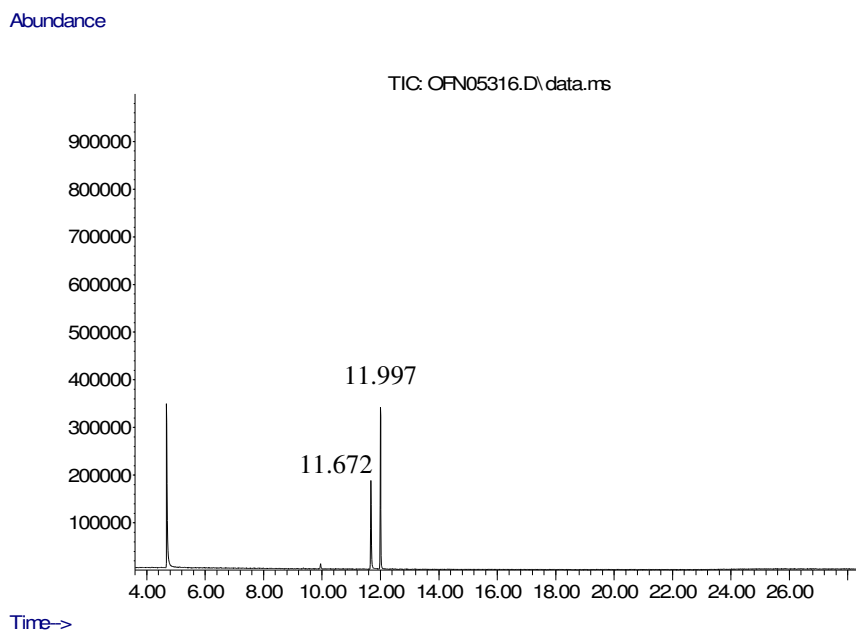

**Entry 12:** Room temperature, 2.2 equivalent of pyridine (89  $\mu\text{L}$ , 1.10 mmol)

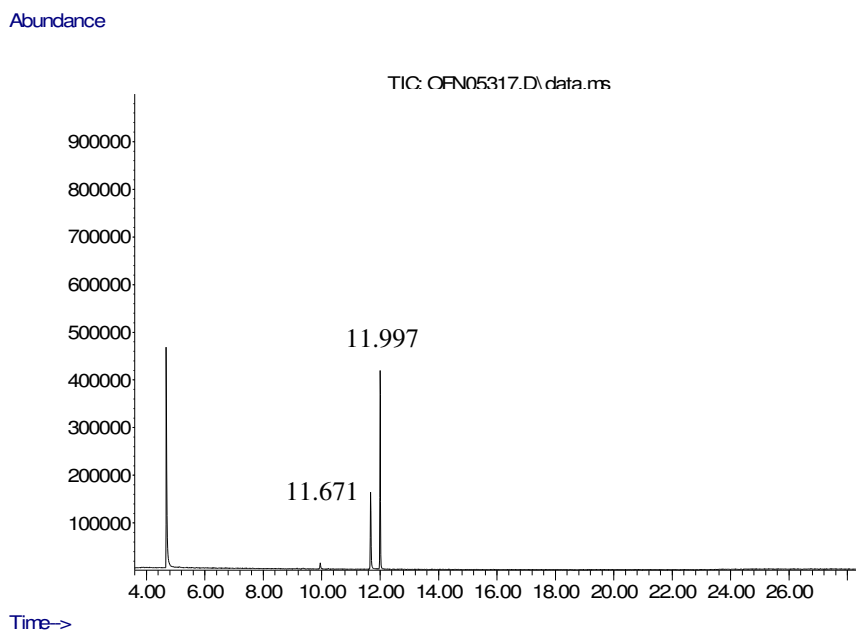

**Entry 13:** Reflux, 1.0 equivalent of pyridine (40  $\mu$ L, 0.50 mmol)

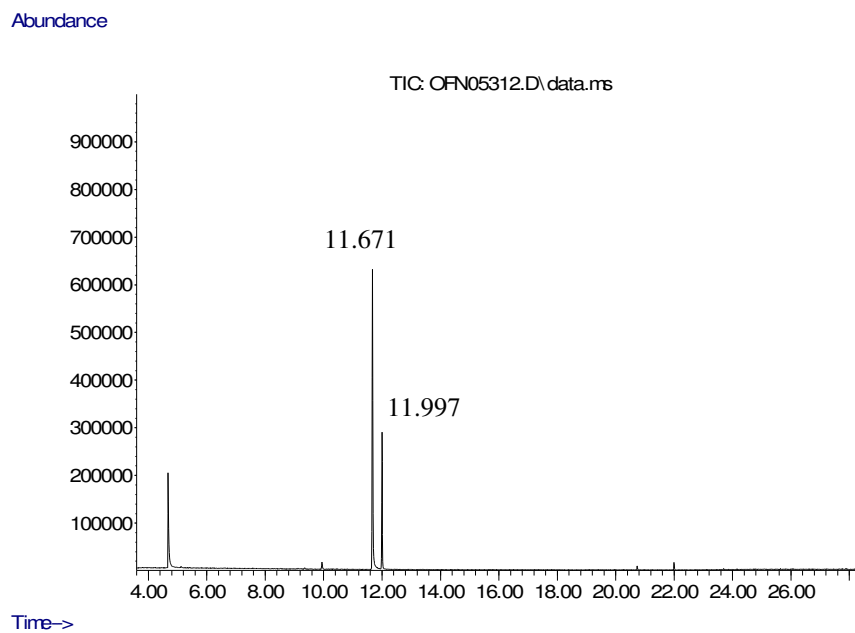

**Entry 14:** Reflux, 1.2 equivalent of pyridine (48  $\mu$ L, 0.60 mmol)

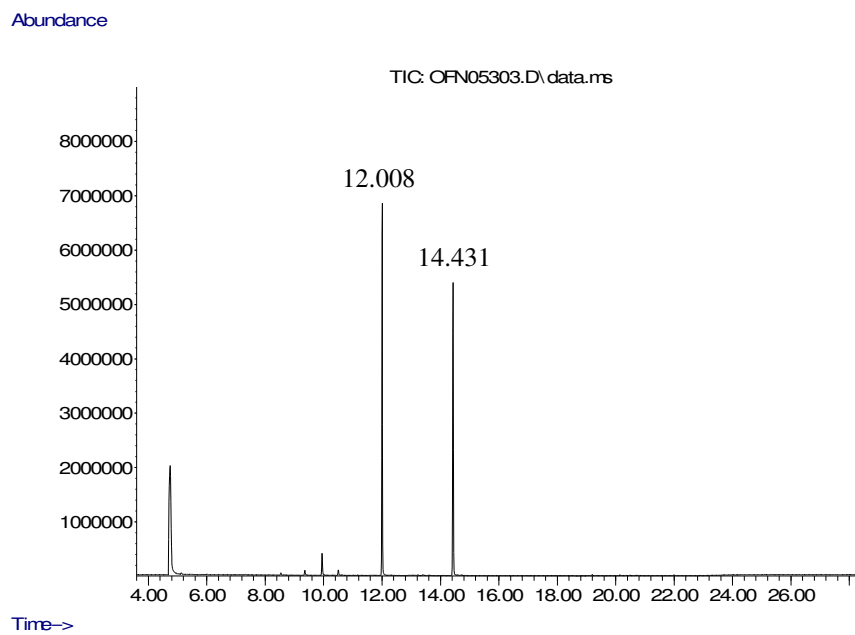

**Entry 15:** Room temperature, 1.7 equivalent of pyridine (48  $\mu$ L, 0.60 mmol)

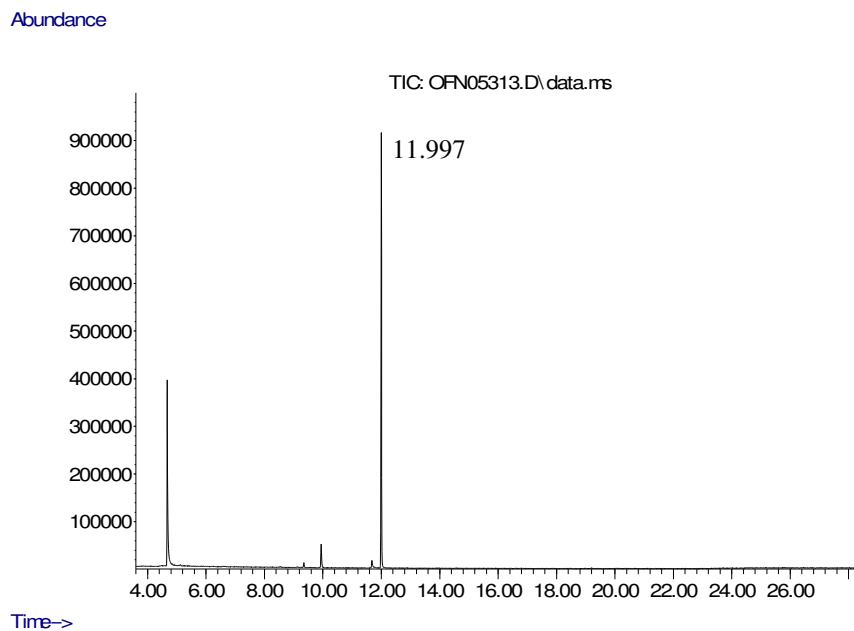

**Entry 16:** Room temperature, 2.2 equivalent of pyridine (89  $\mu$ L, 1.10 mmol)

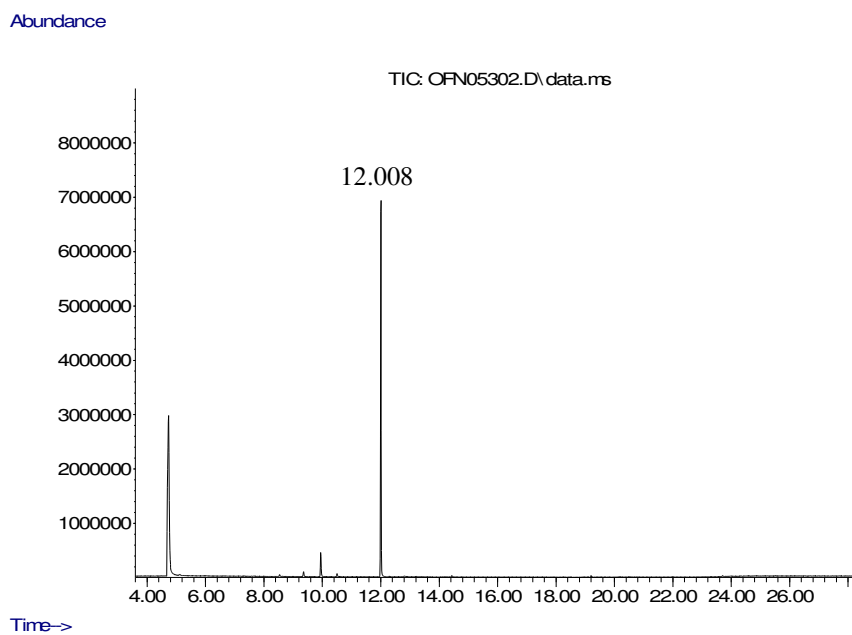

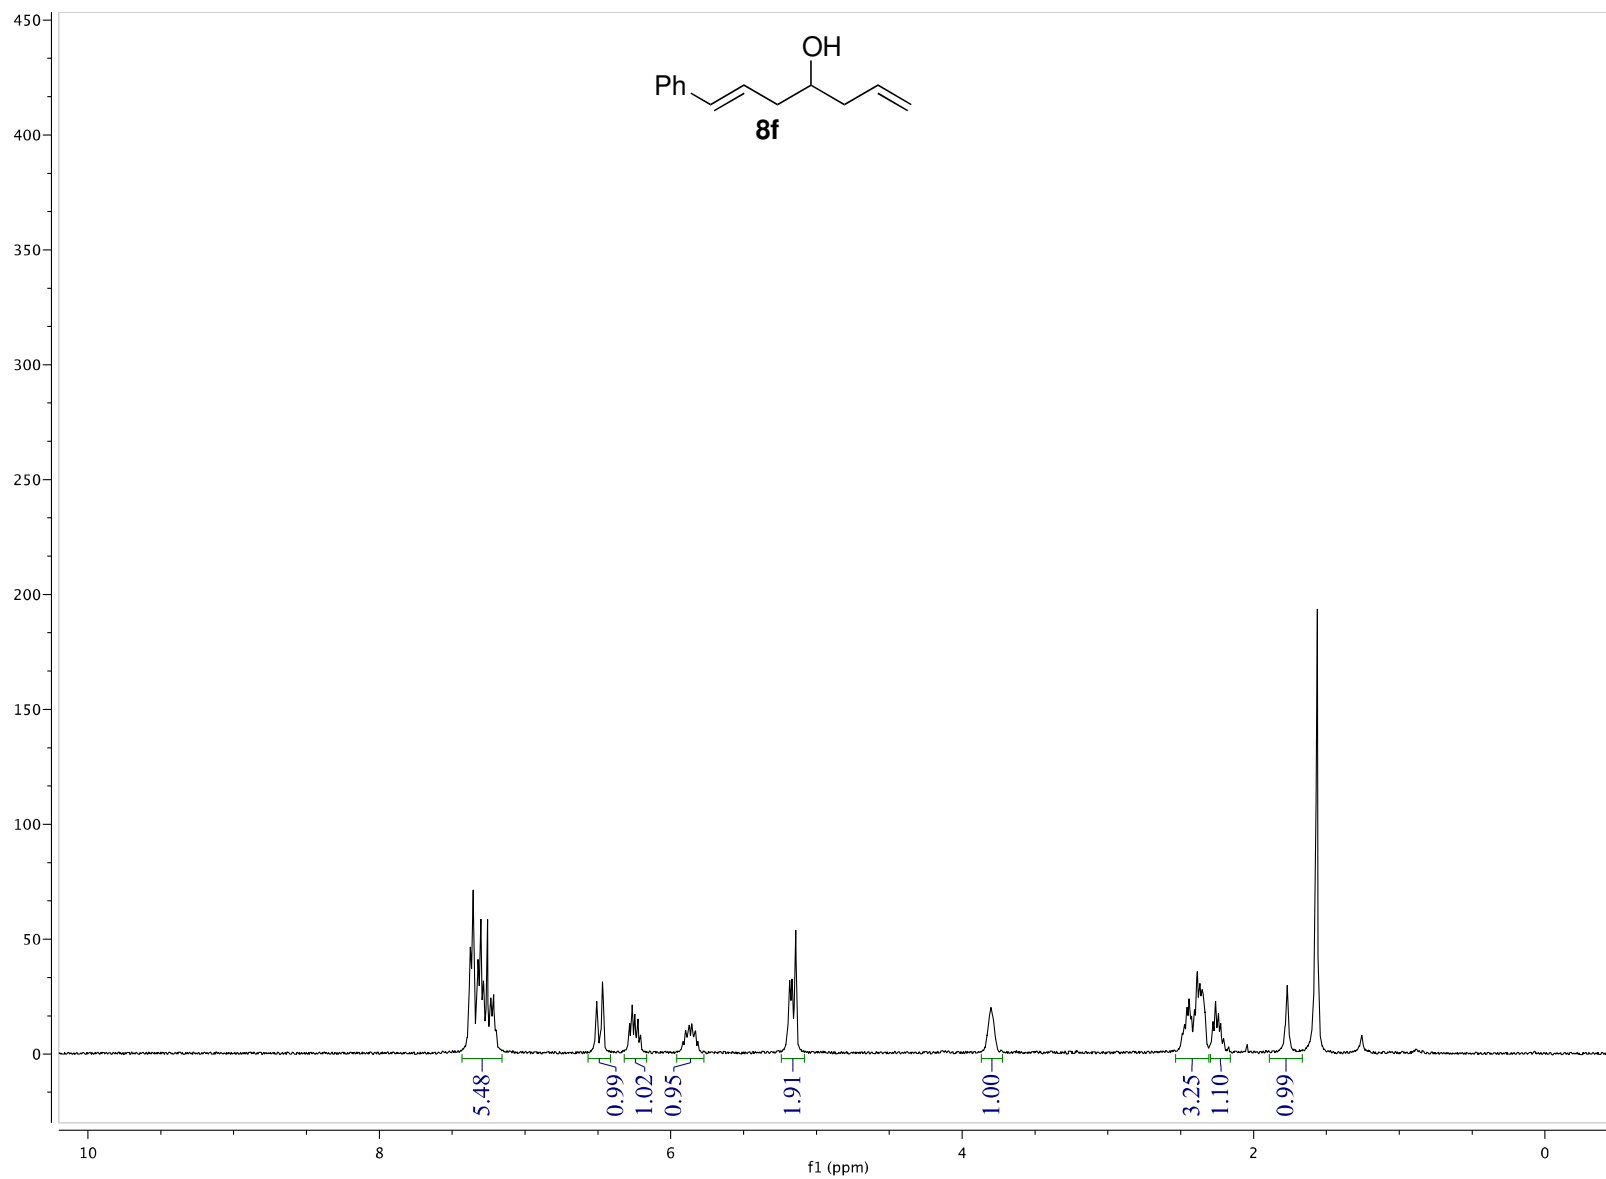

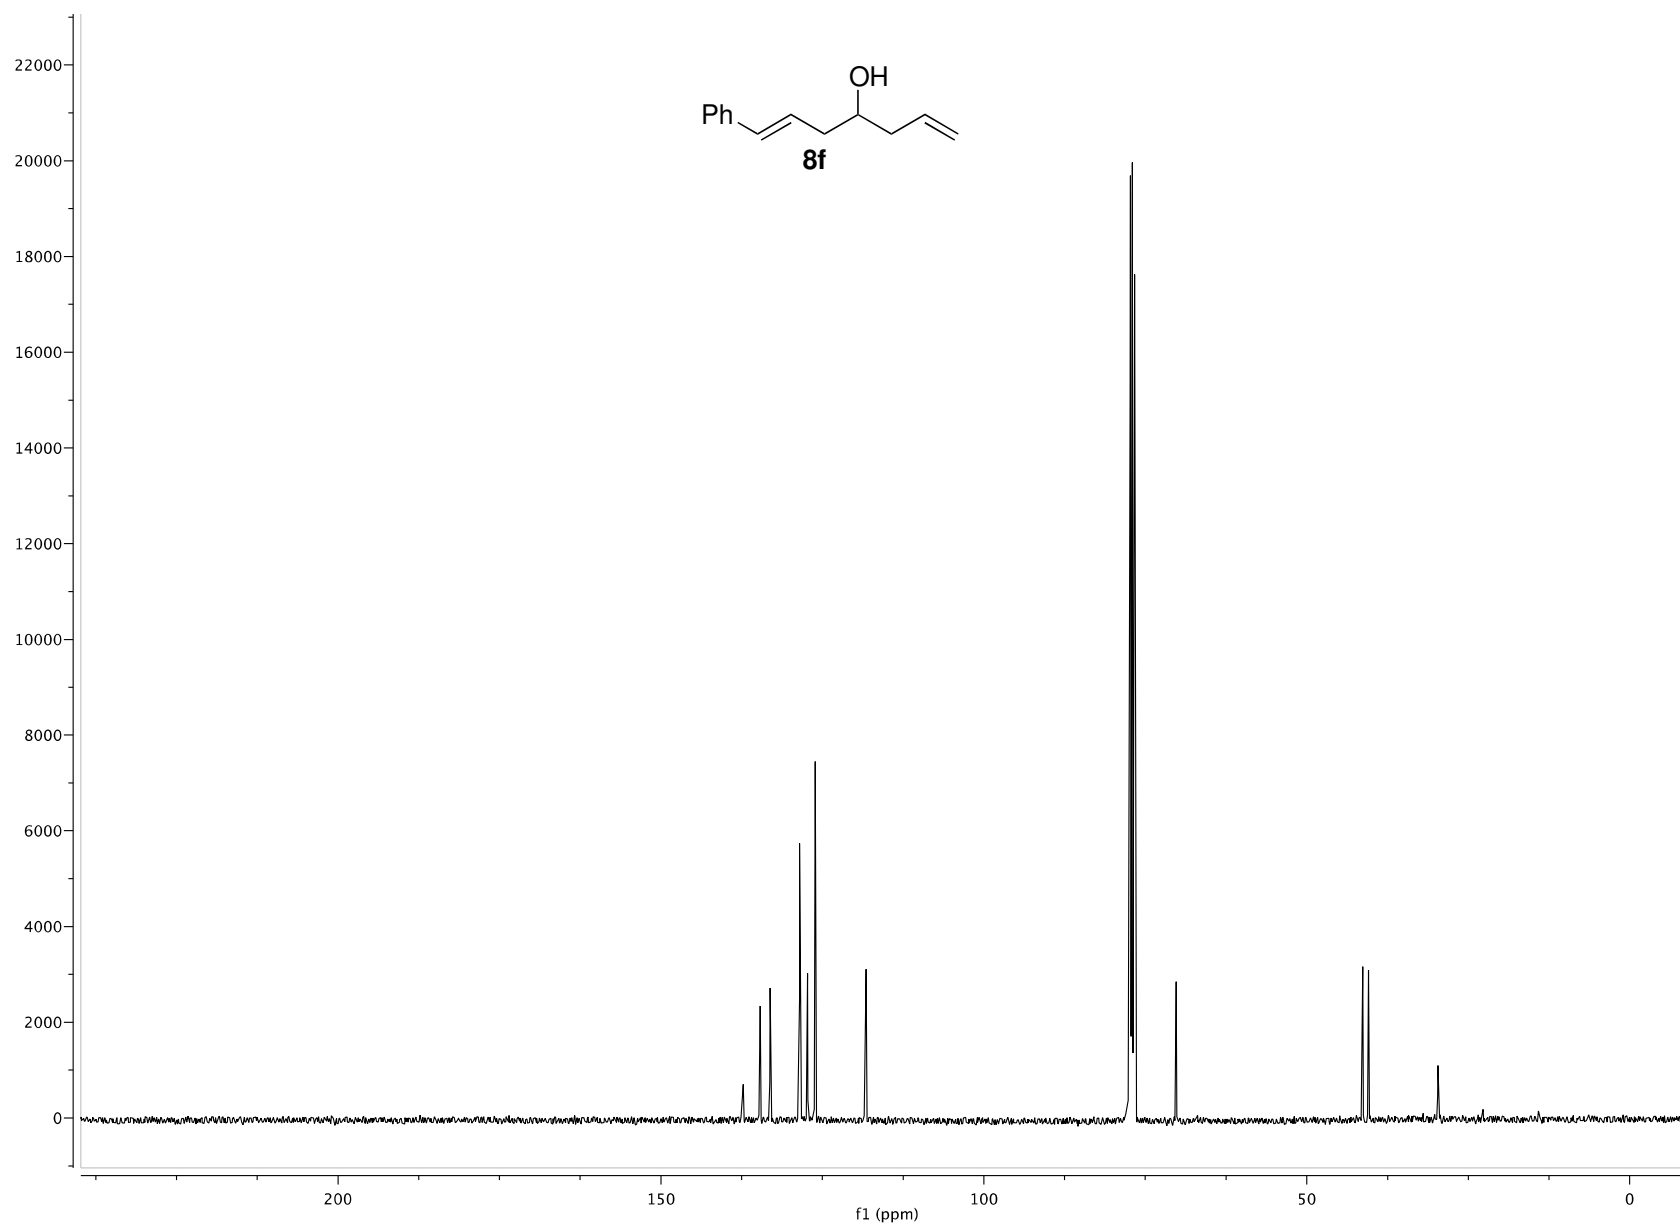

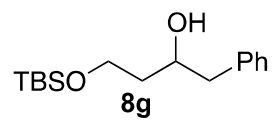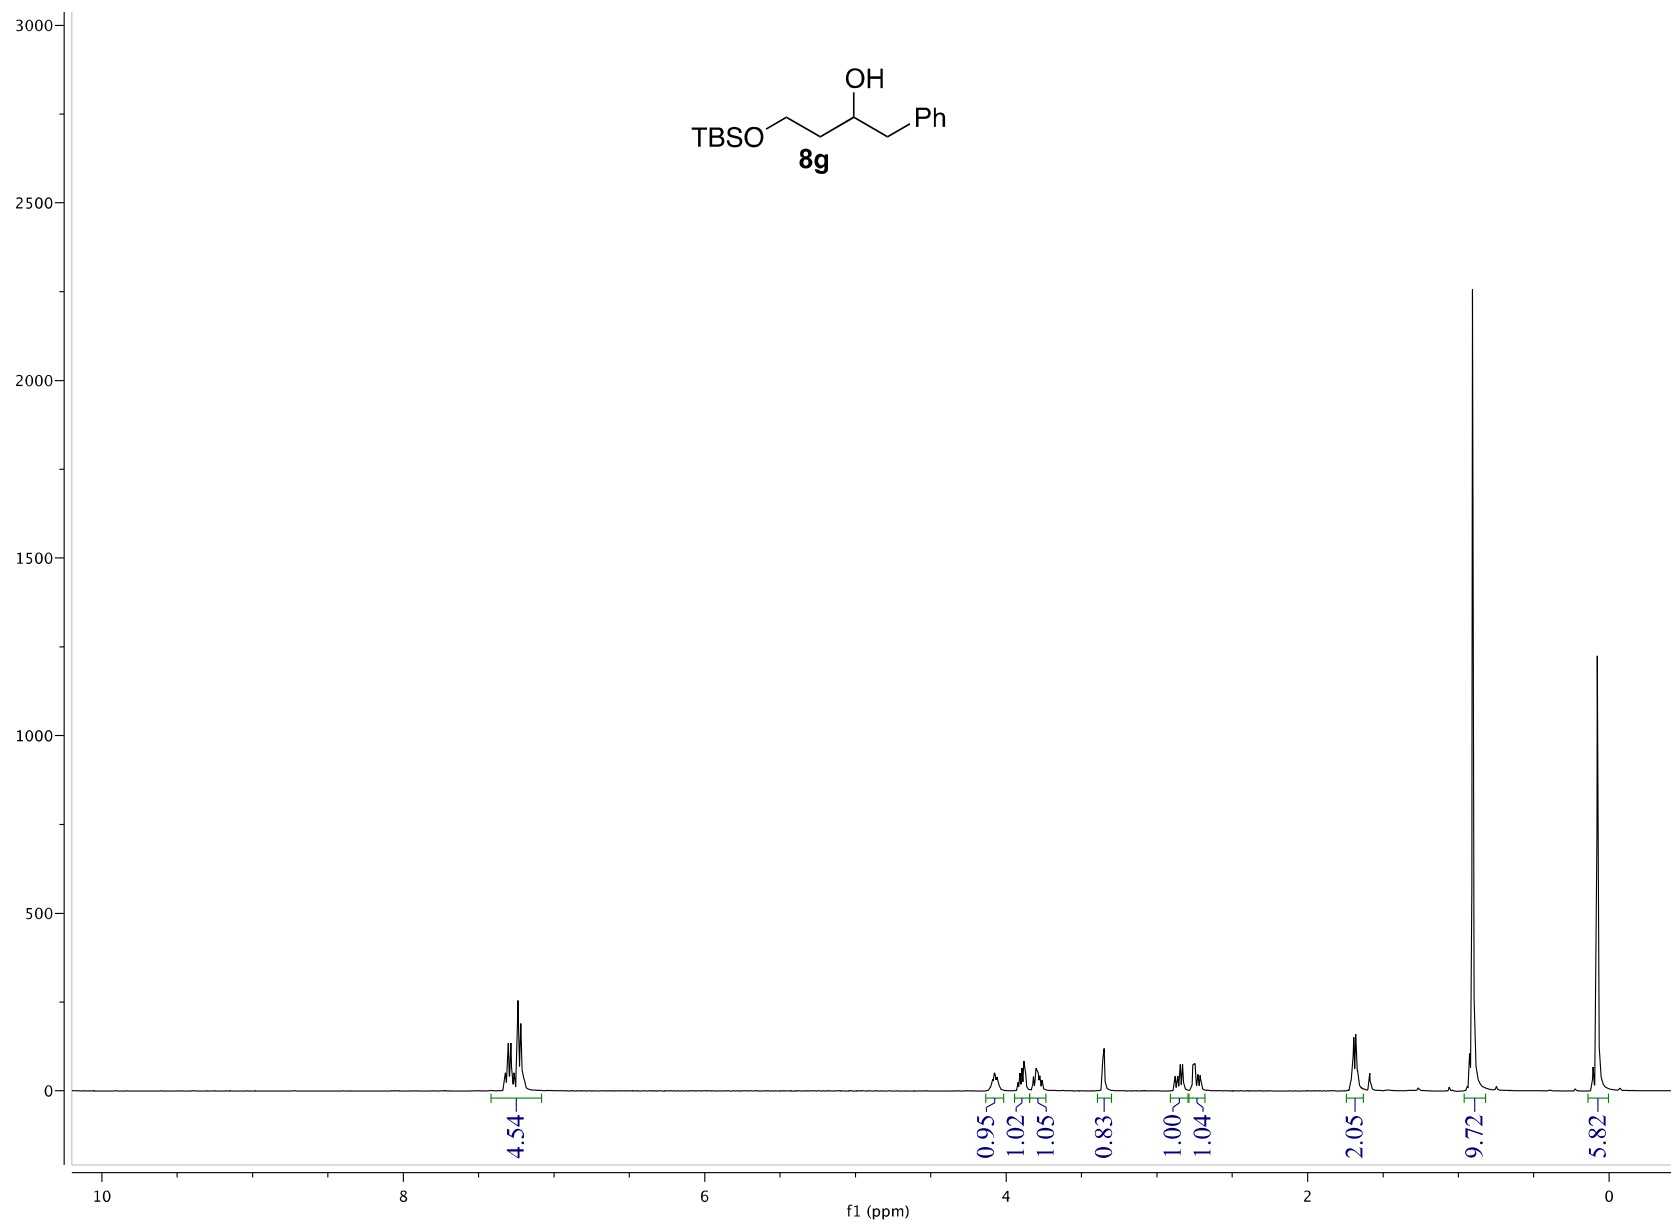





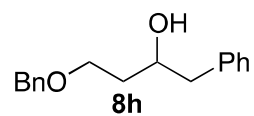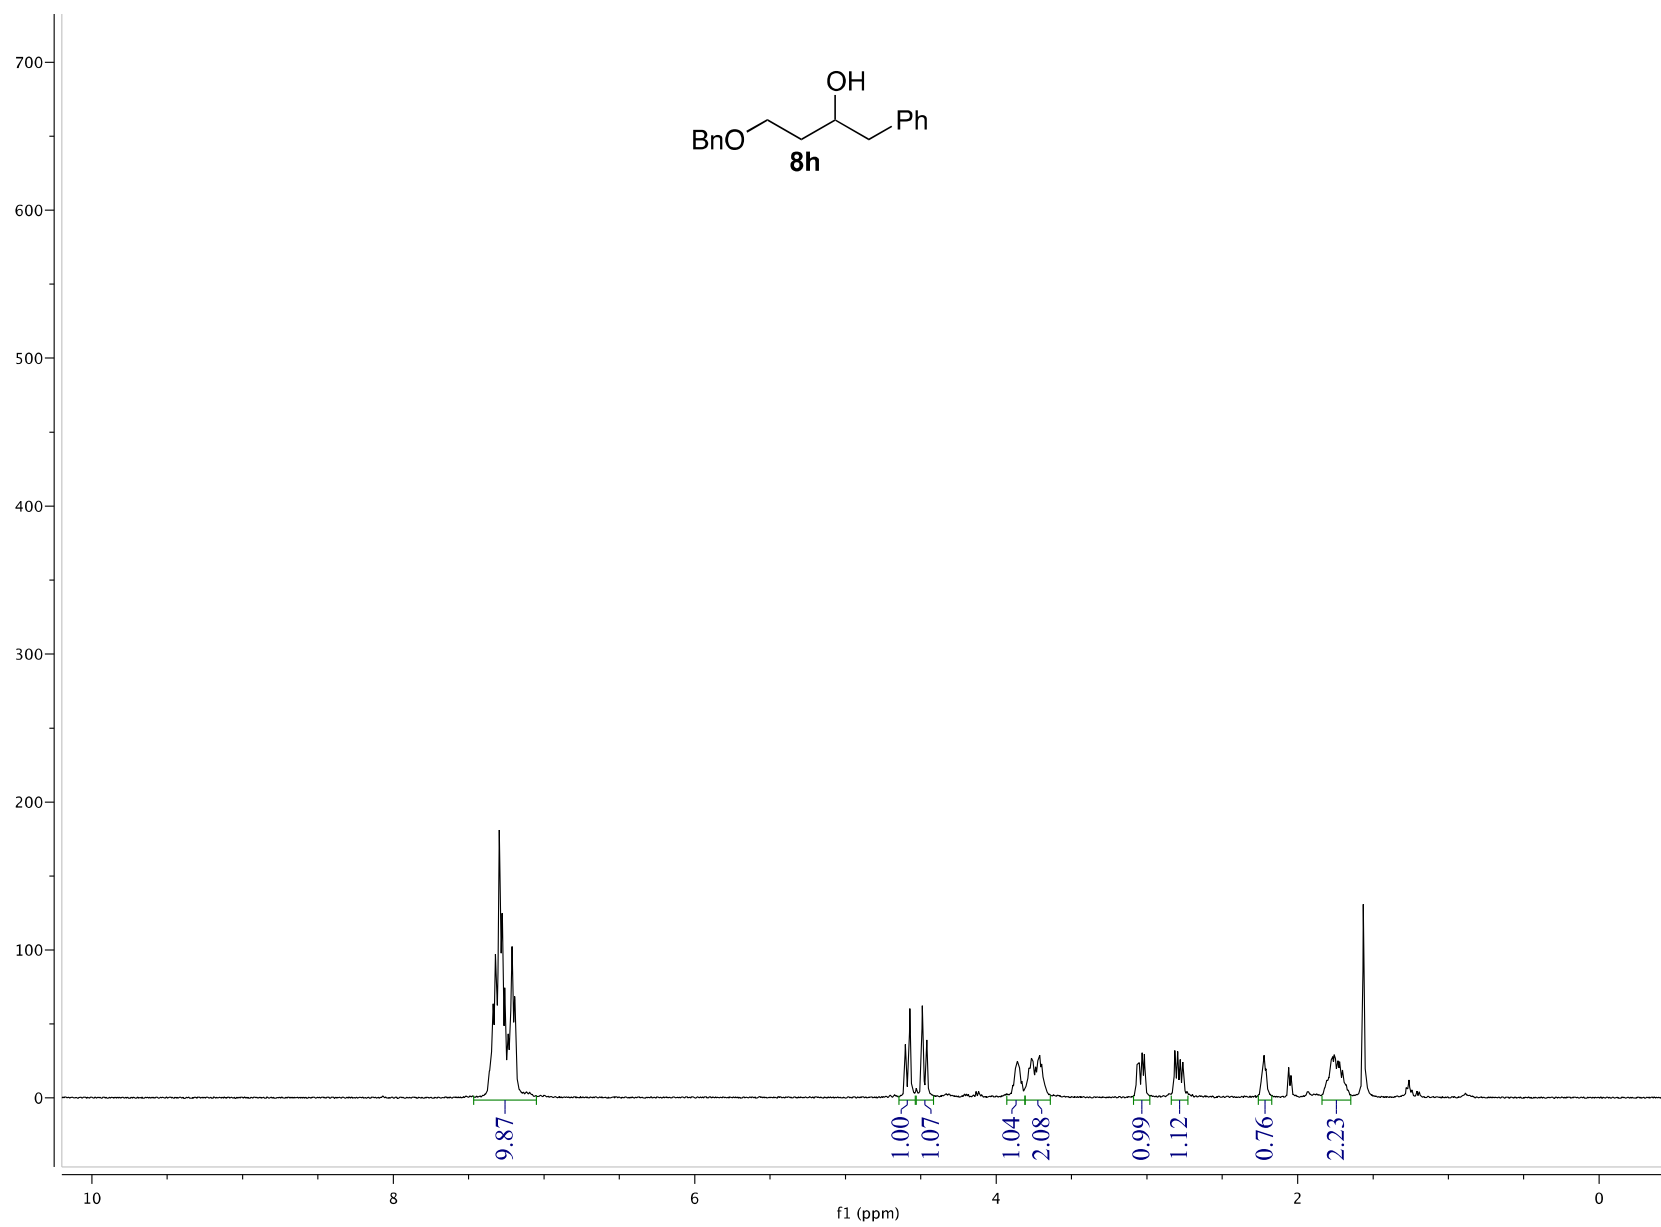

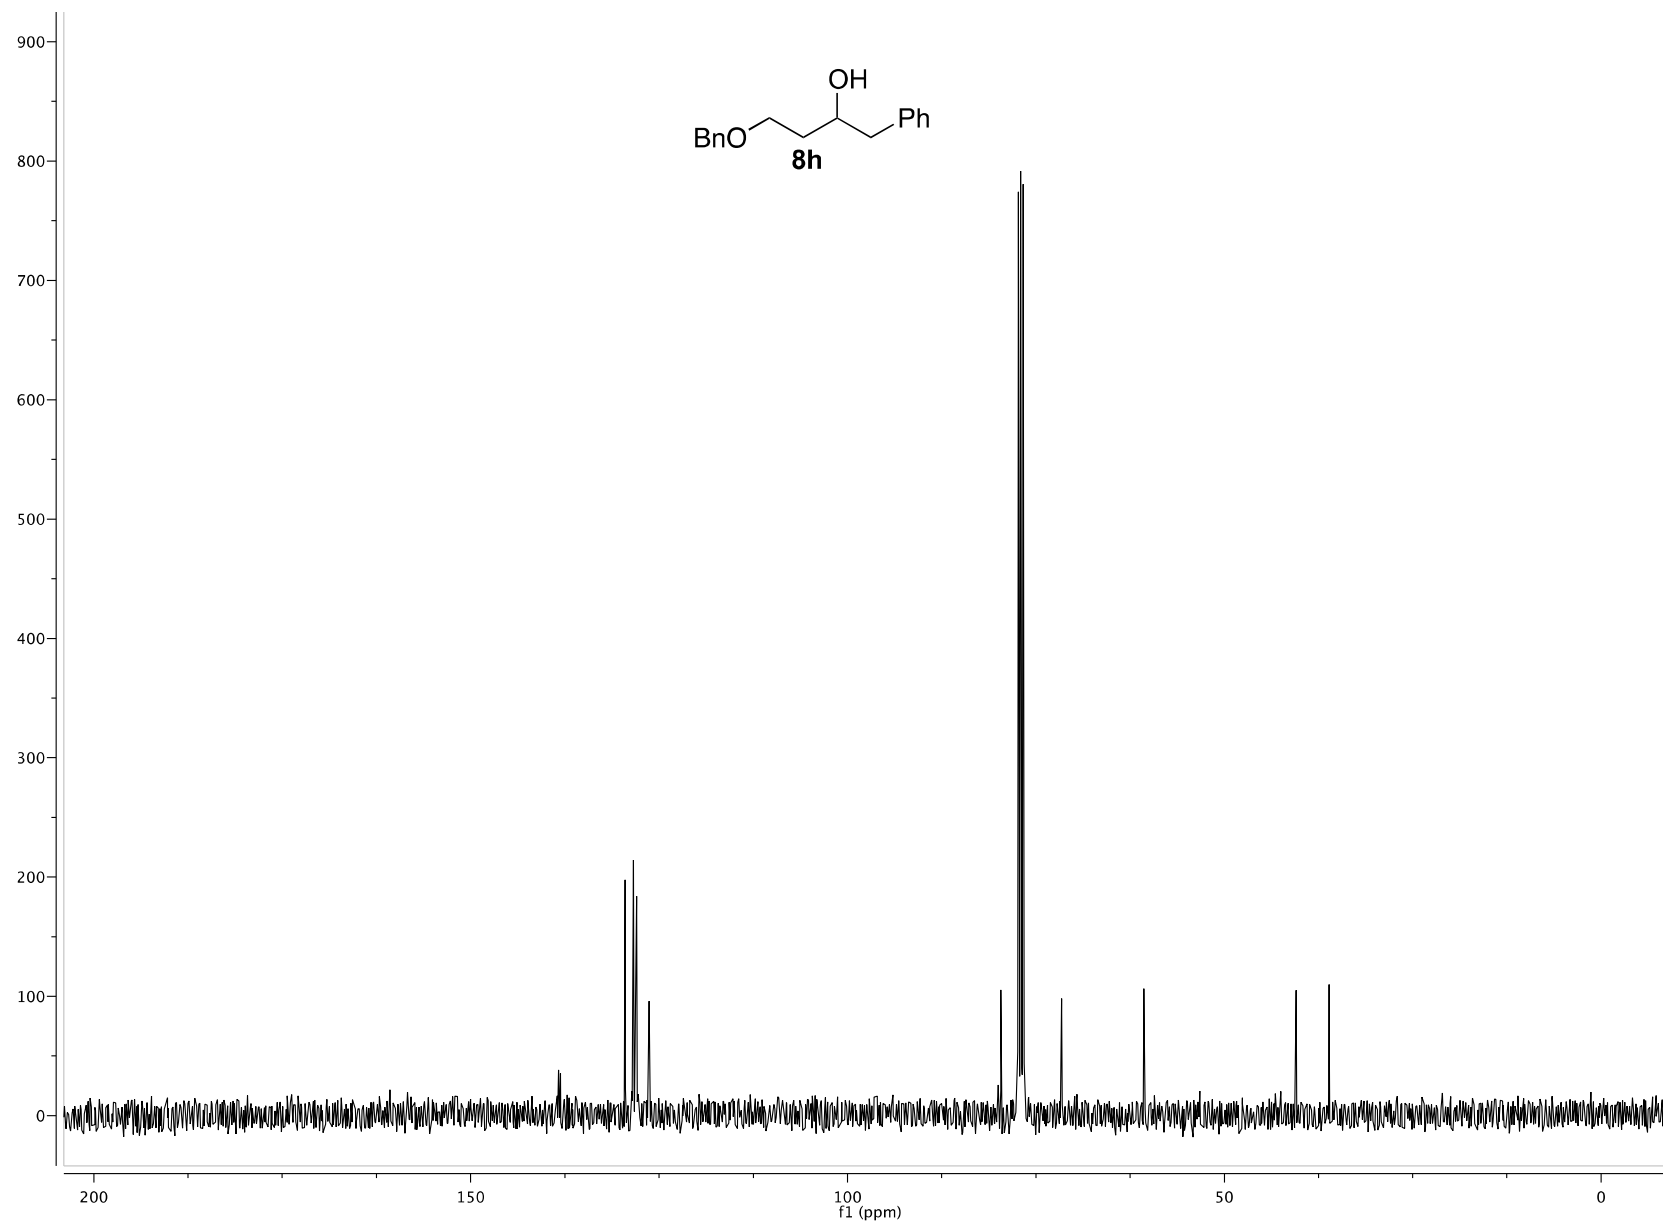

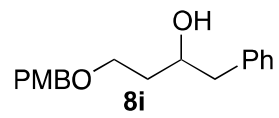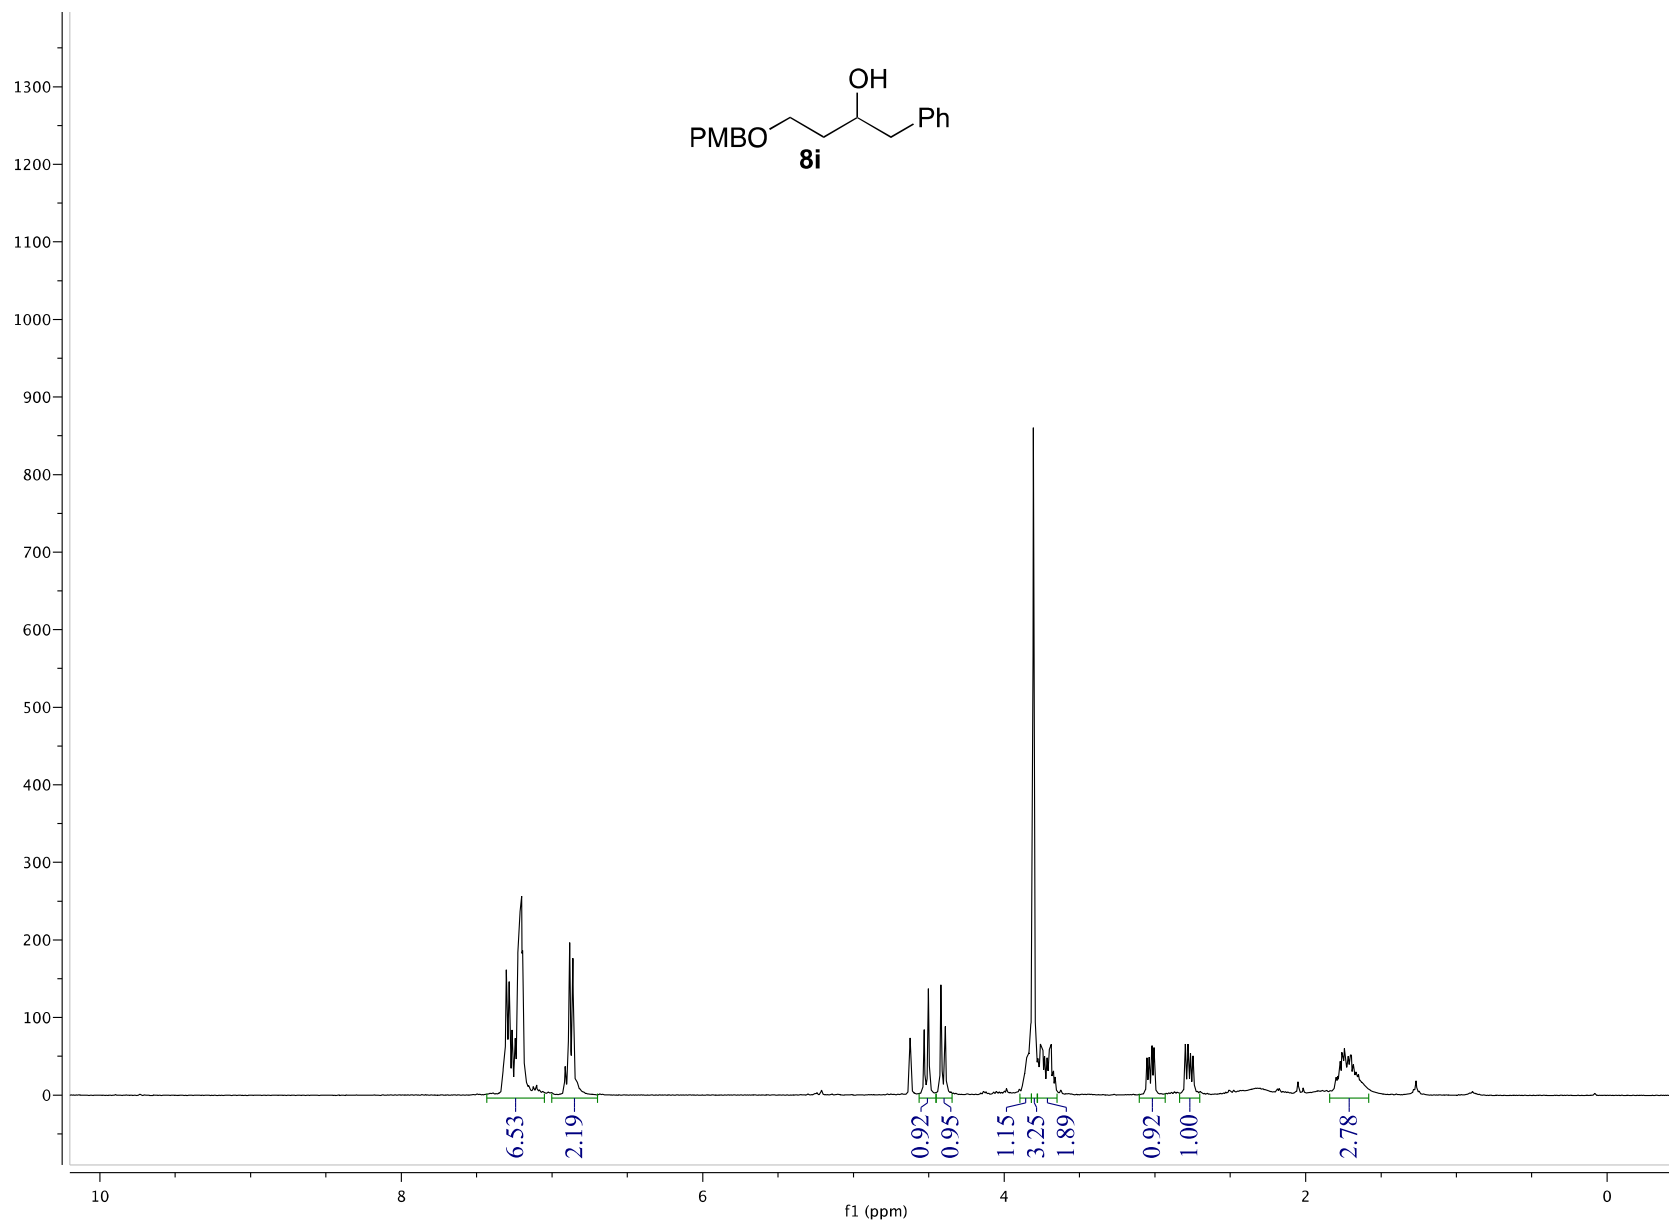

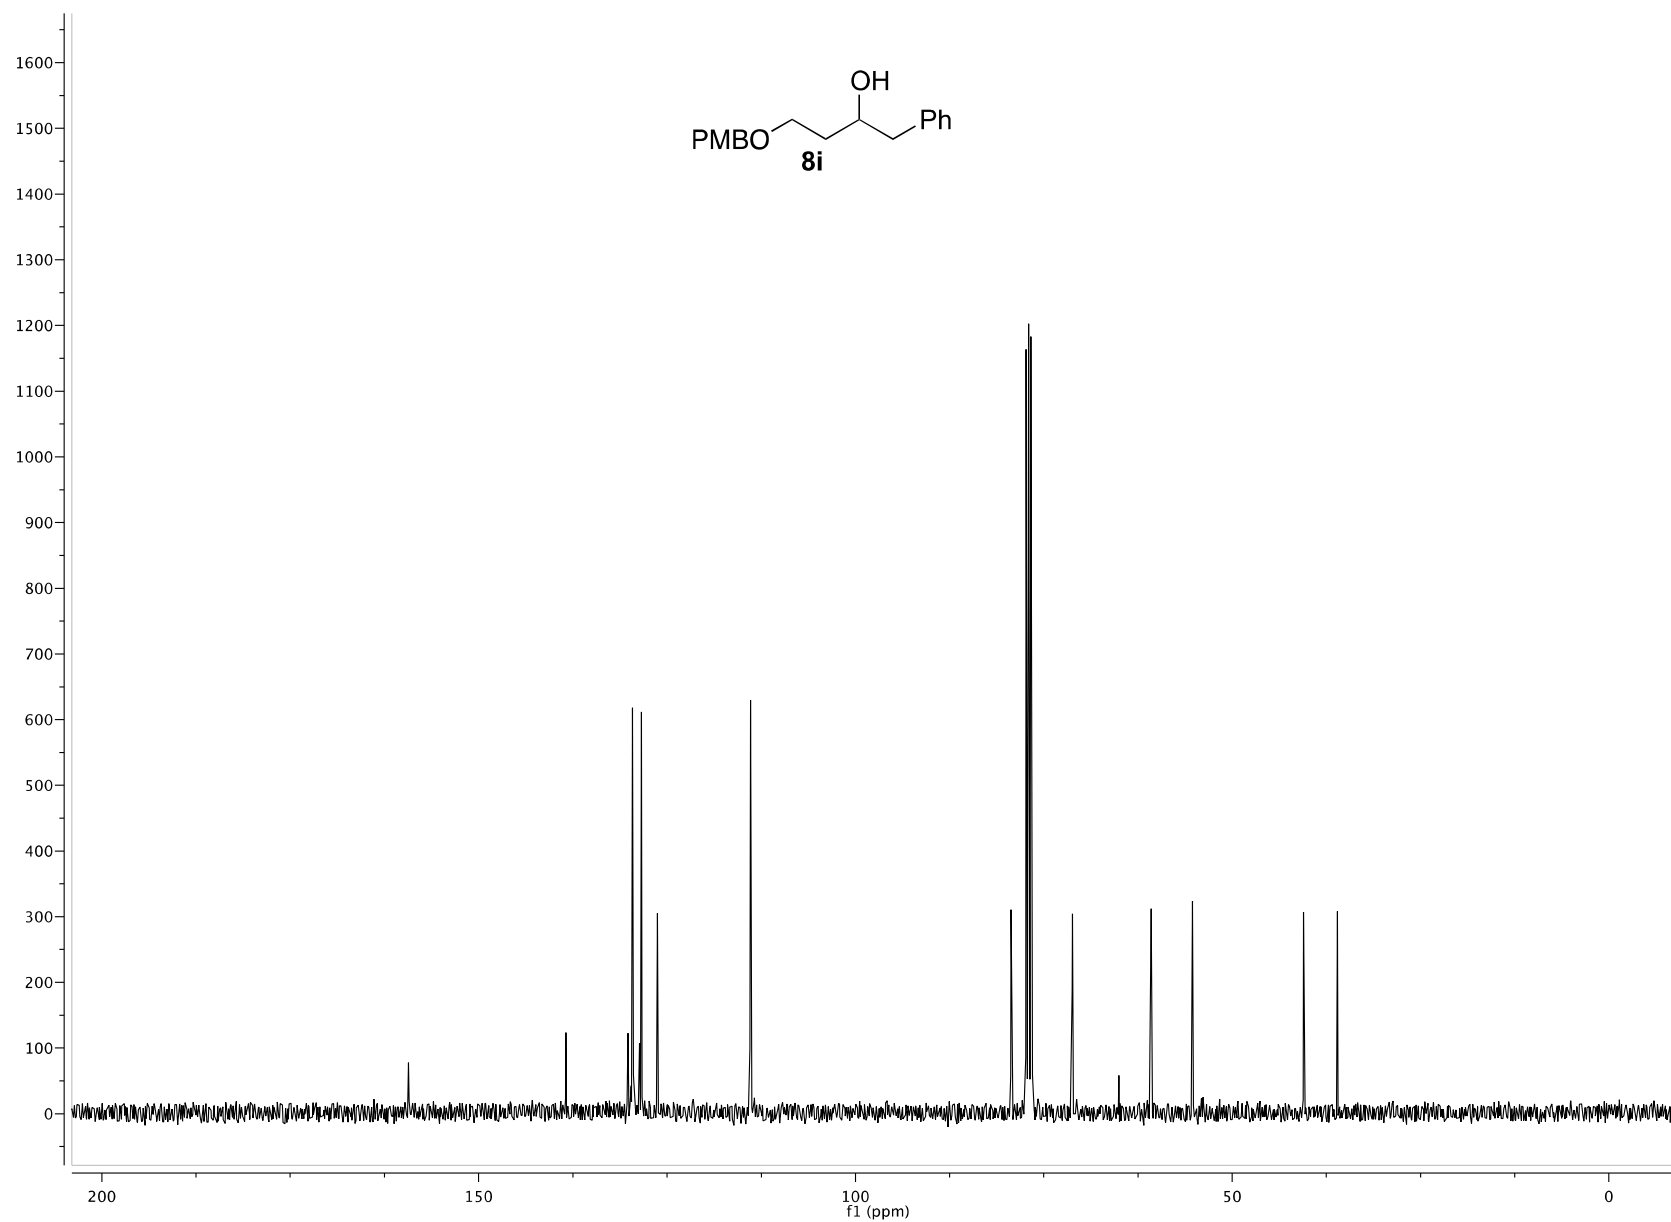

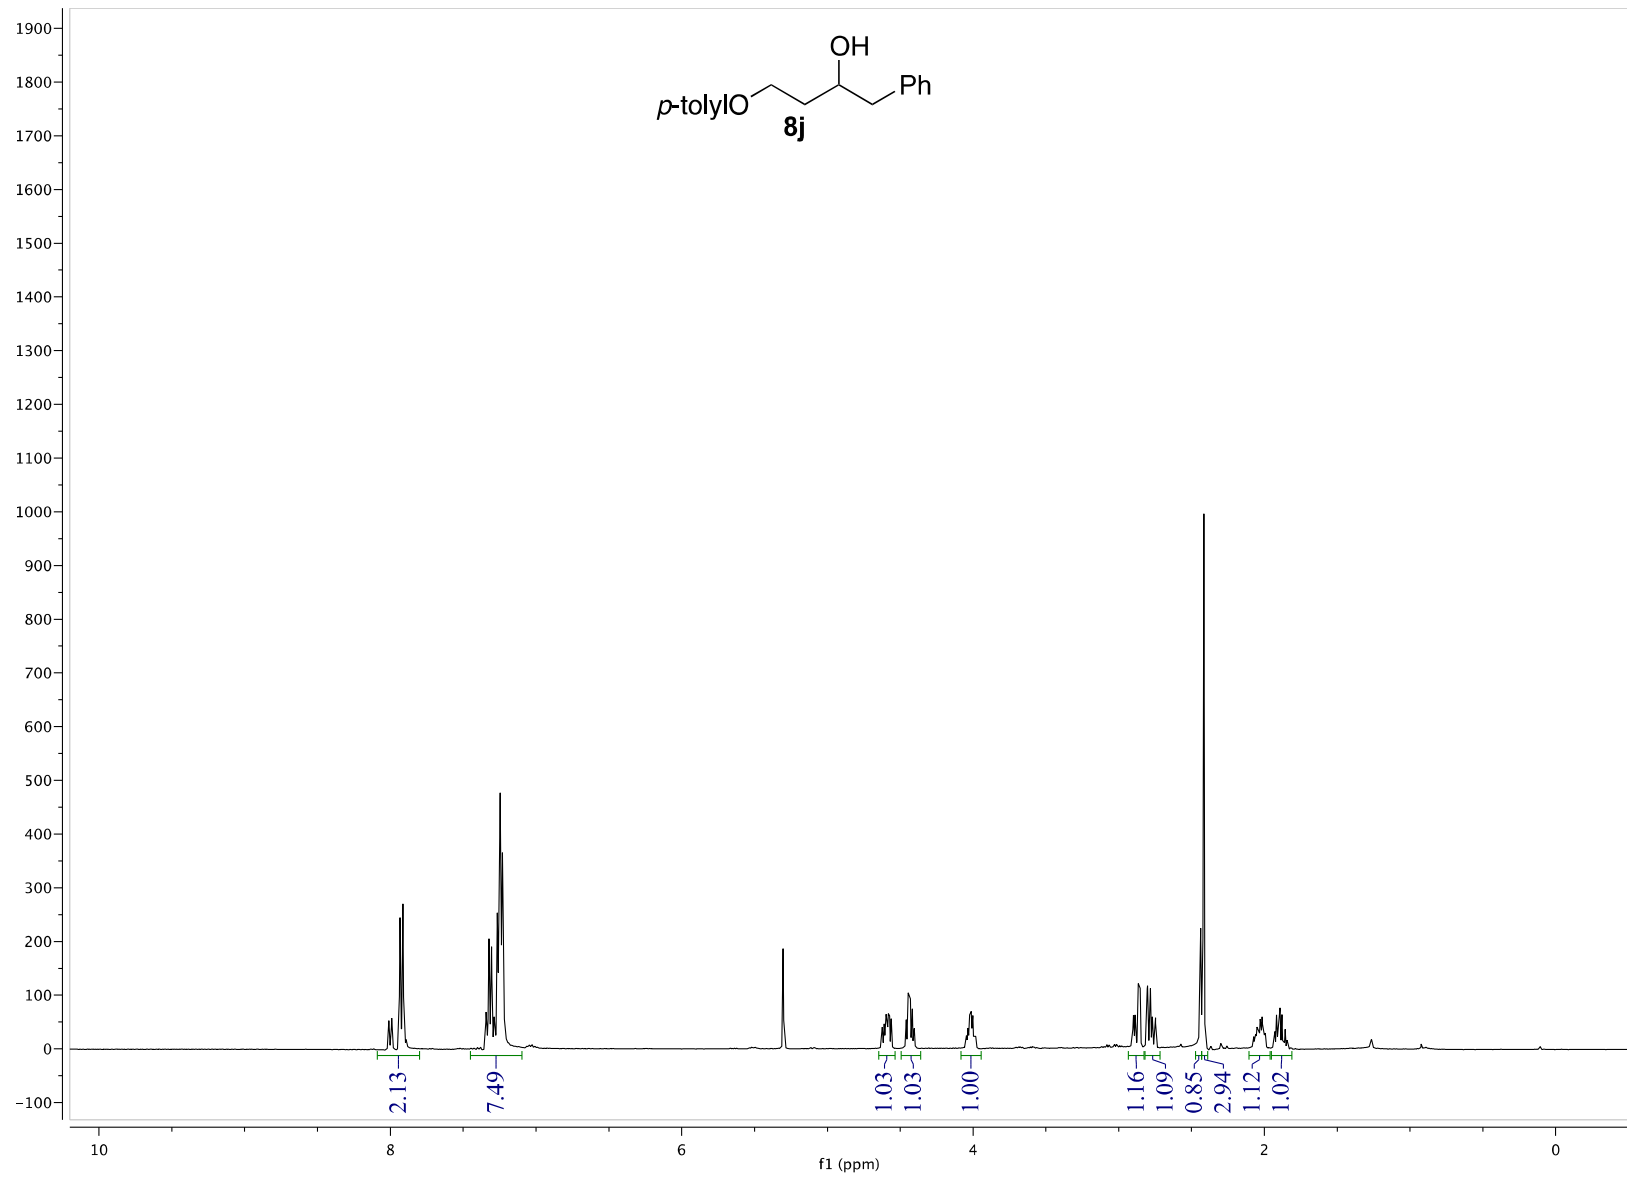

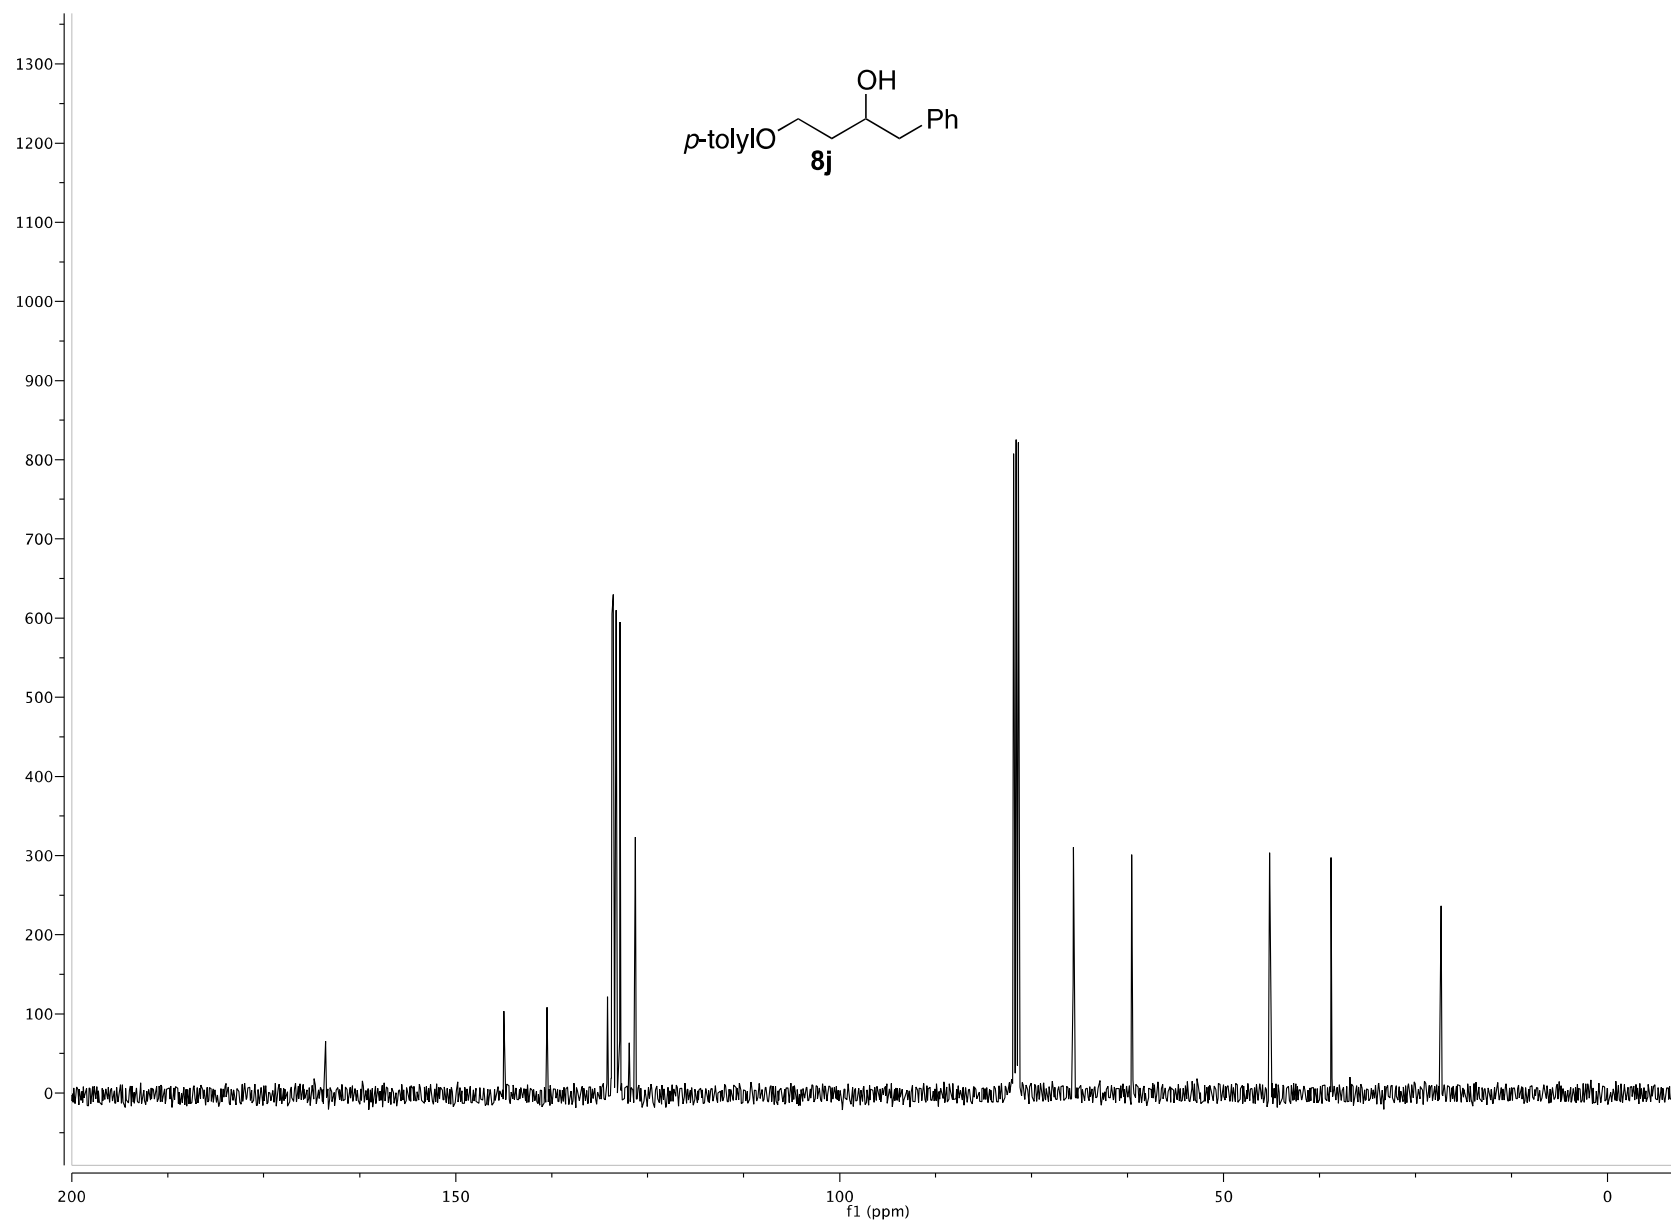

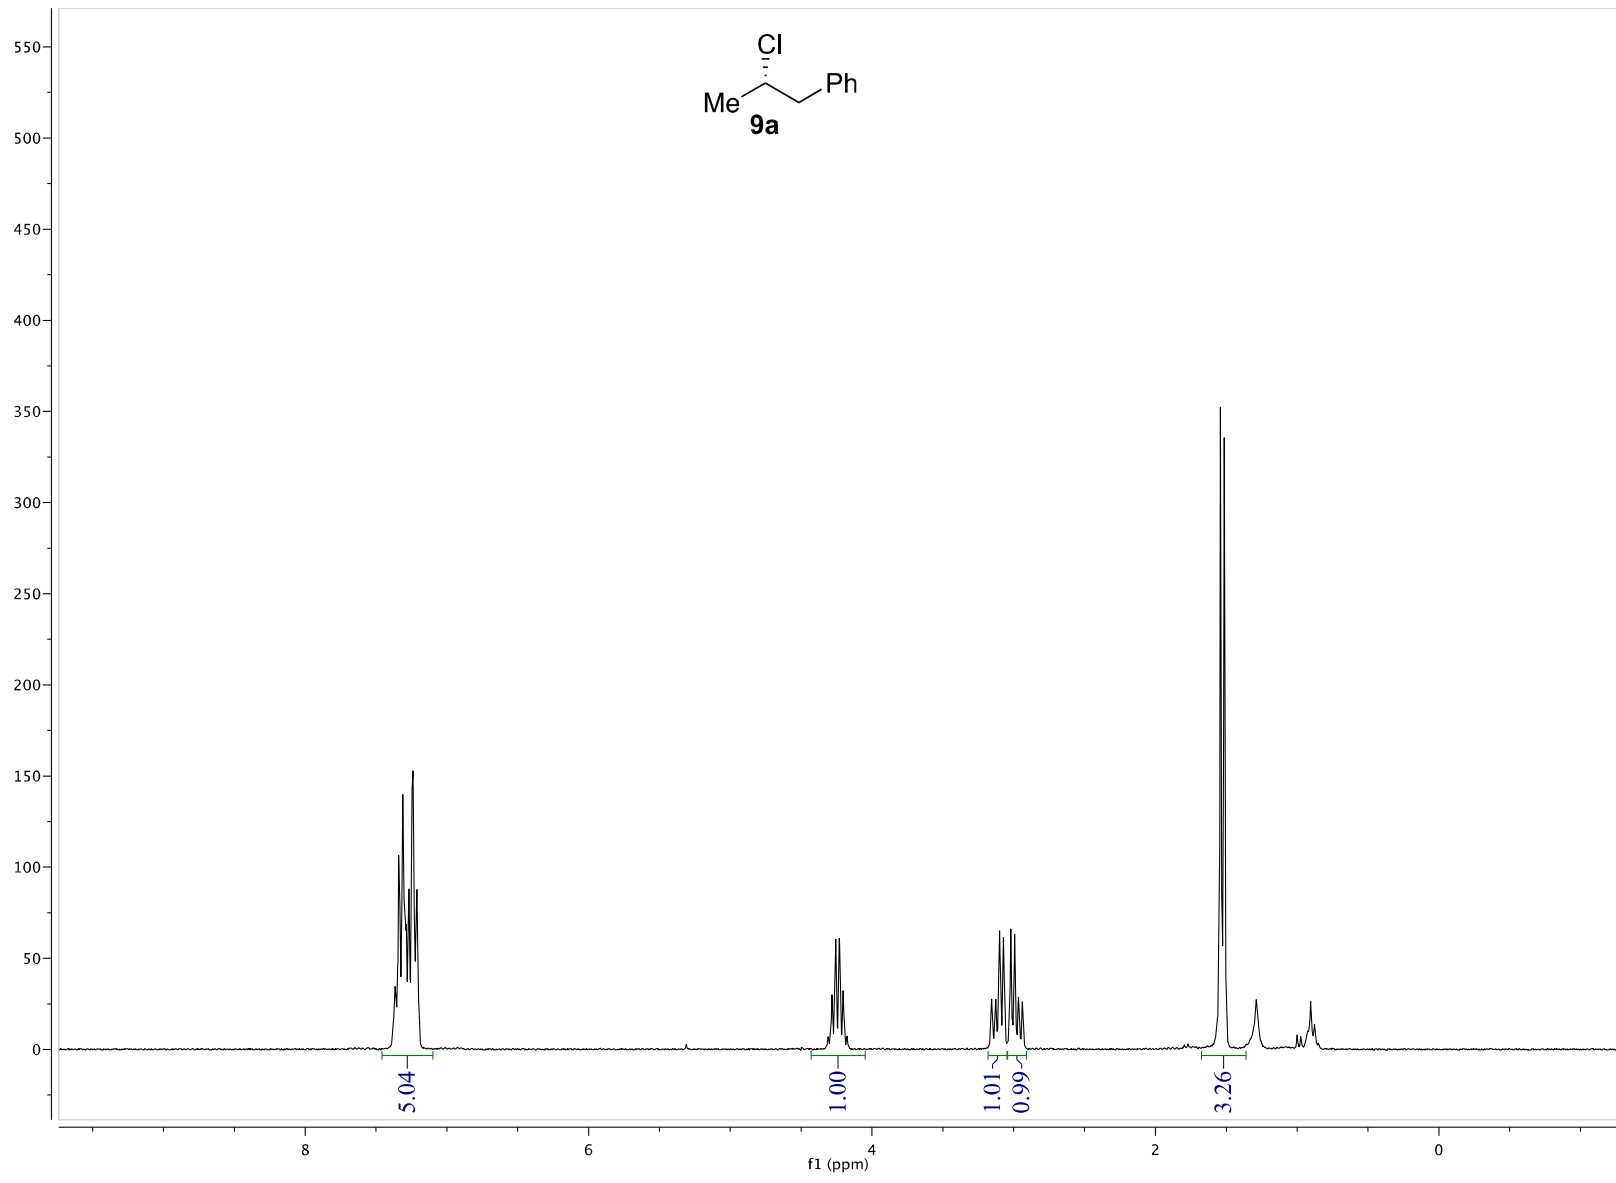



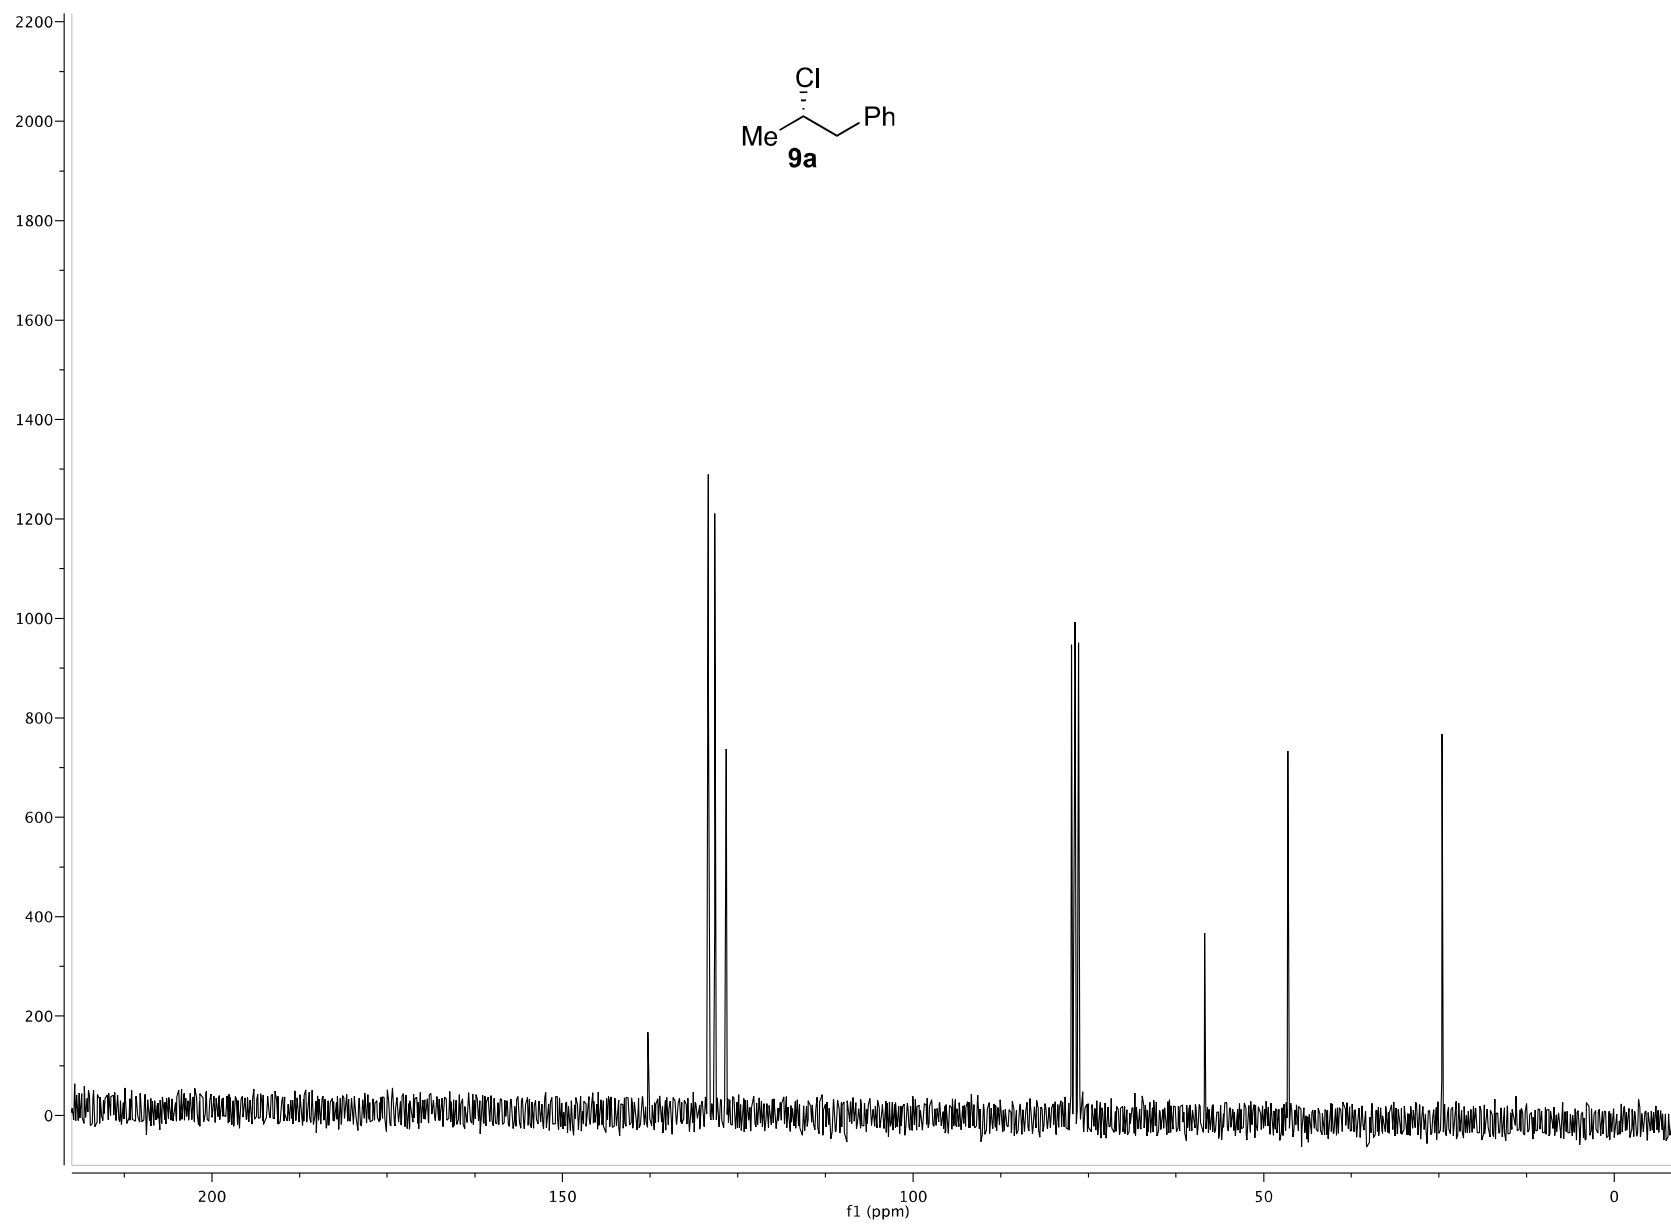

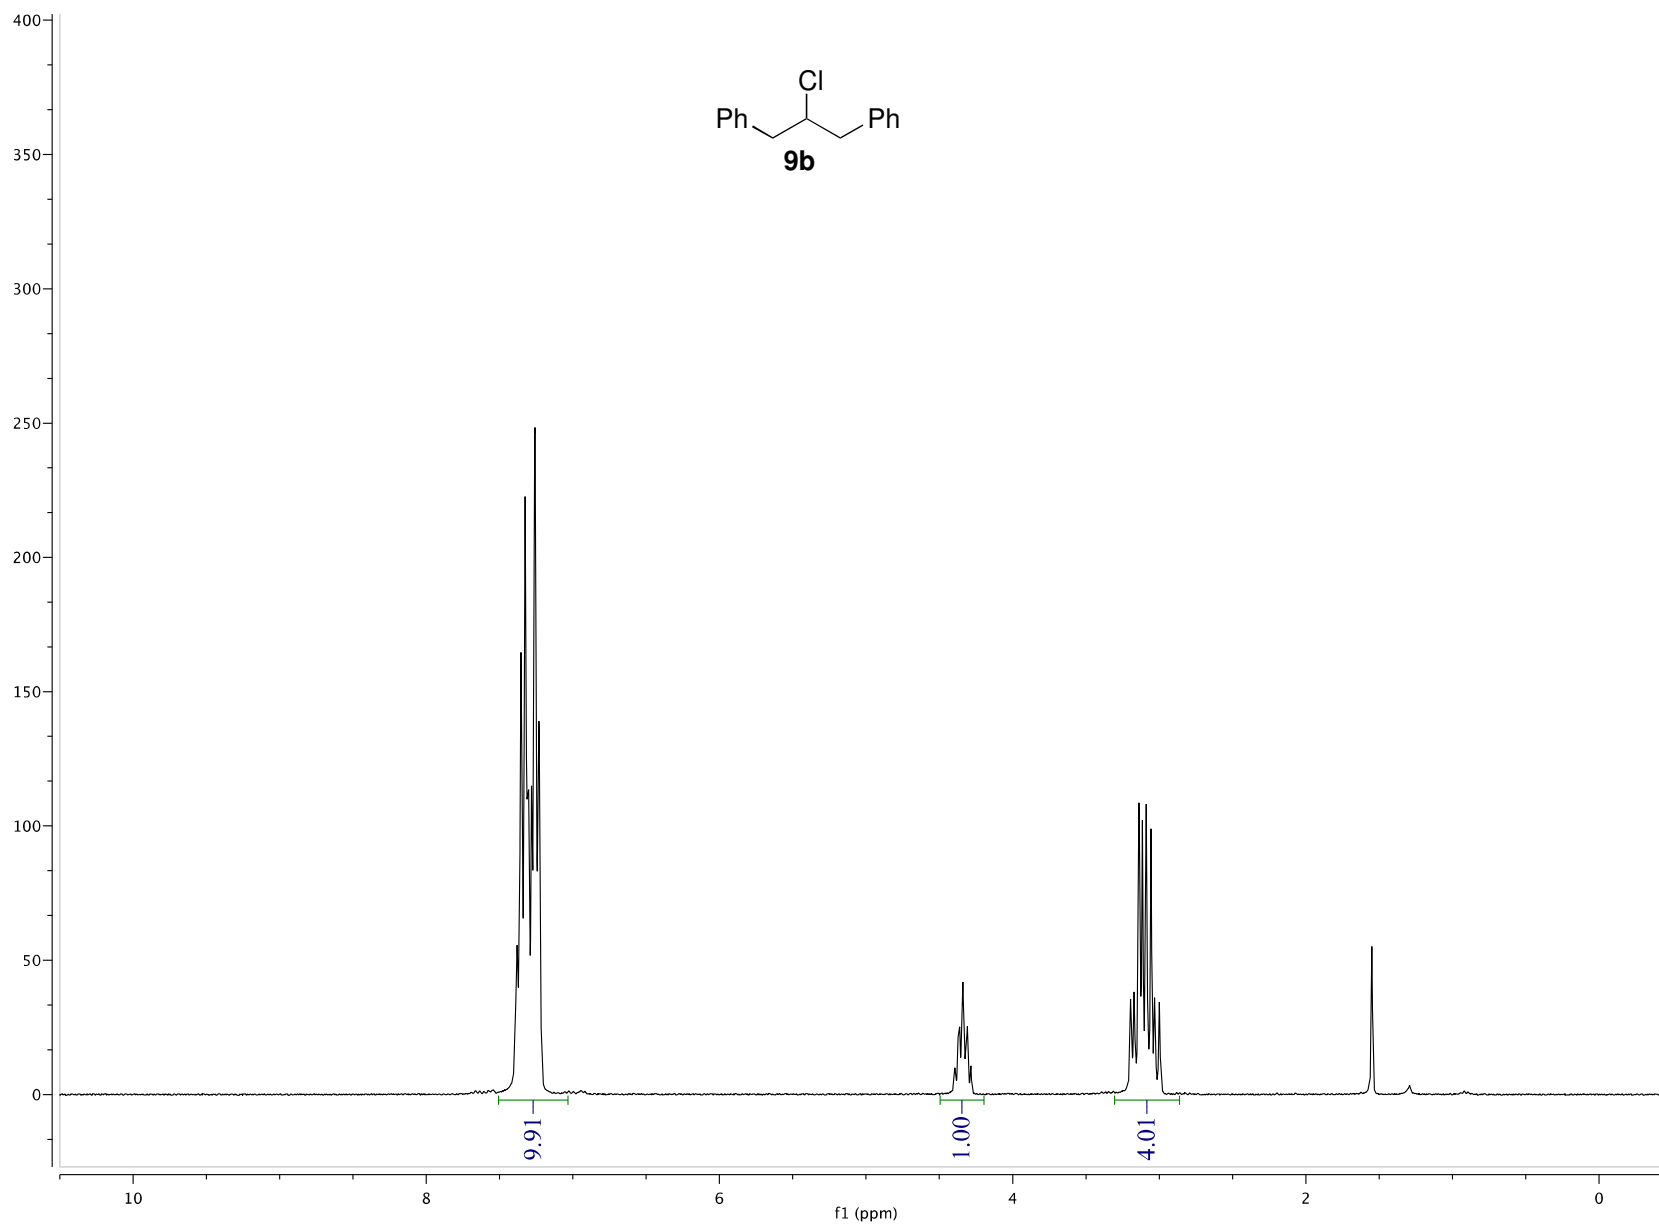

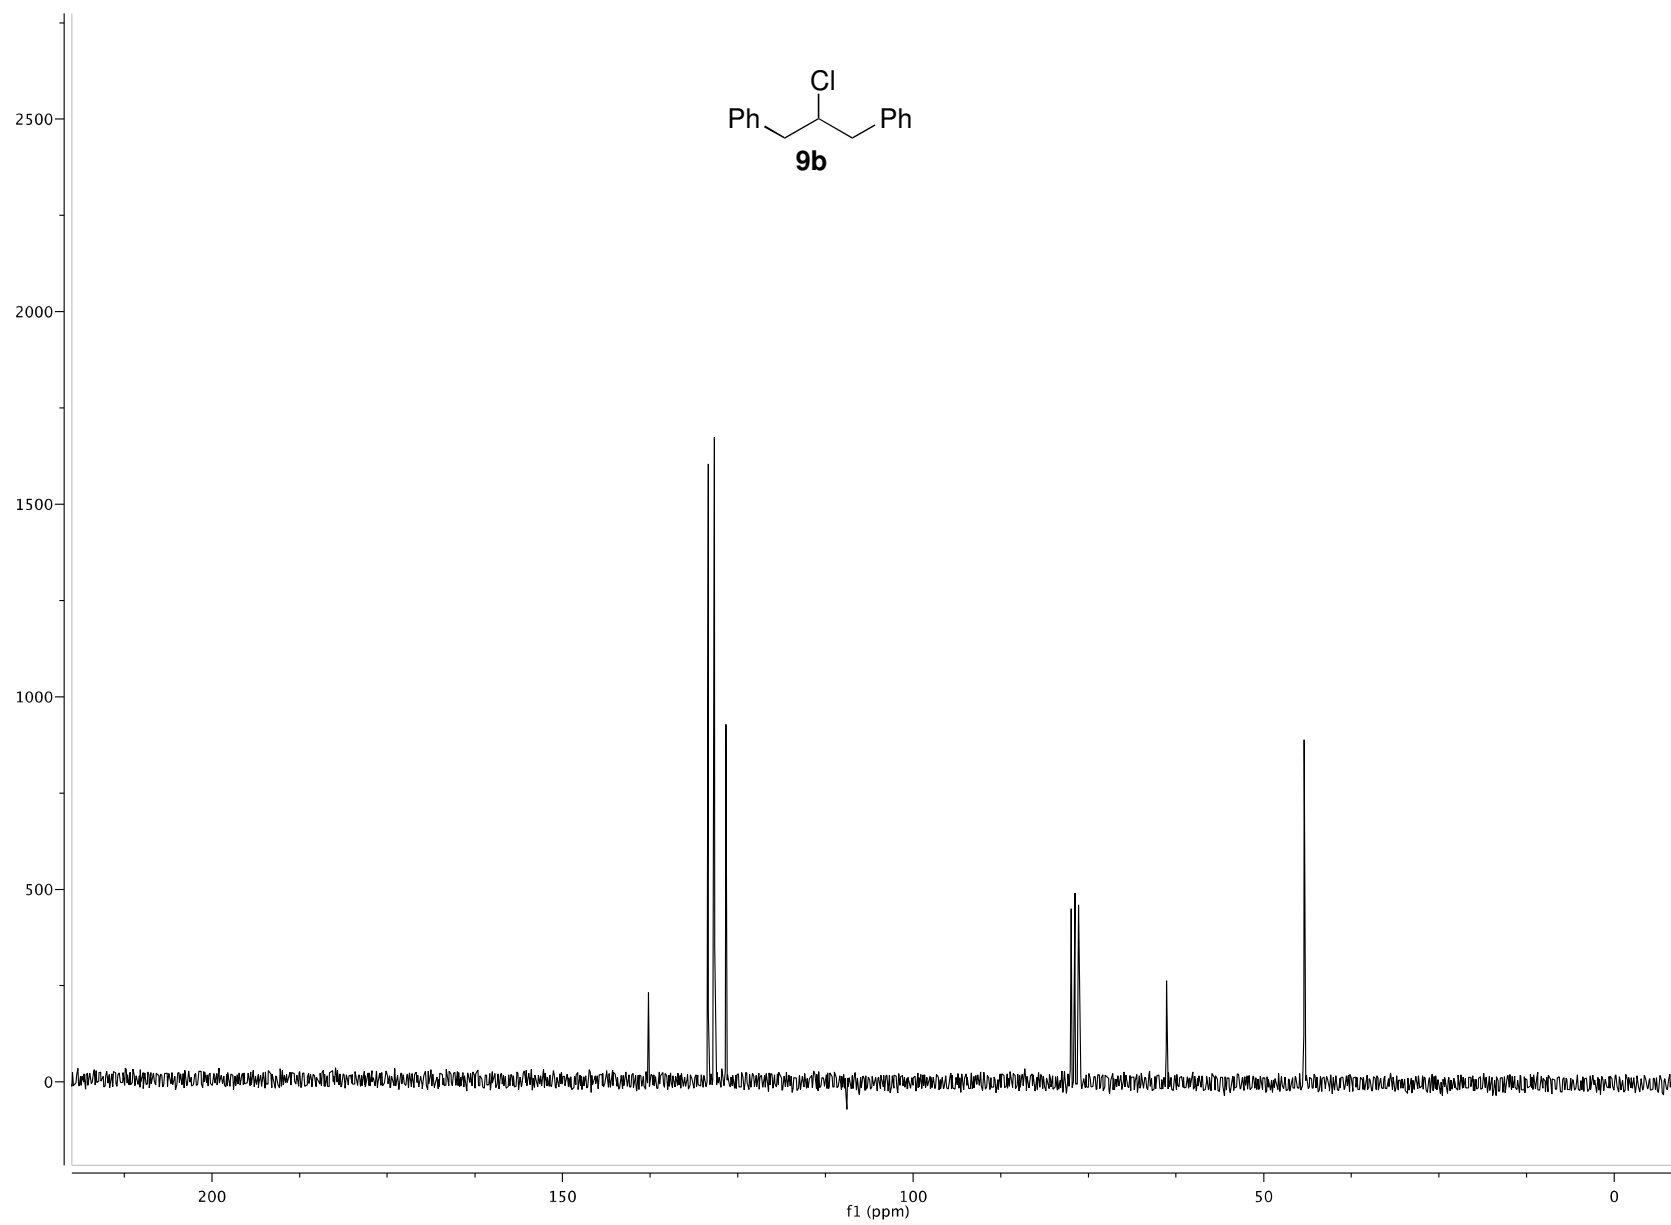

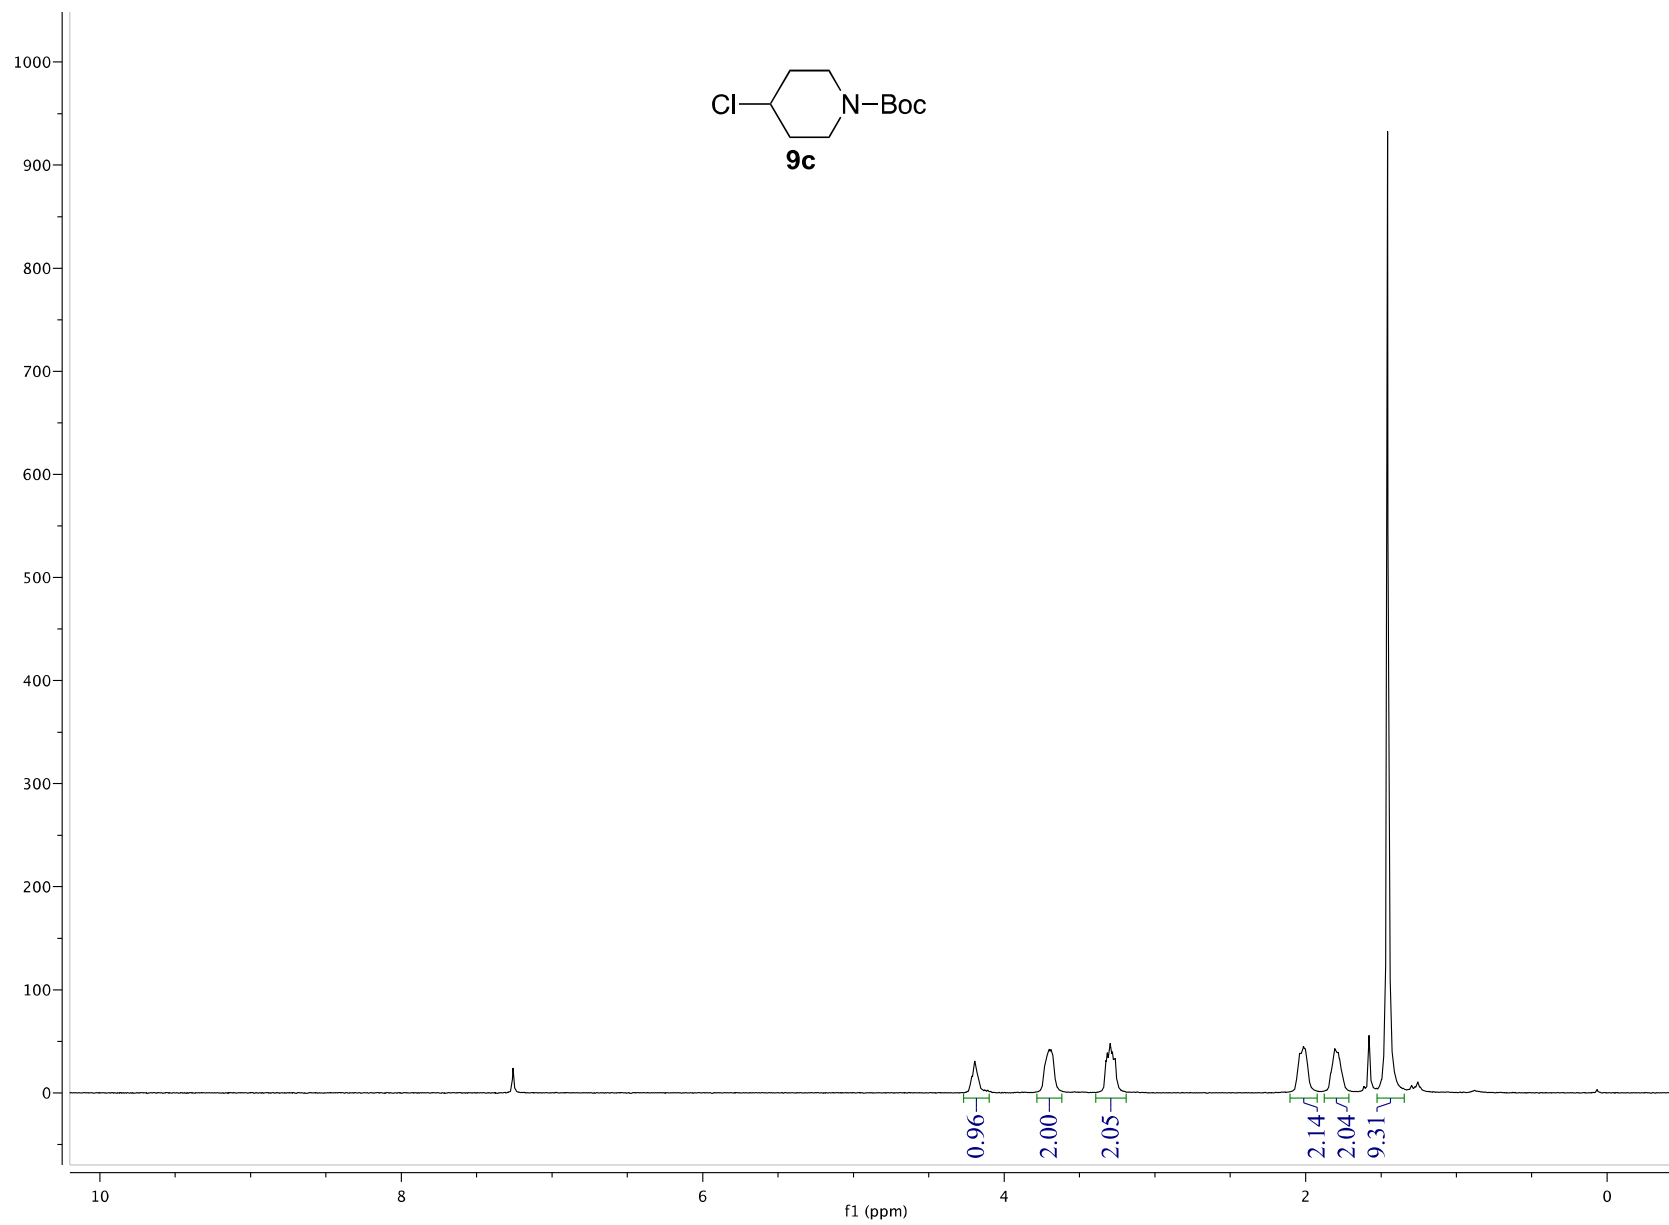

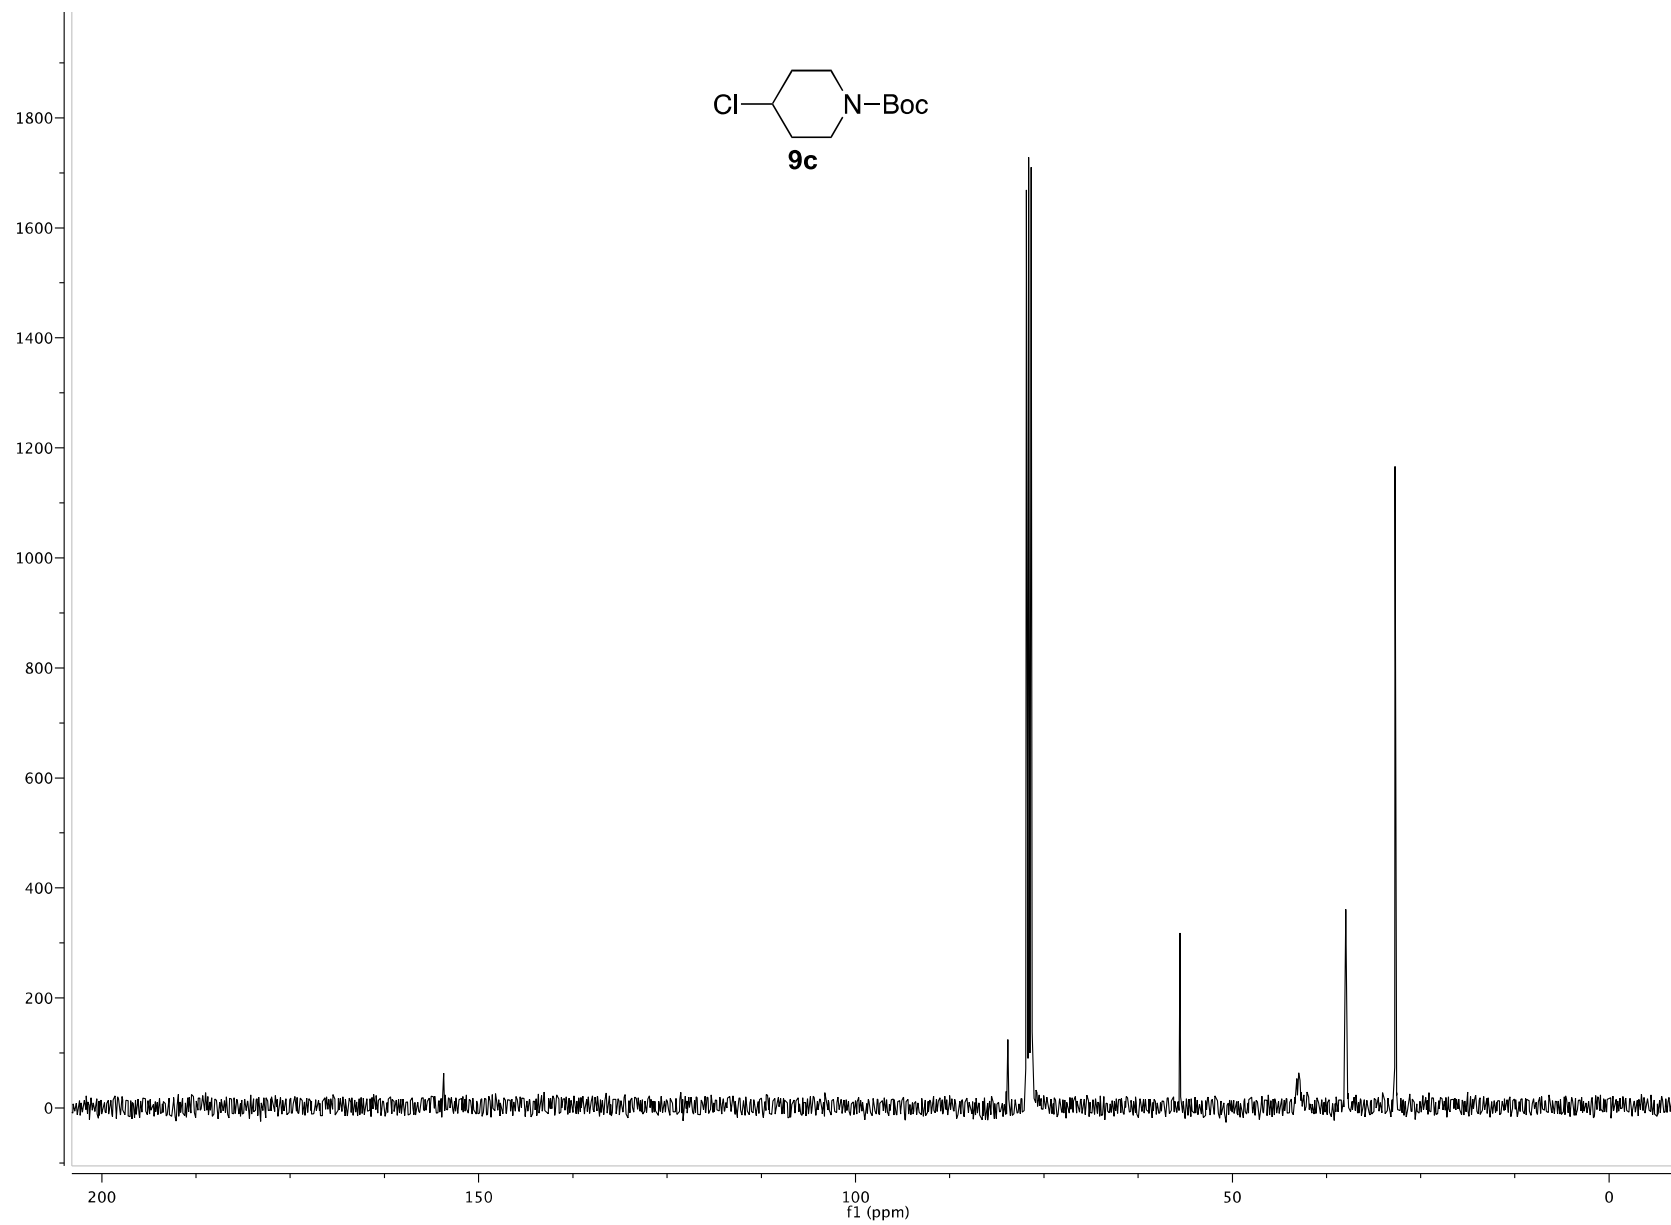

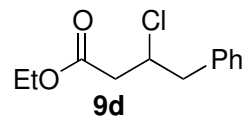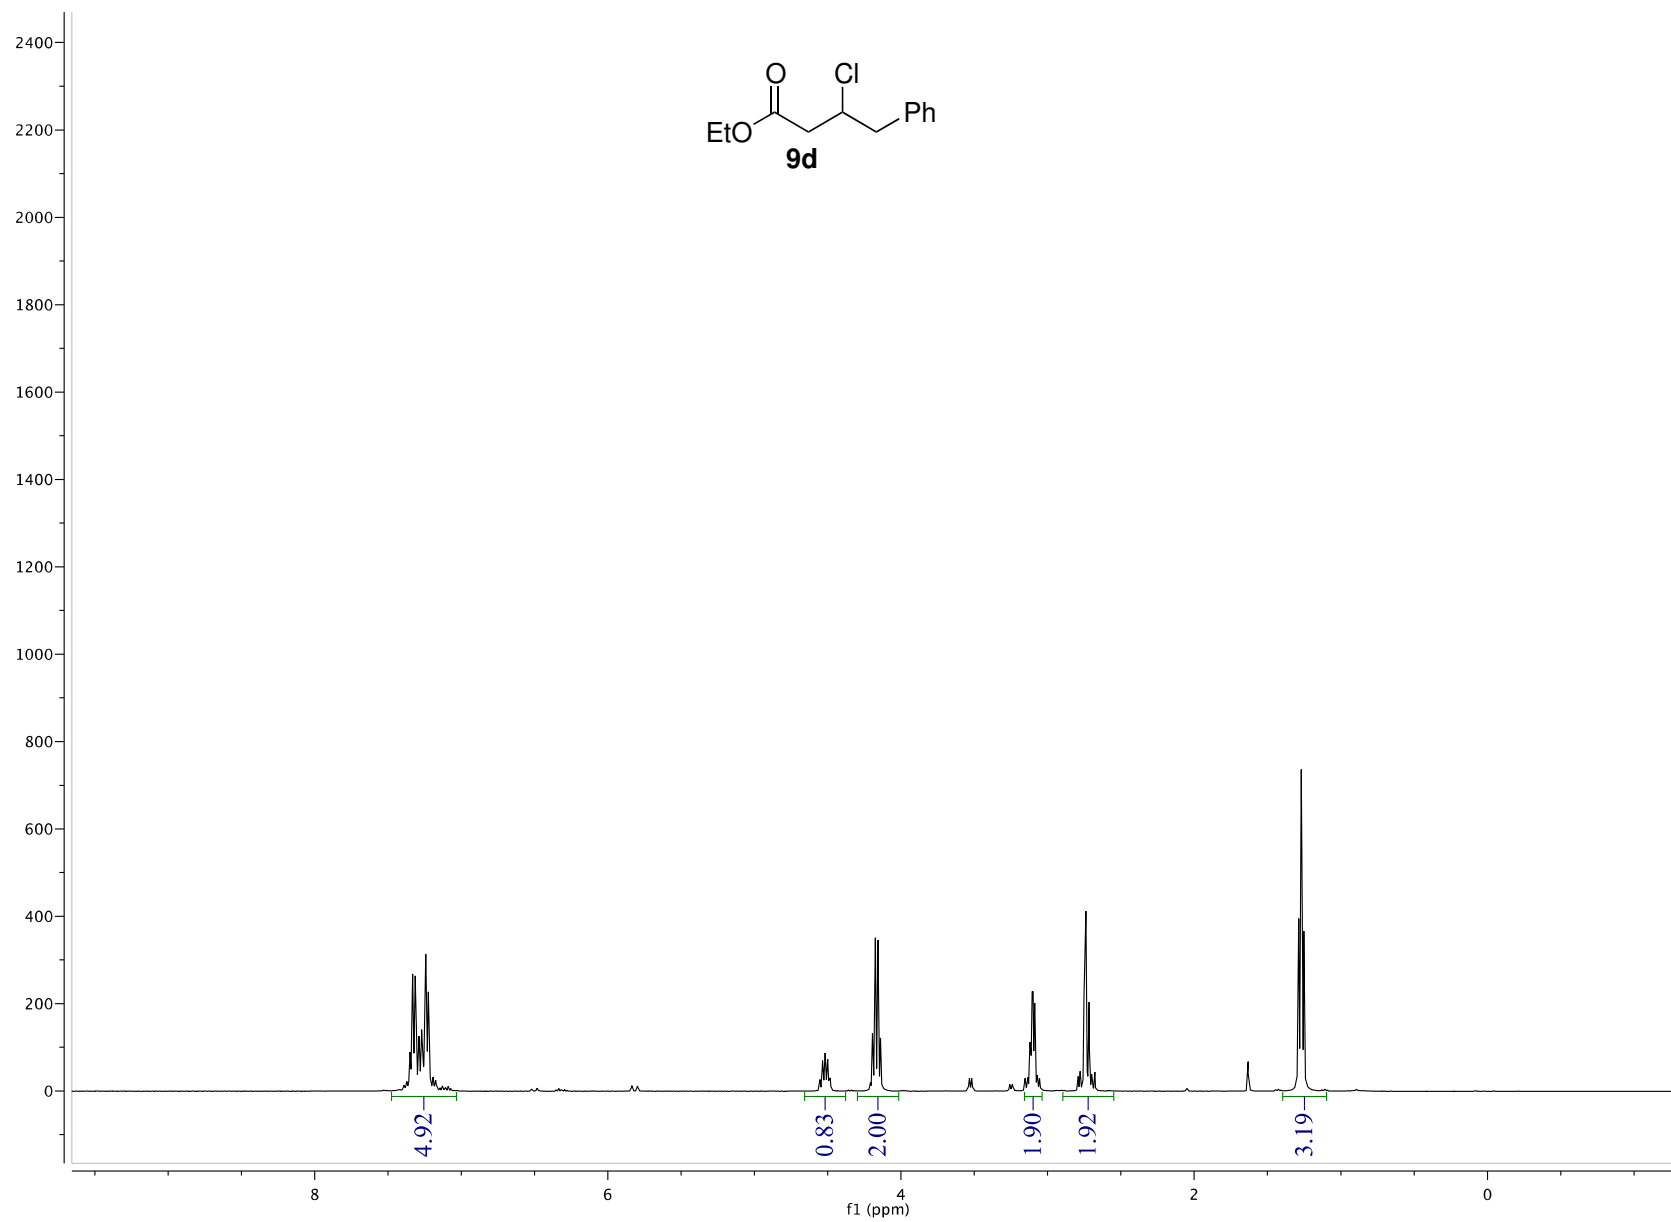

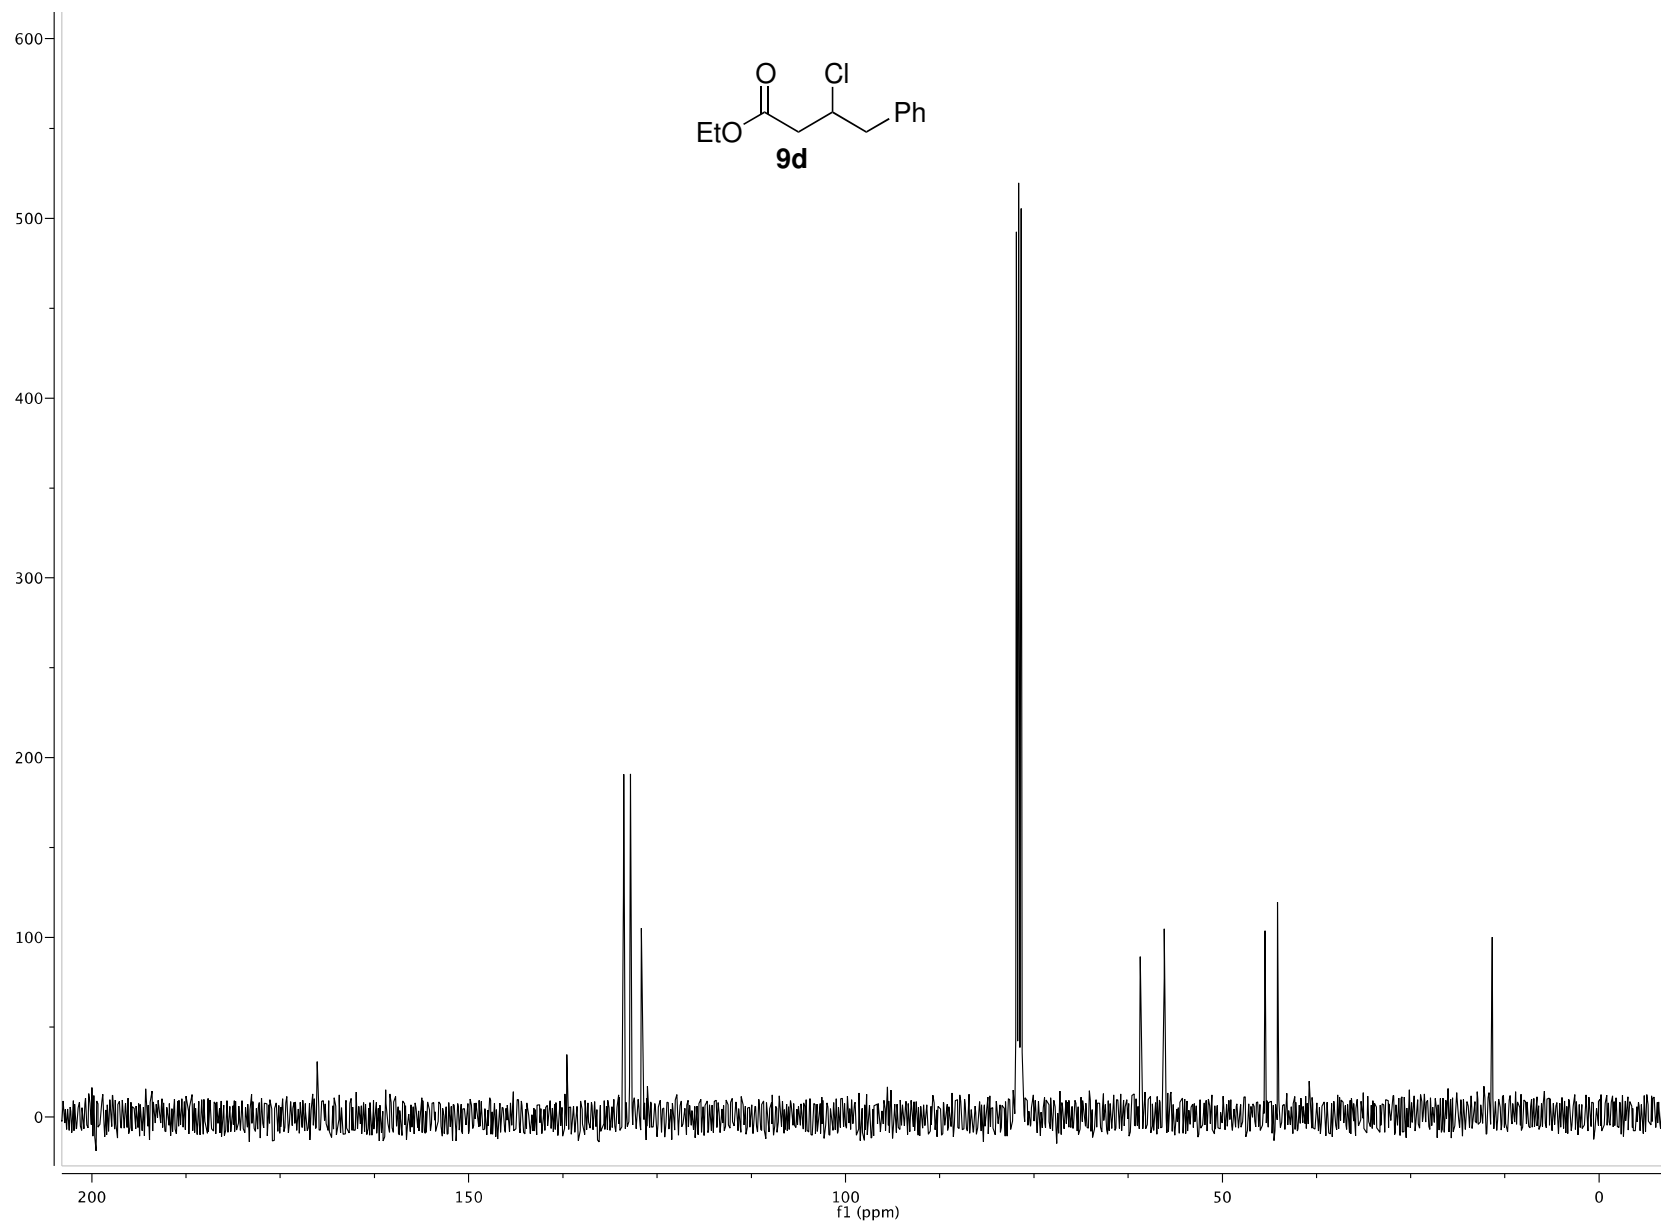

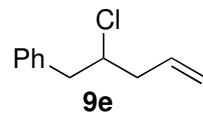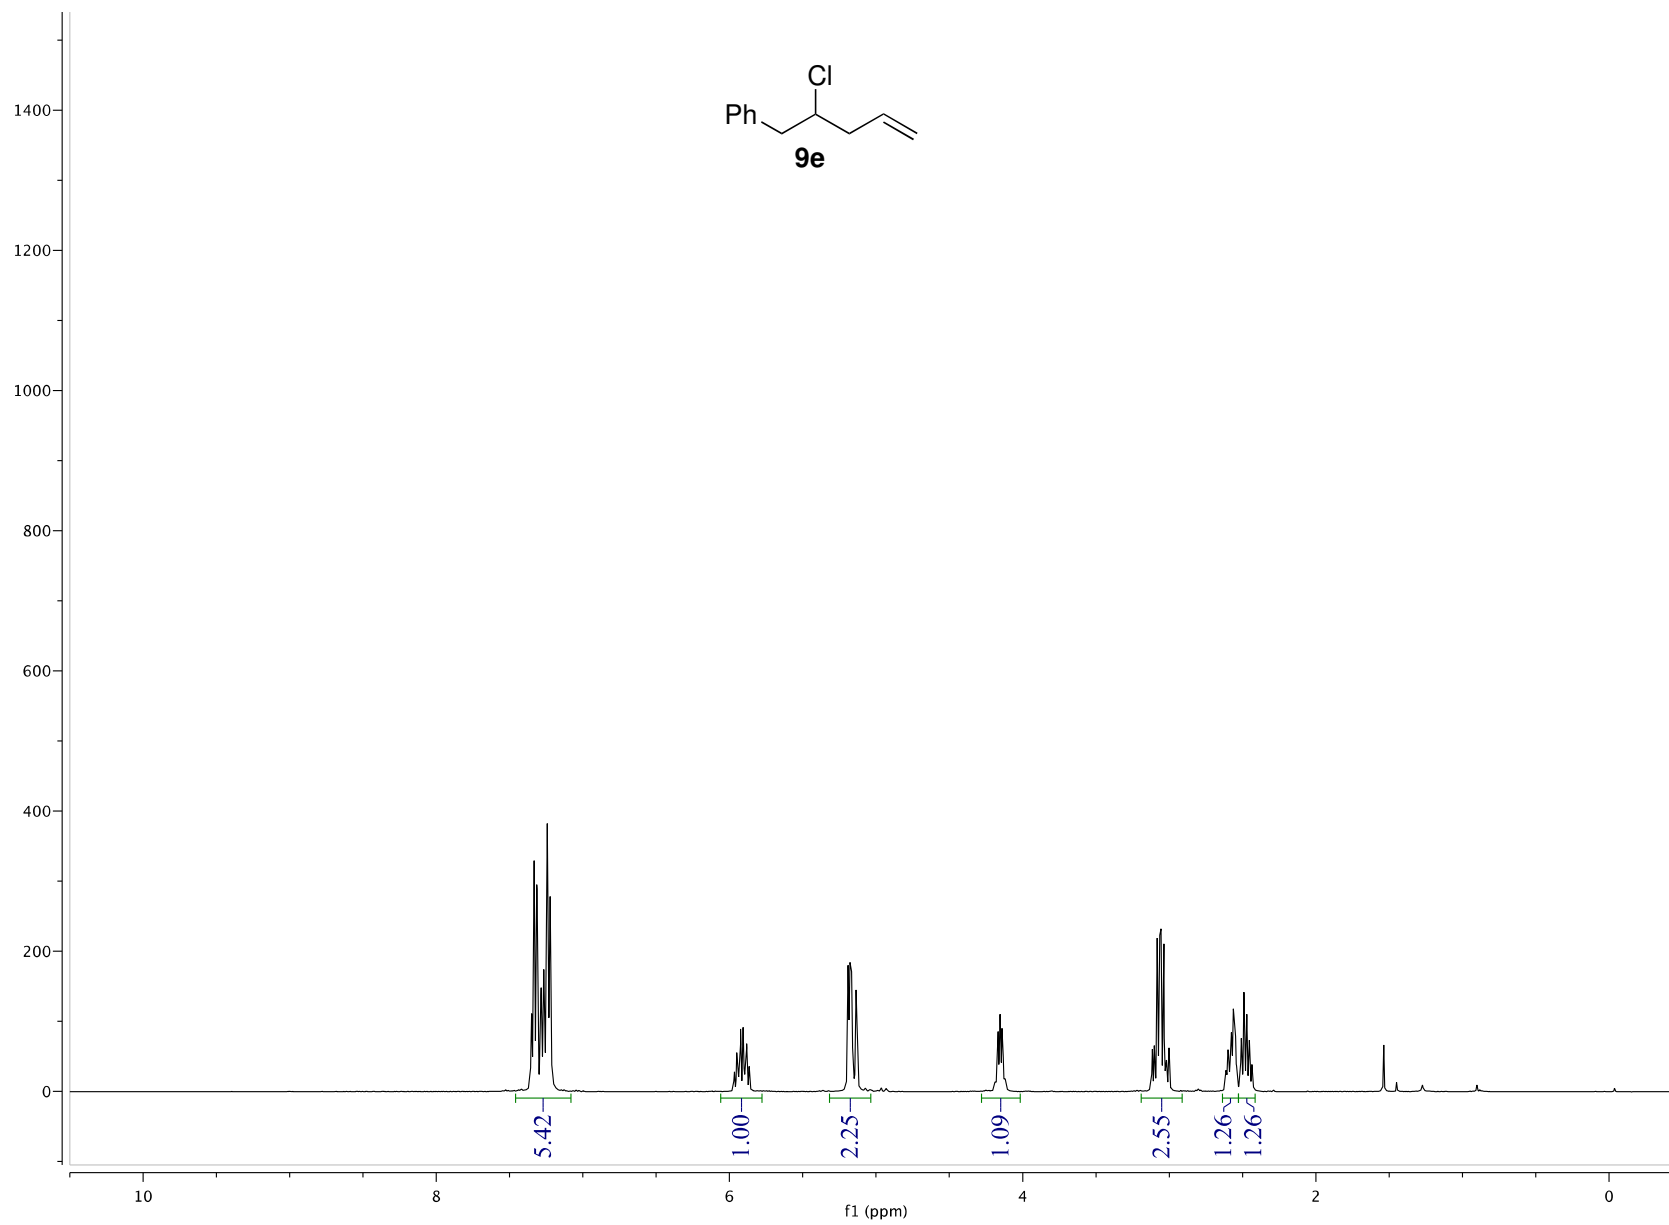



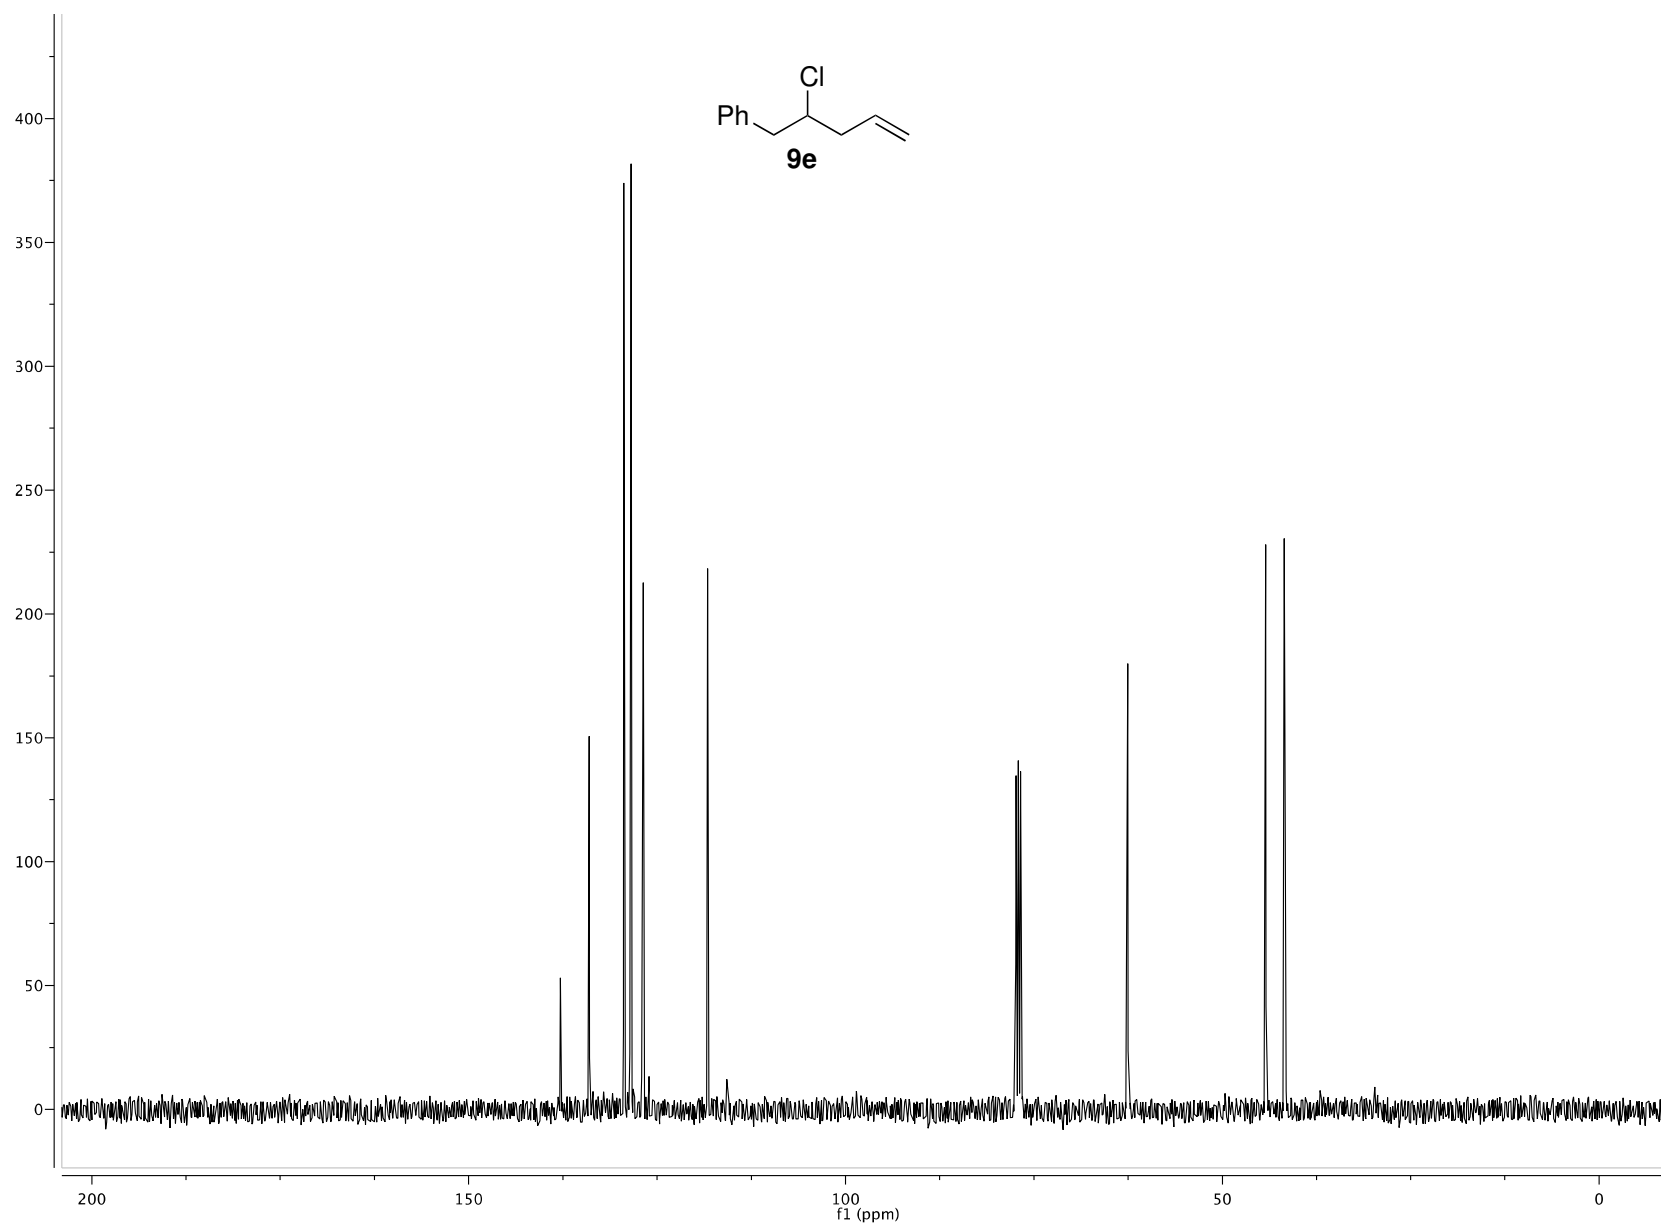

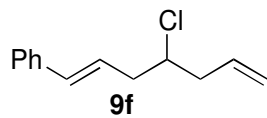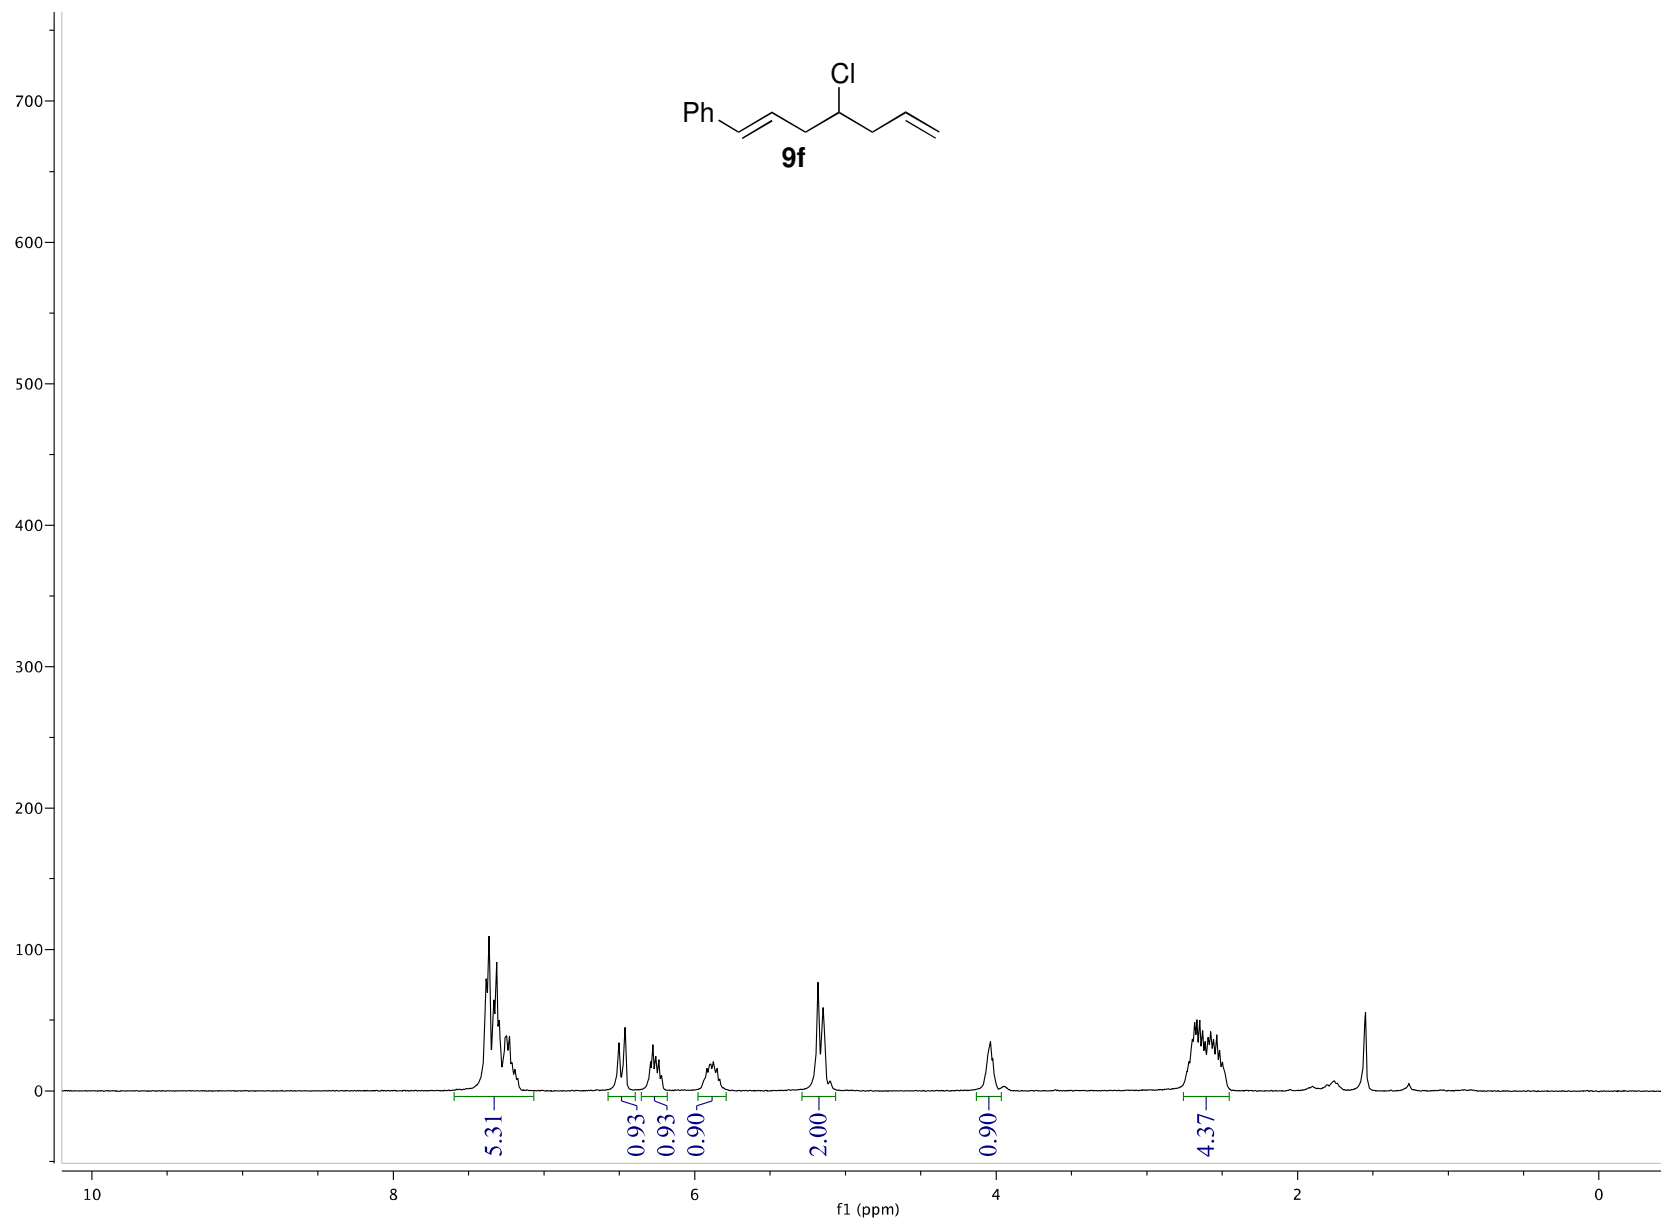

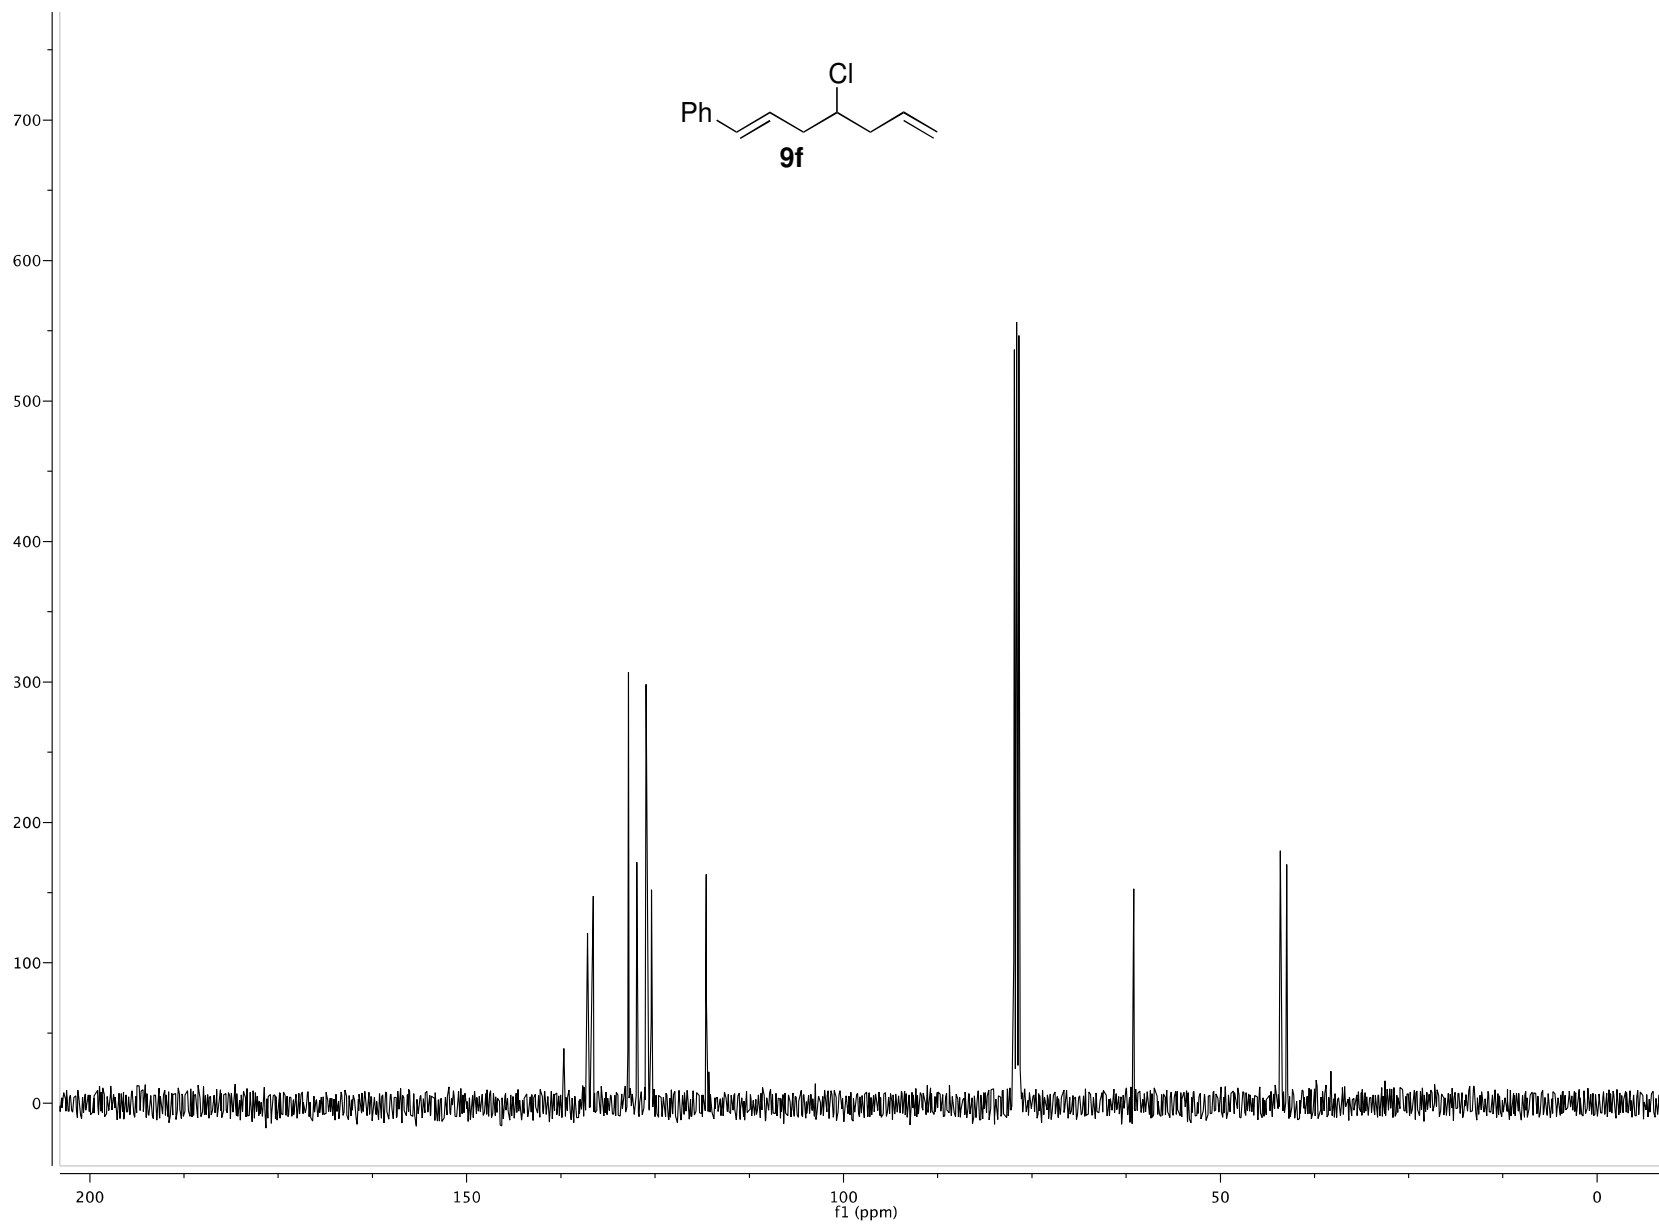

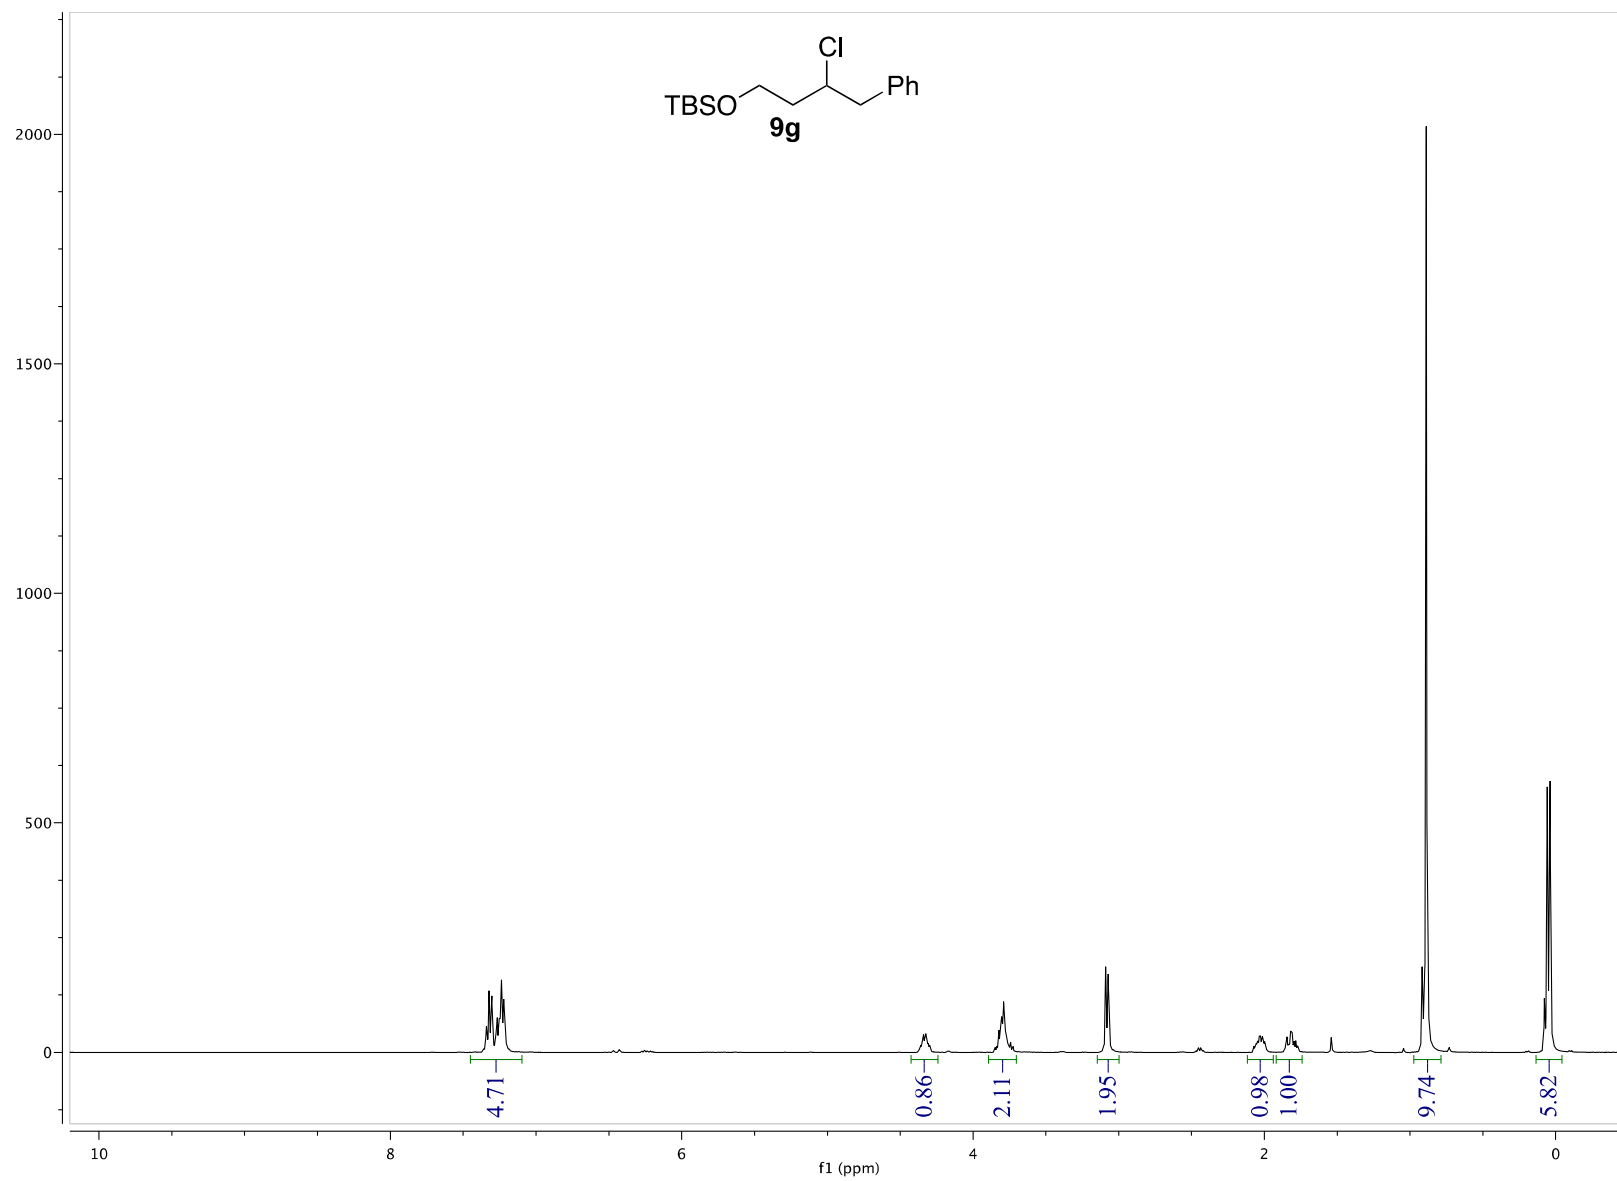

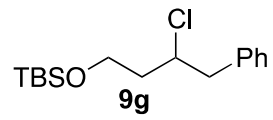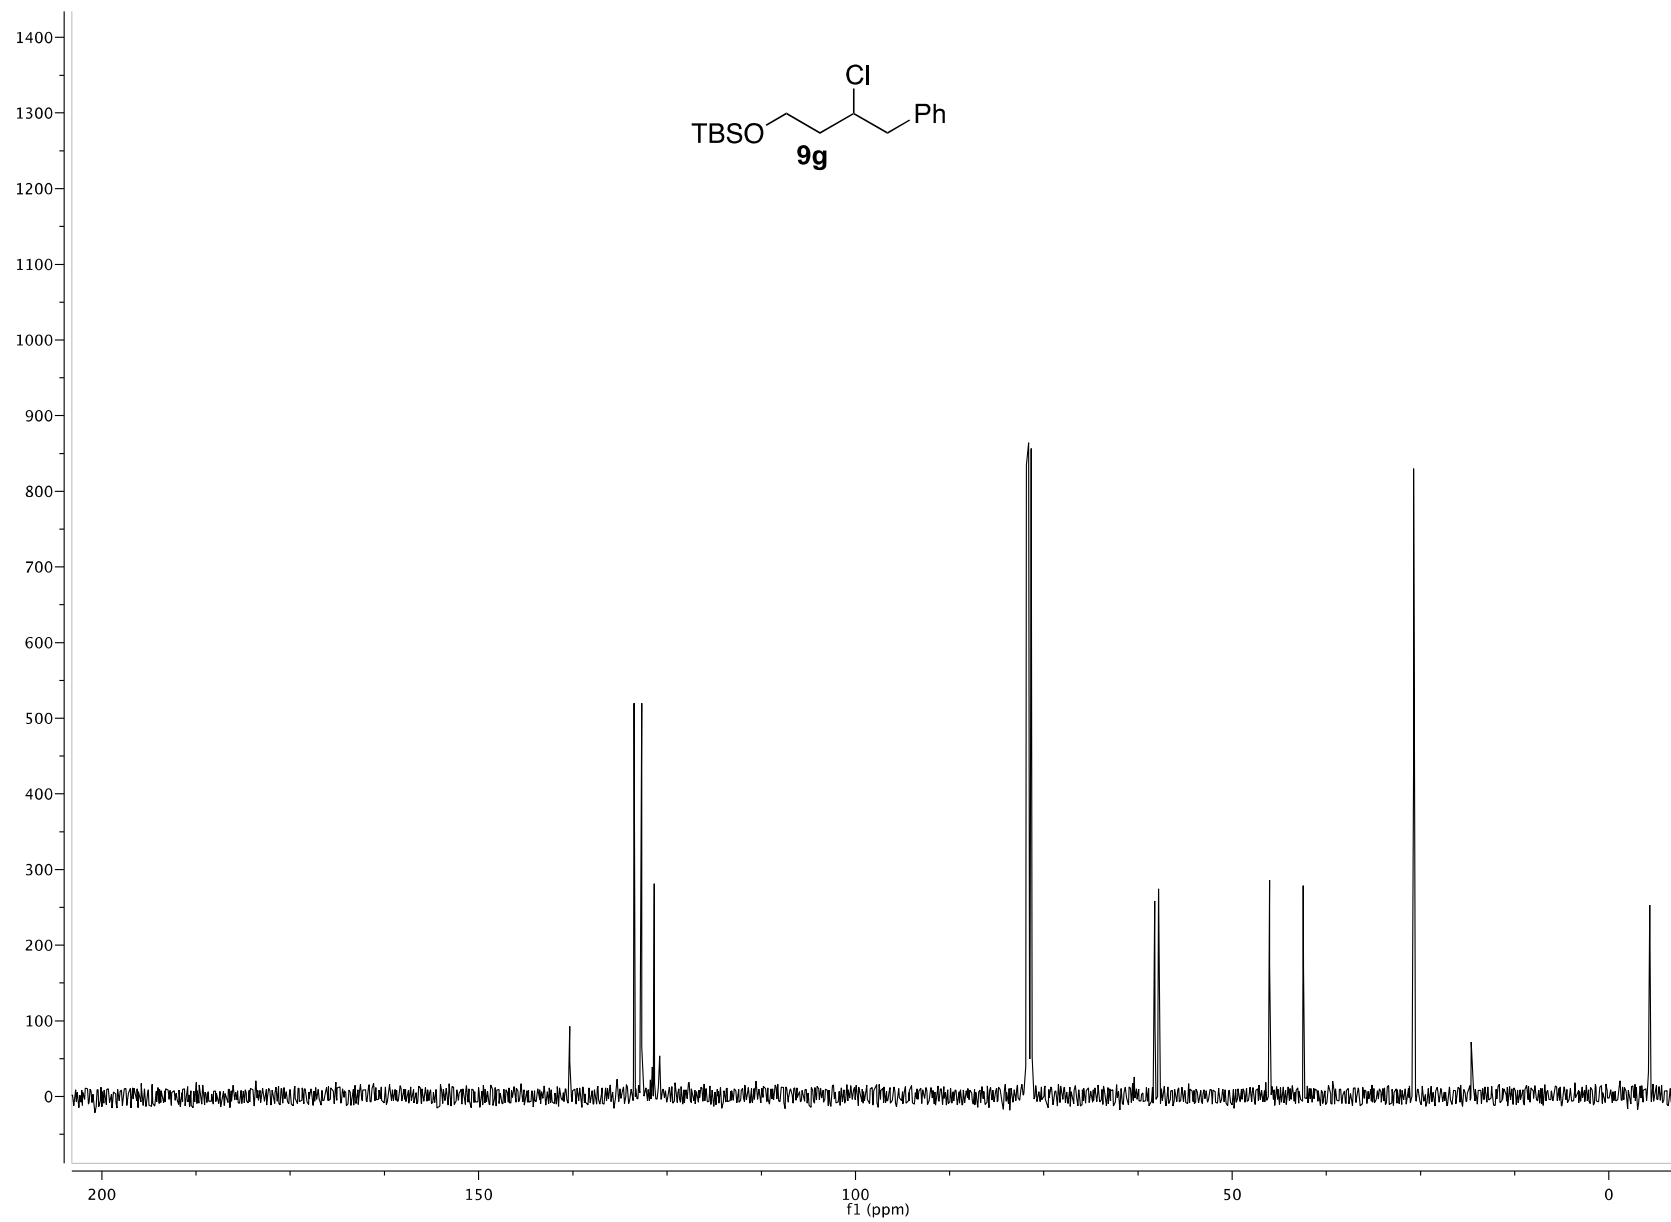

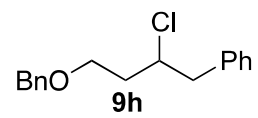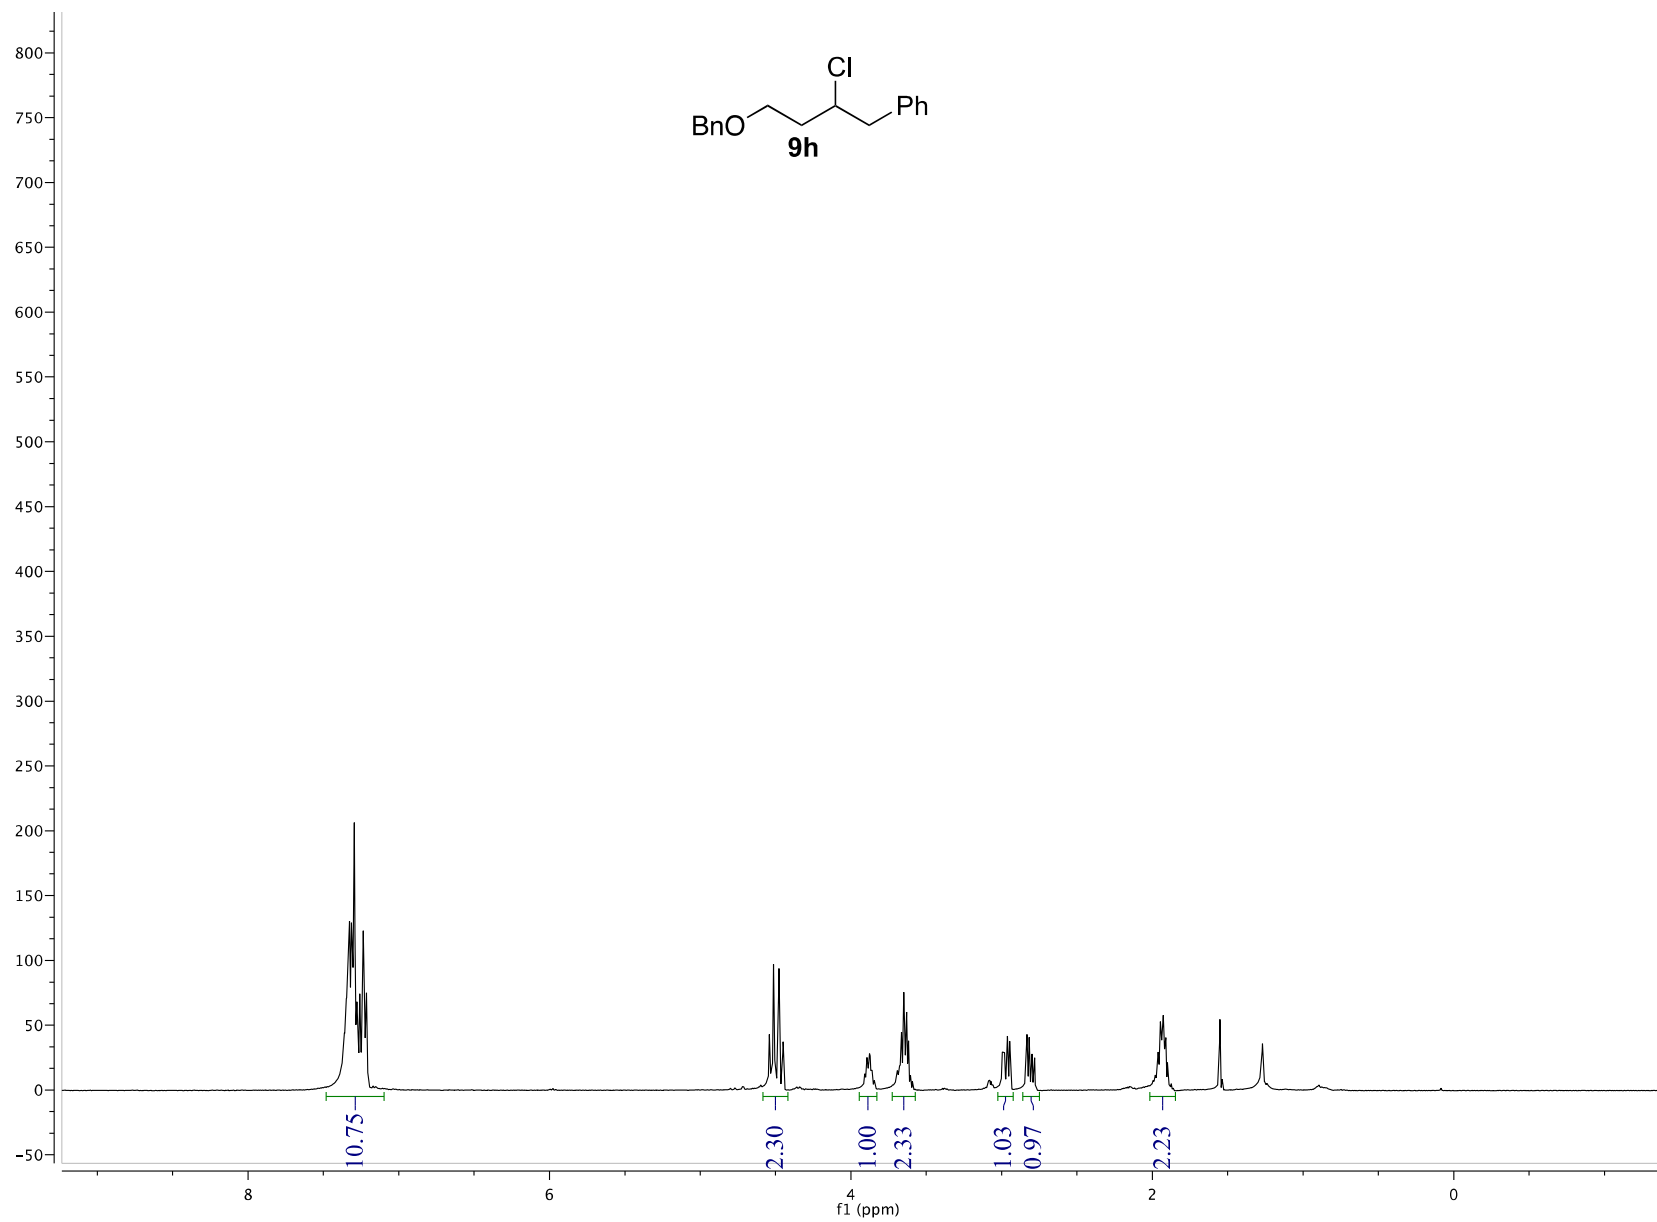

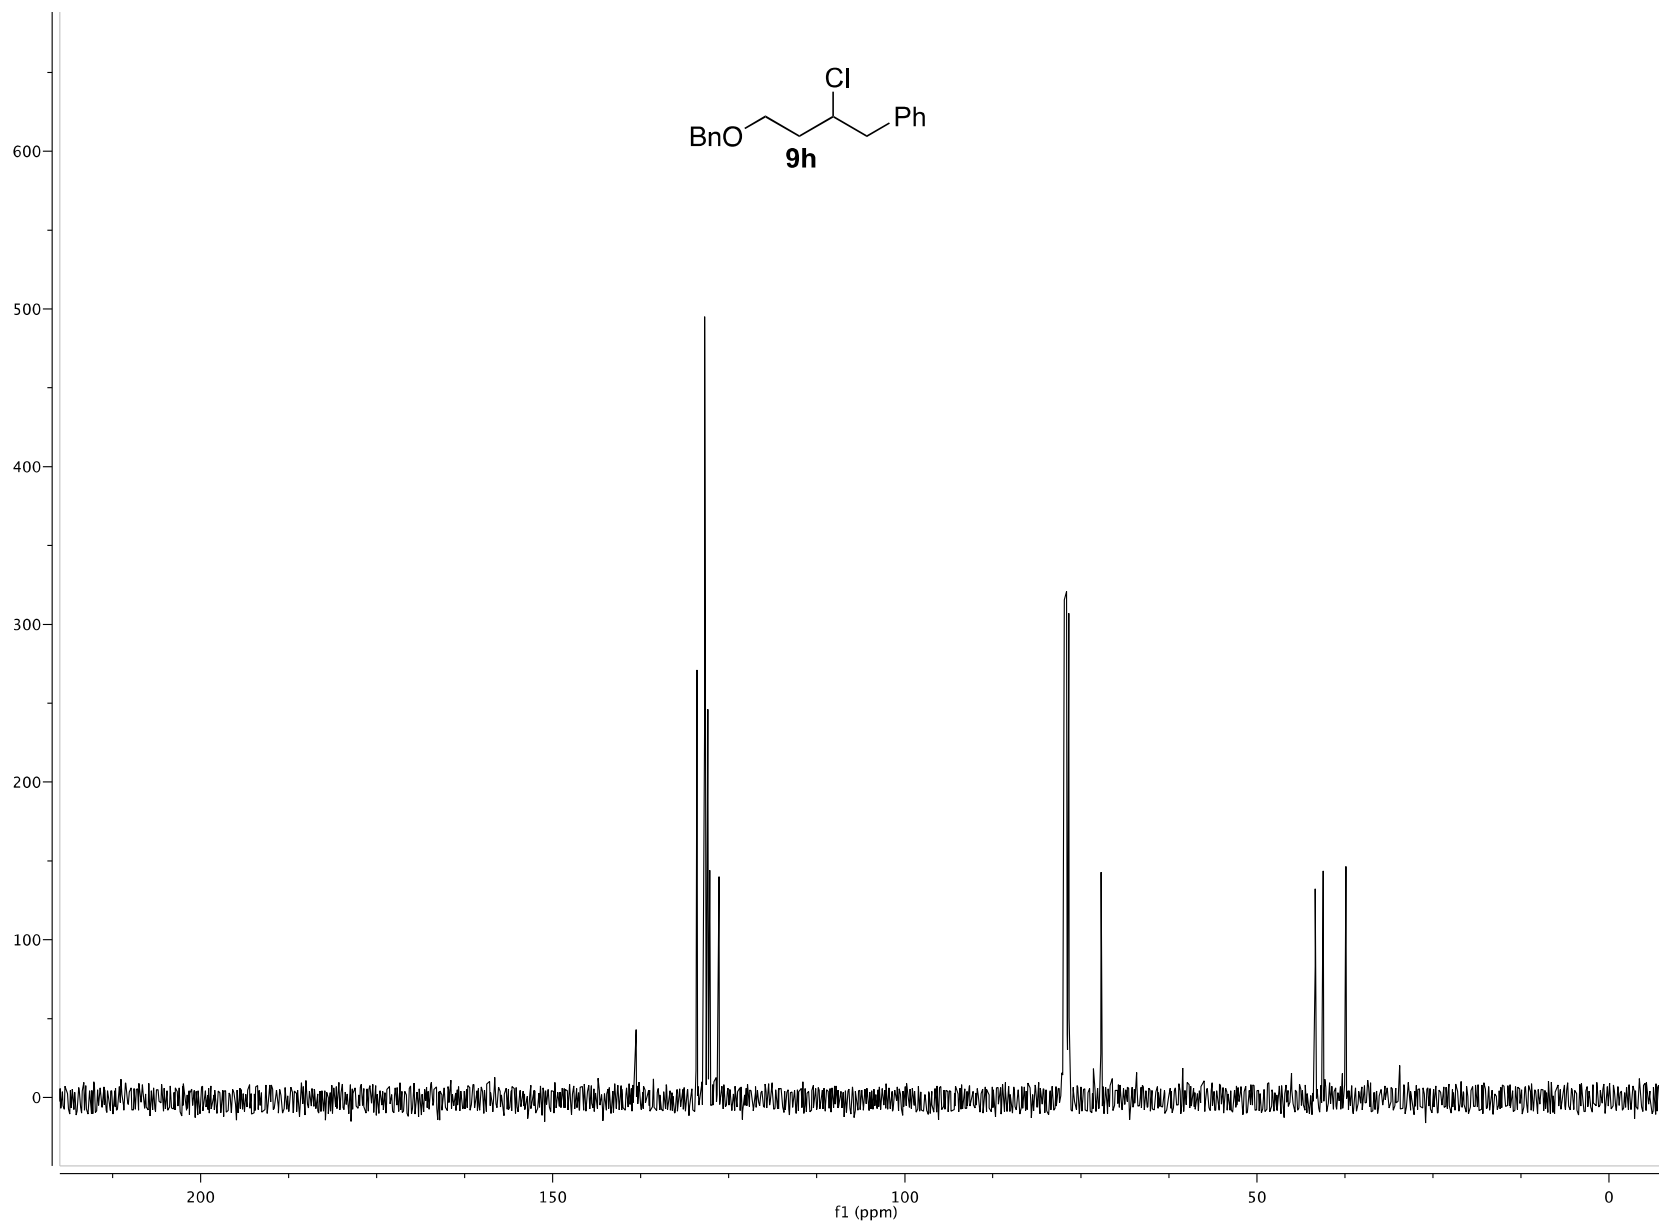

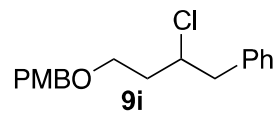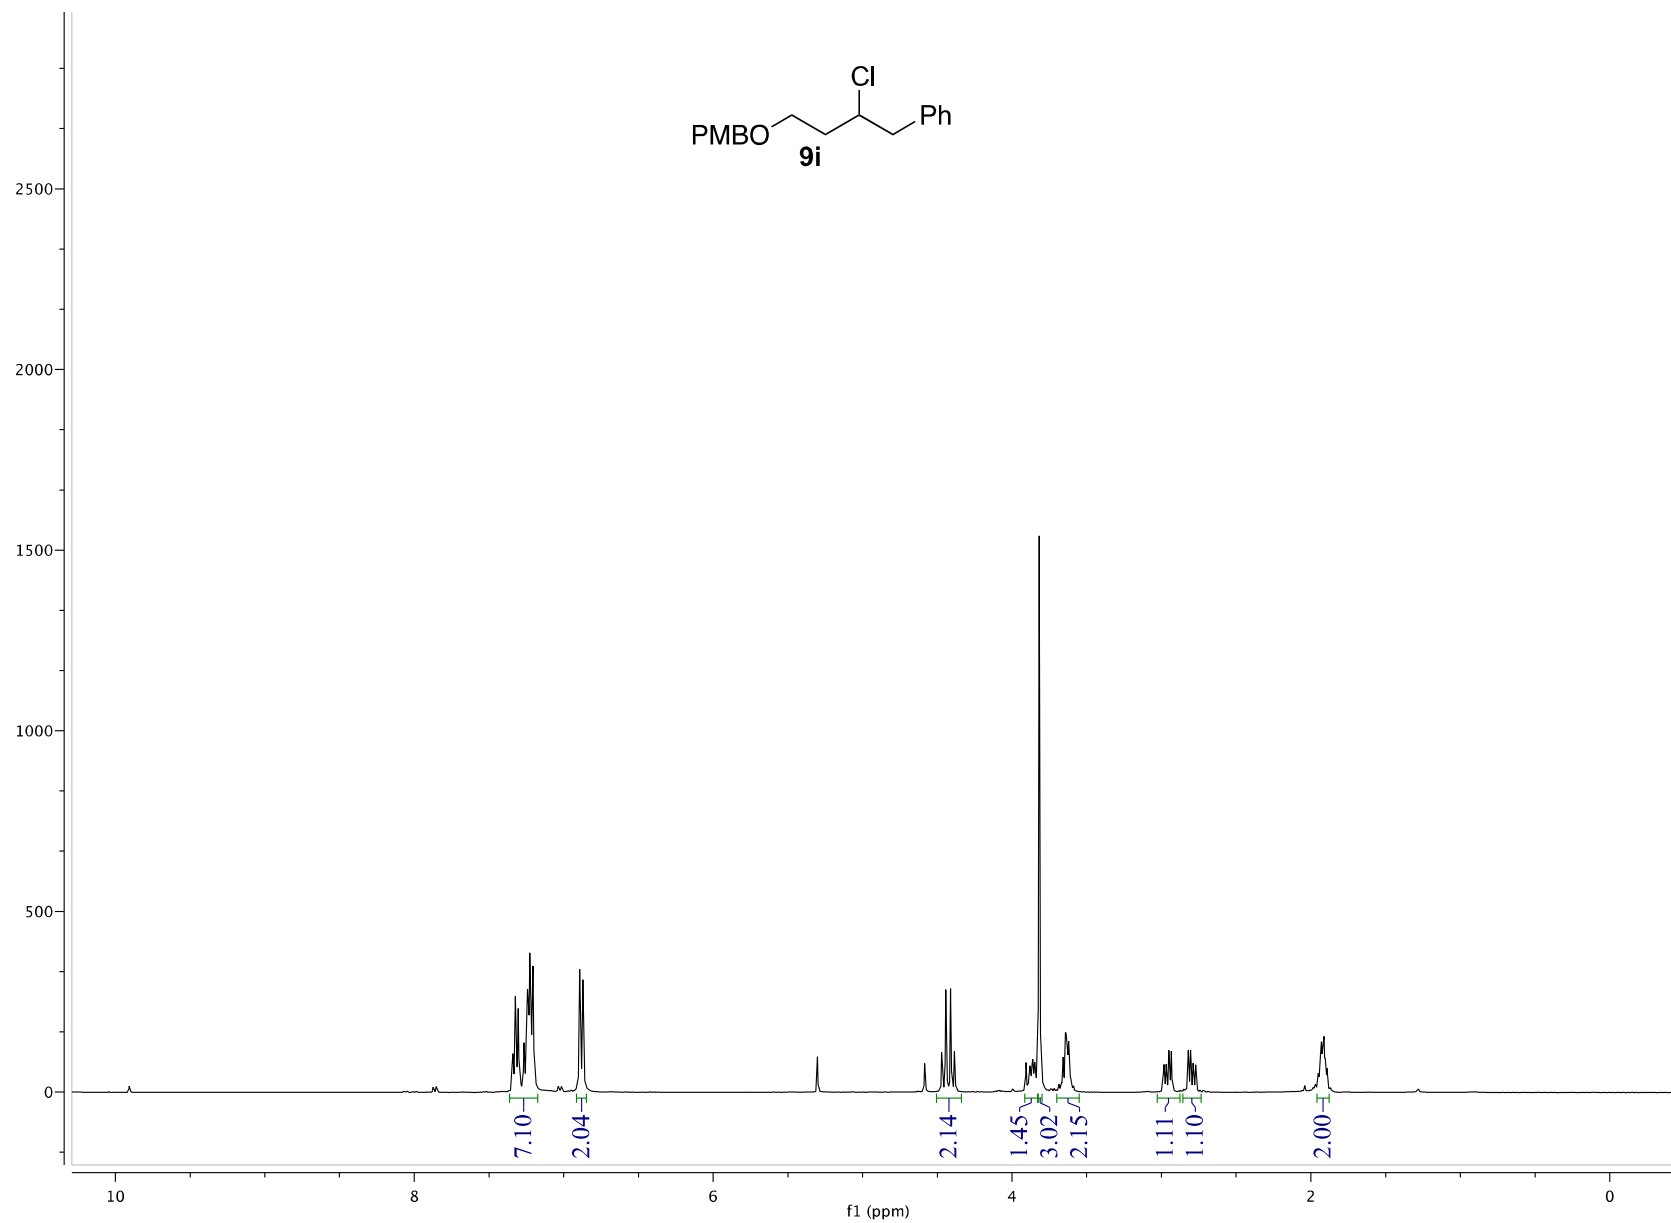



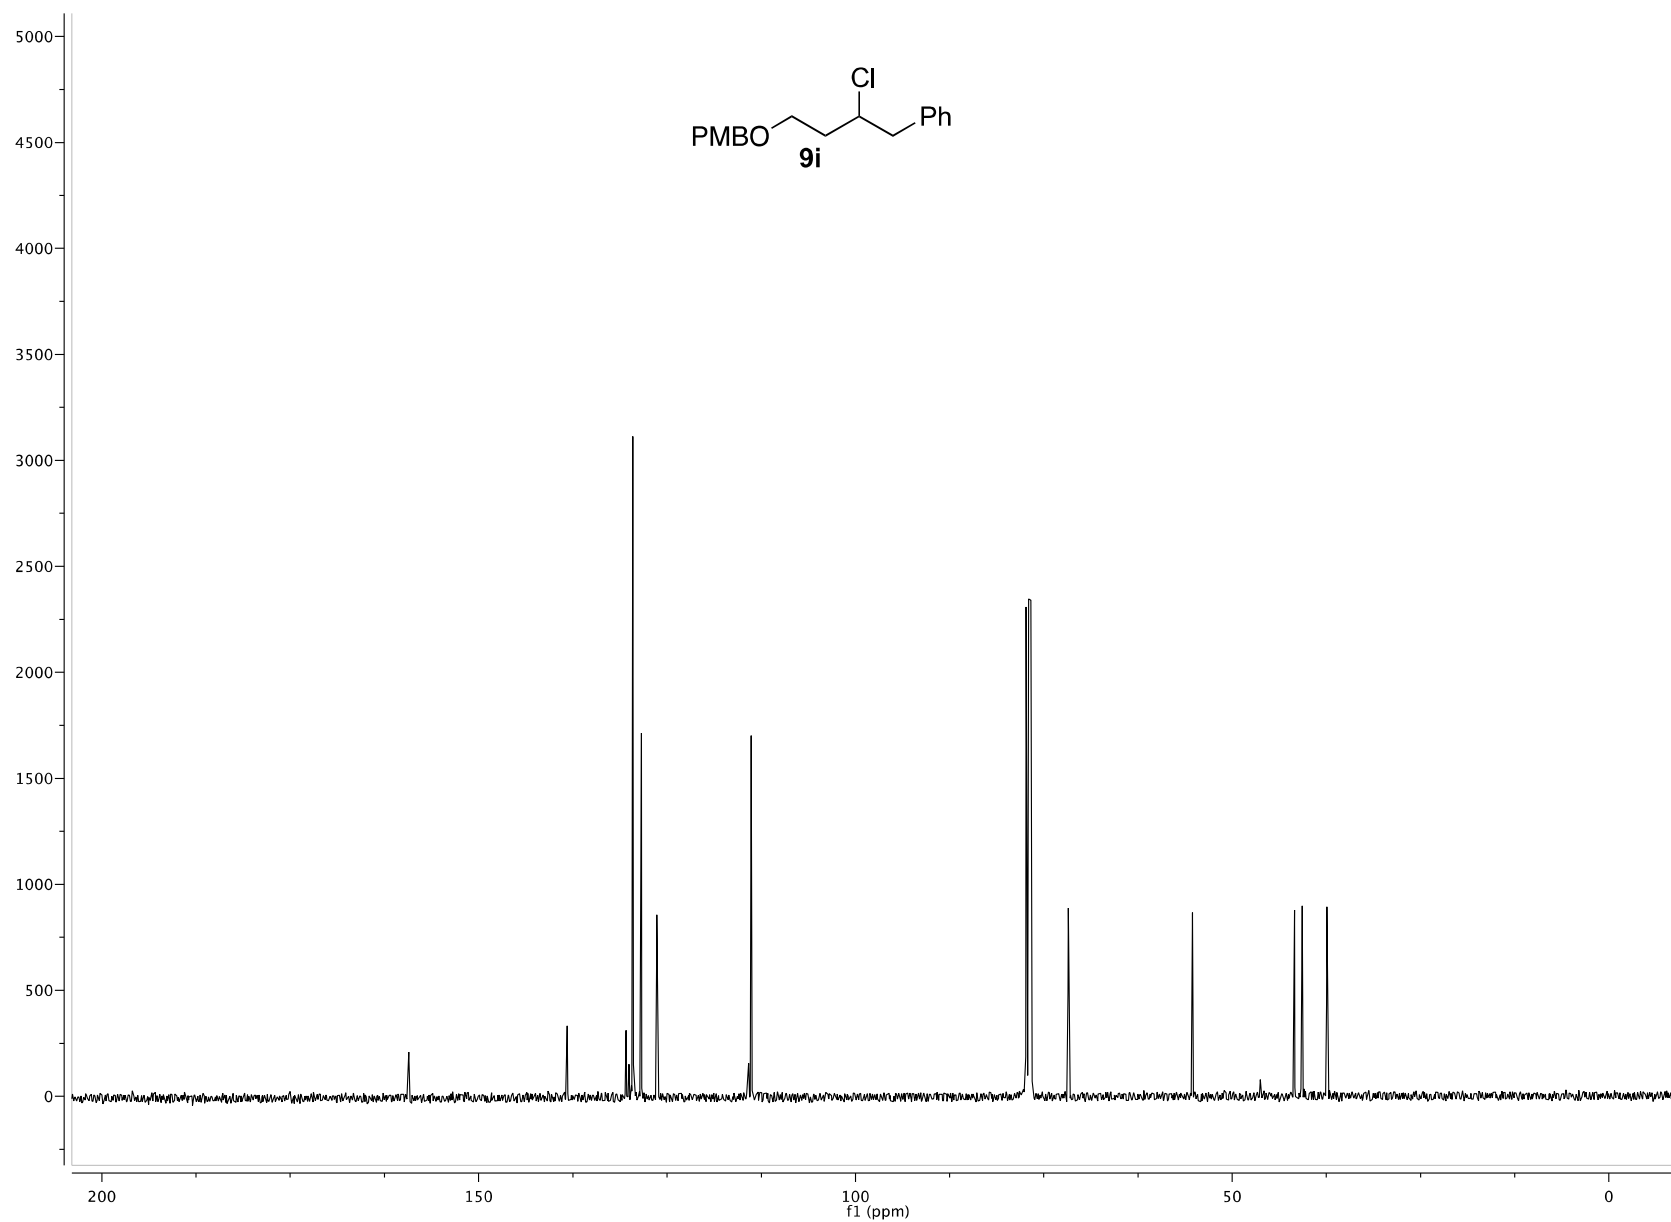

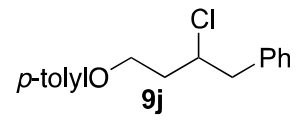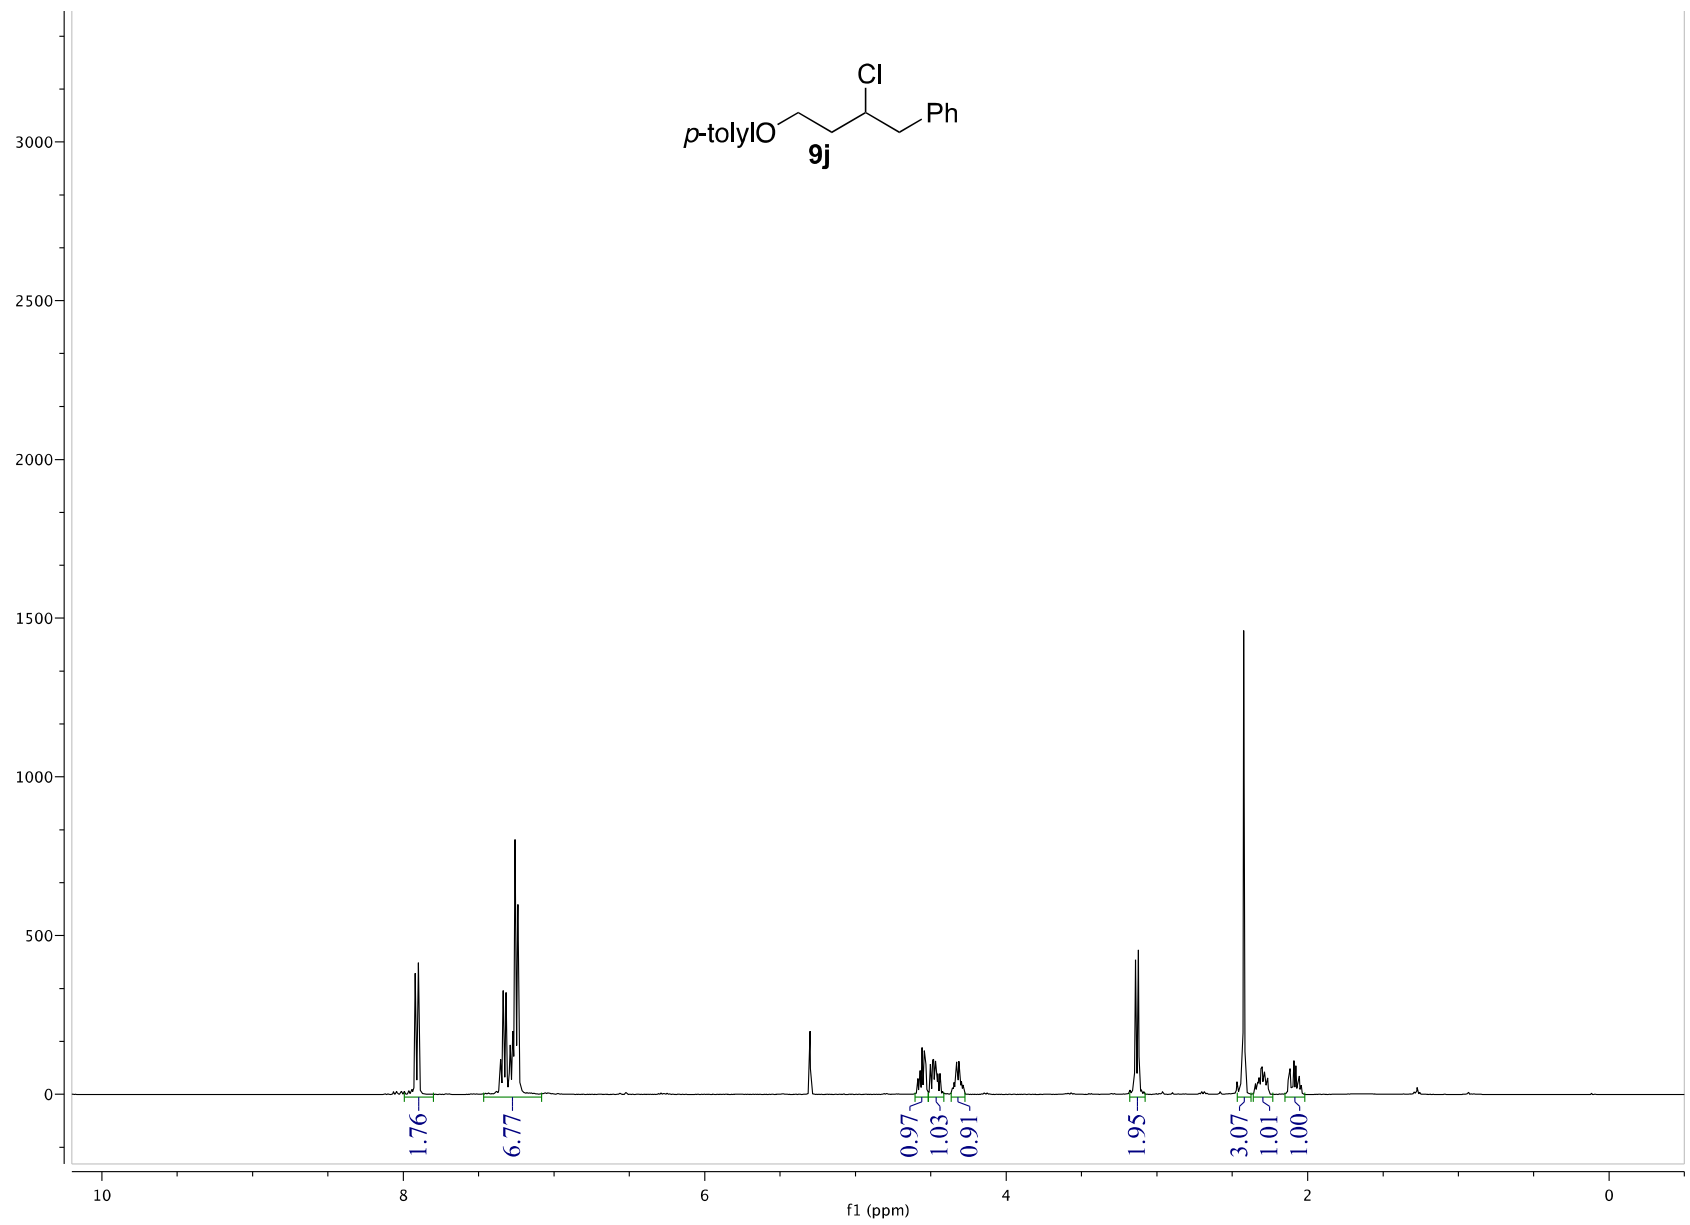

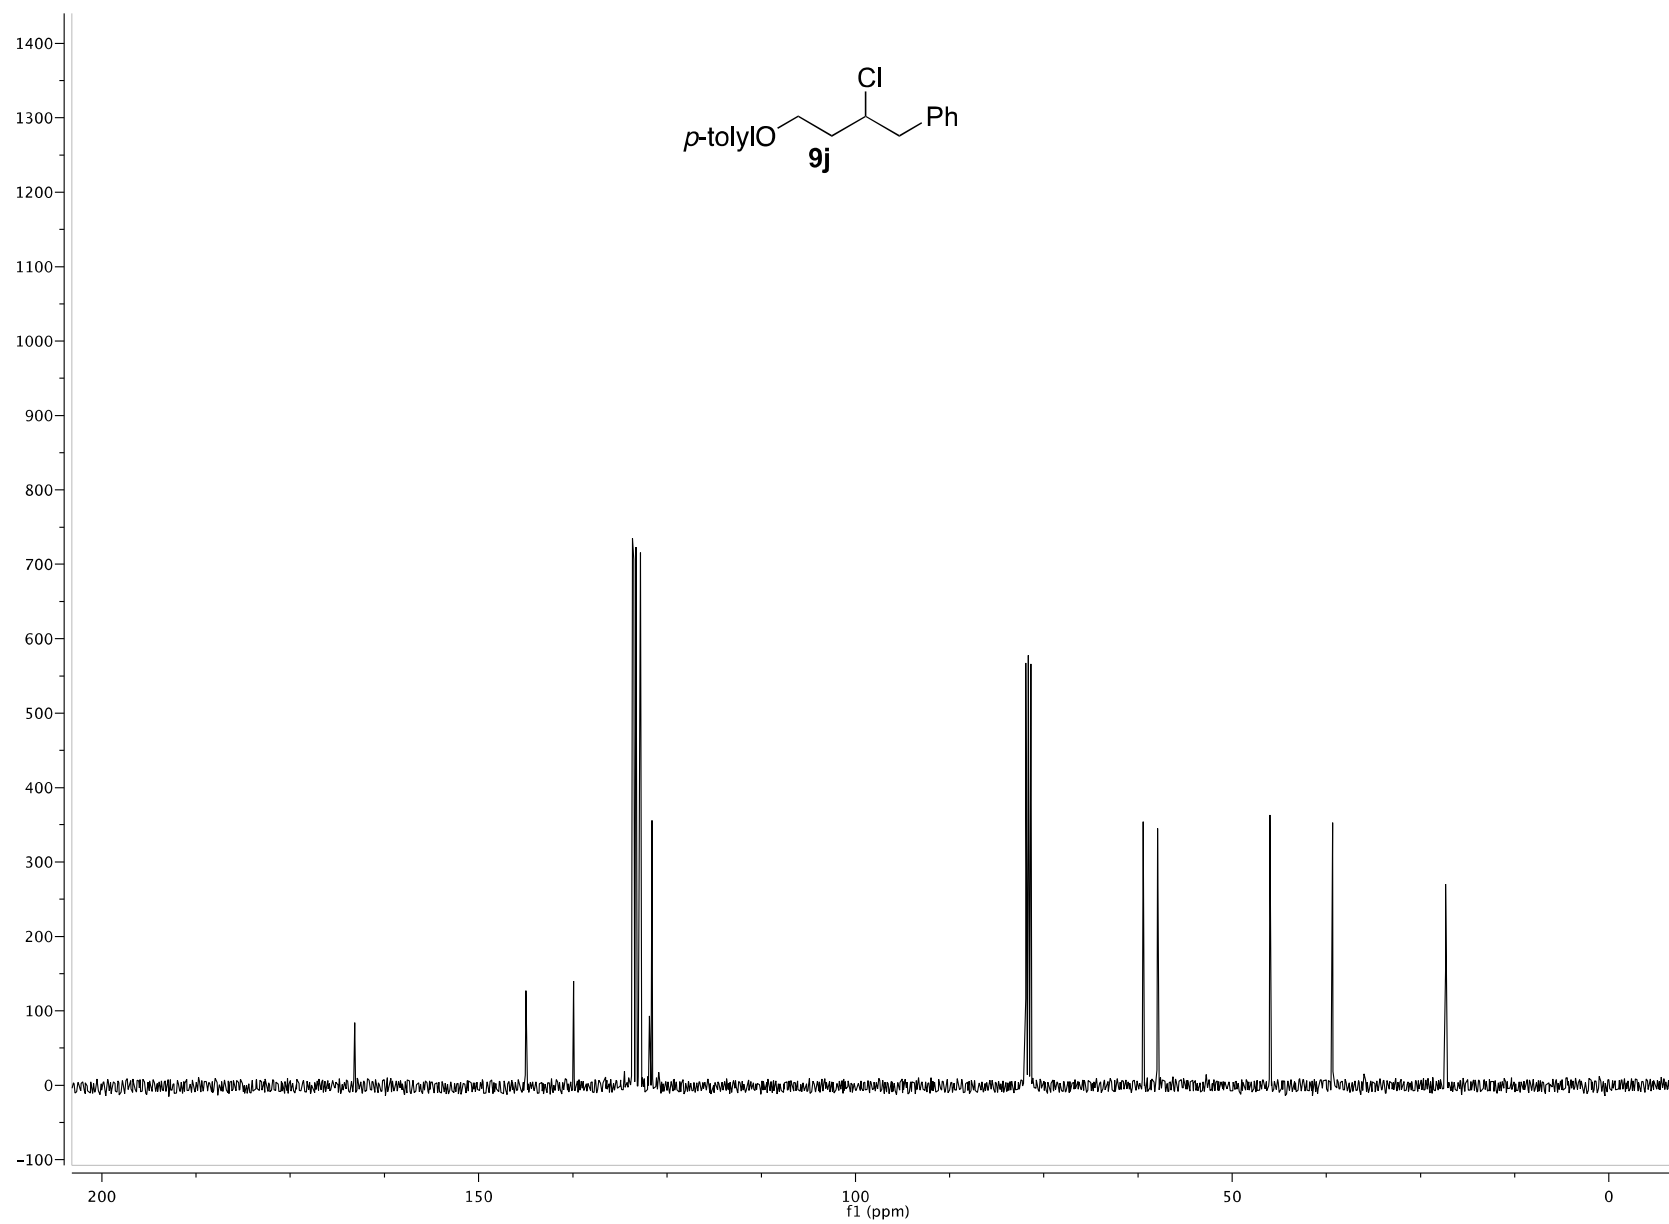

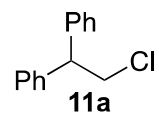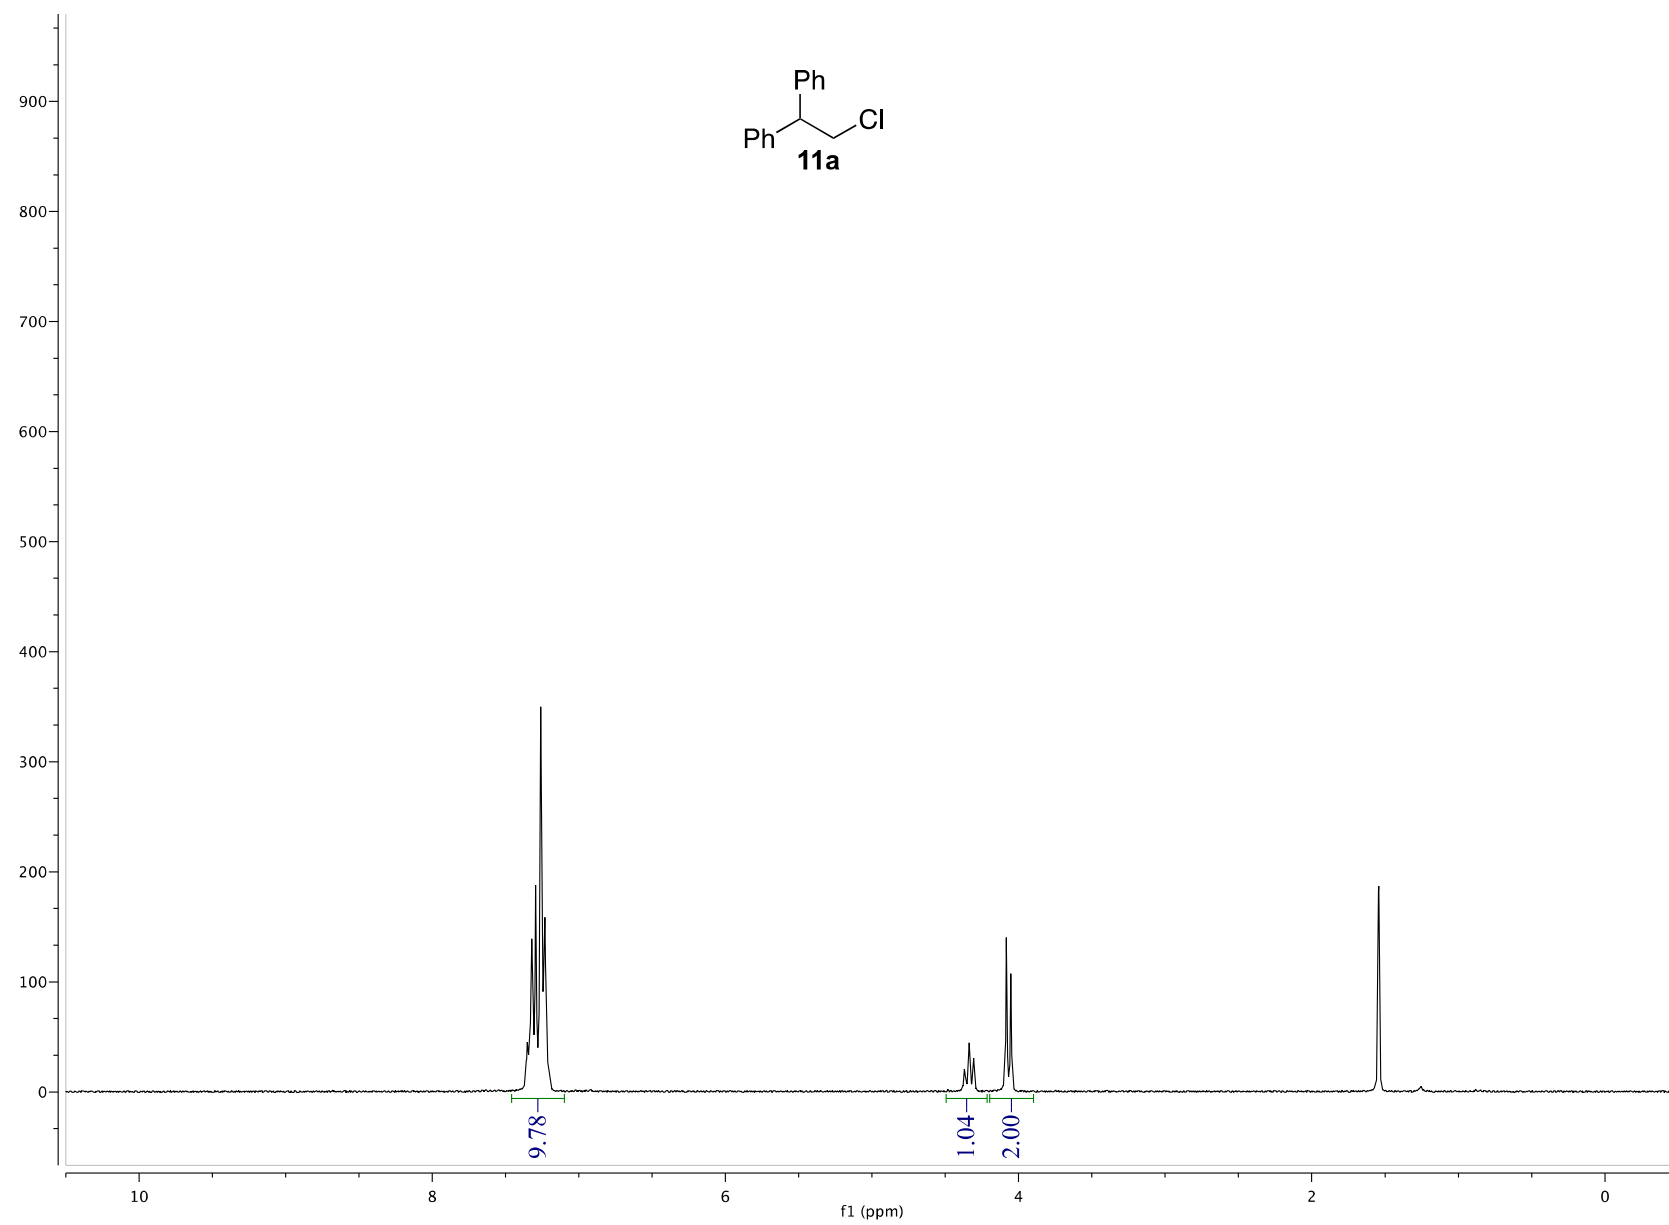

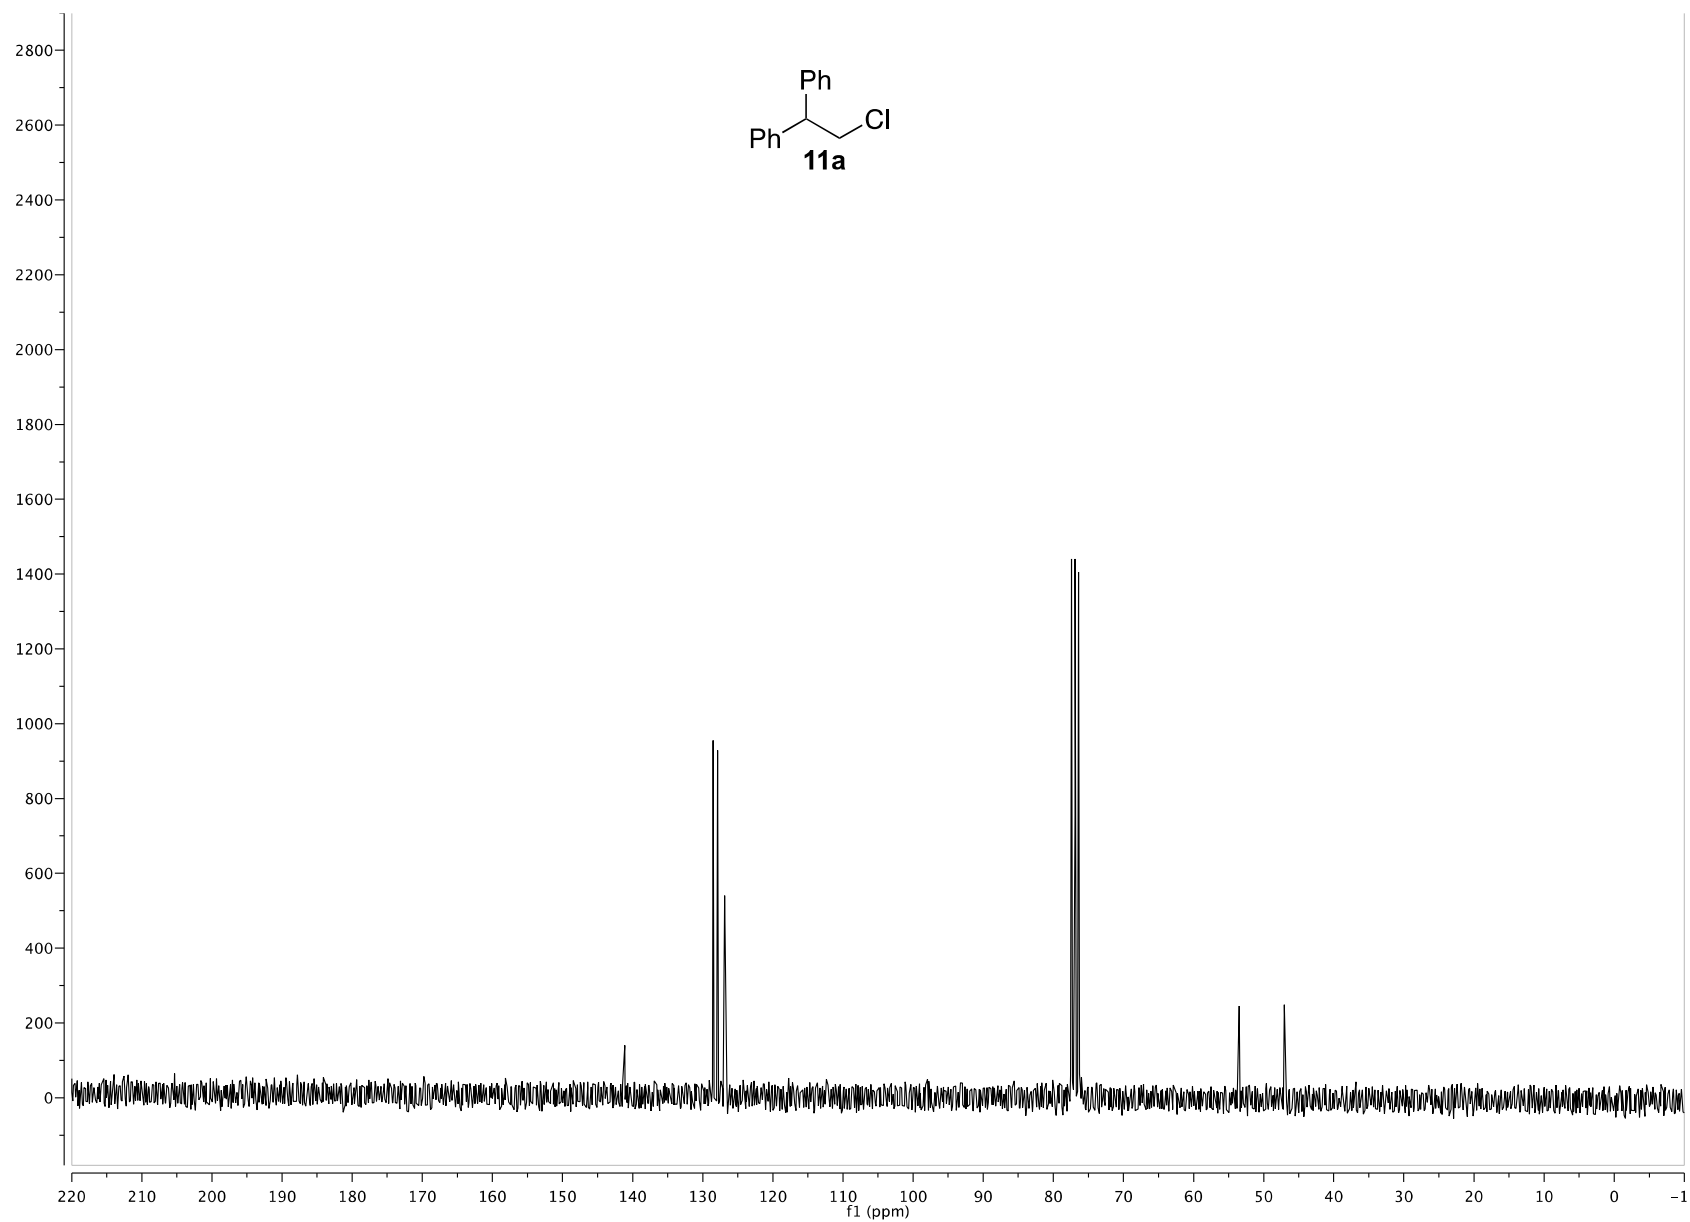

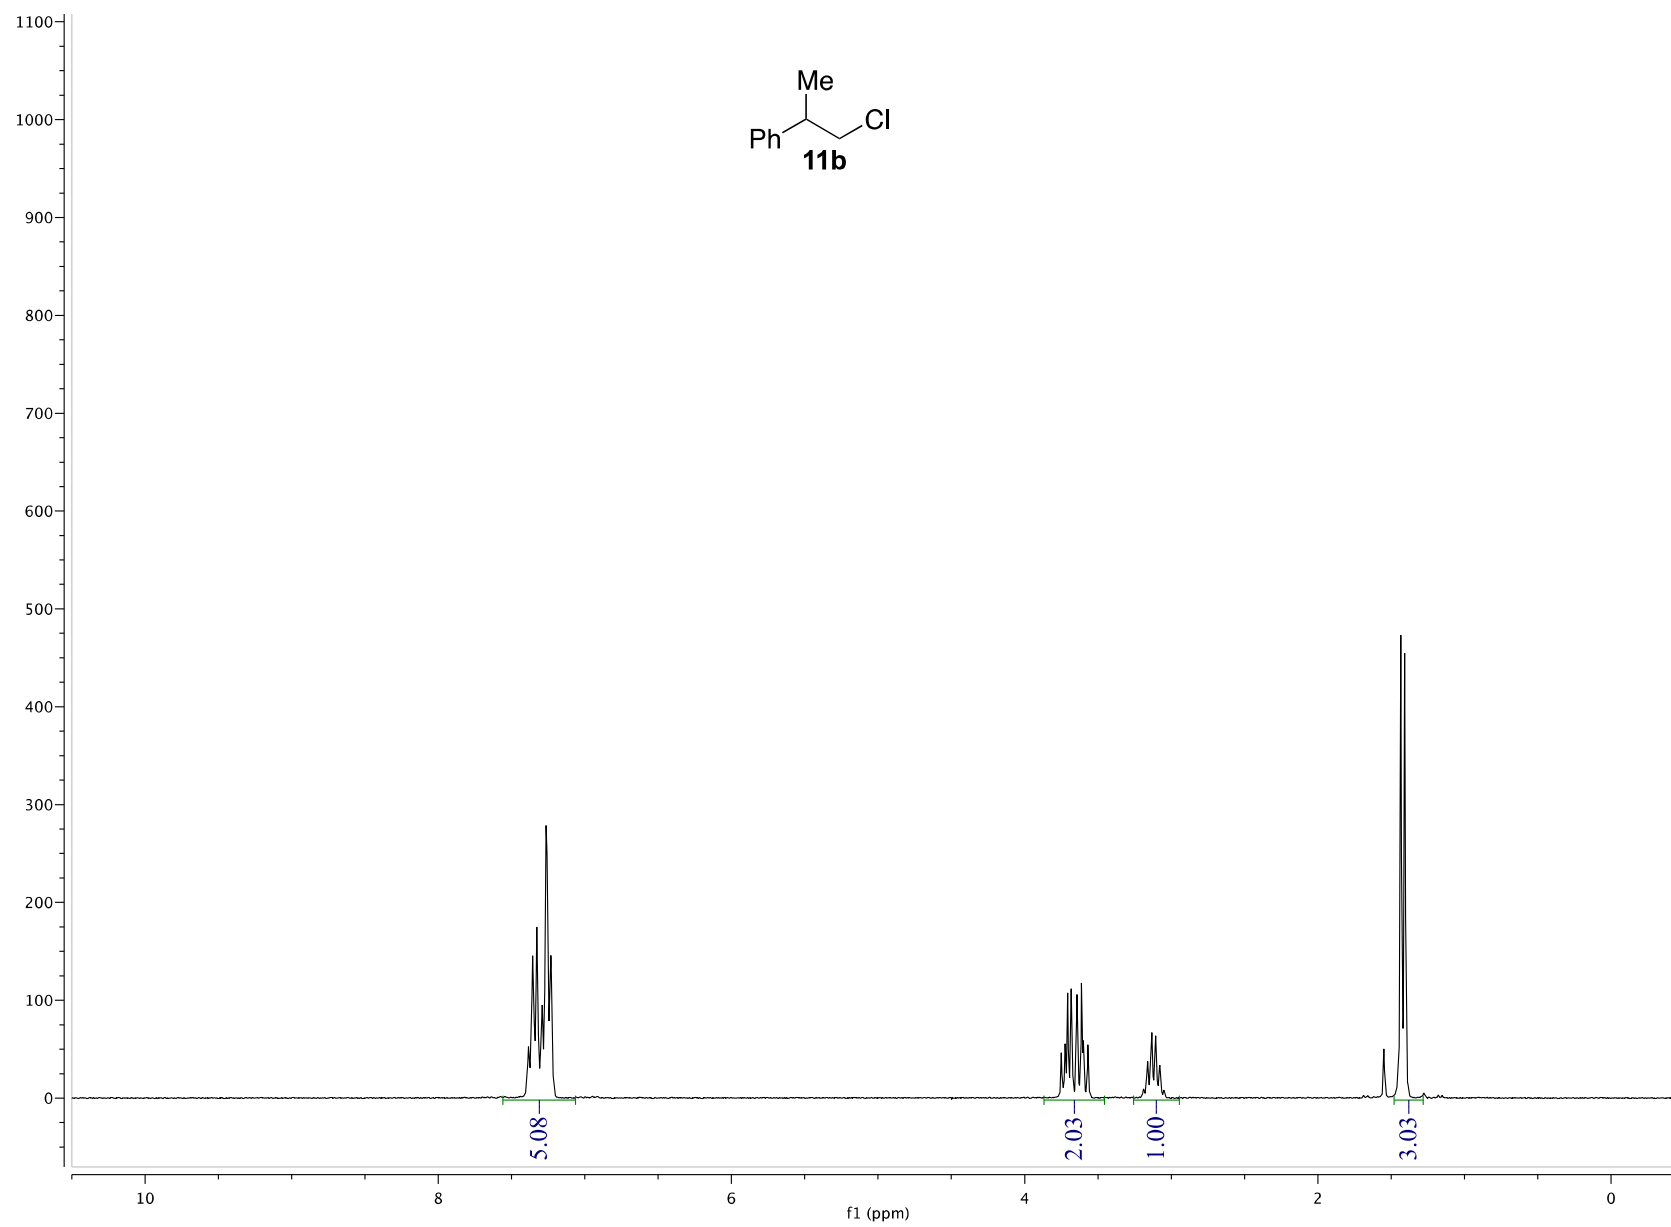

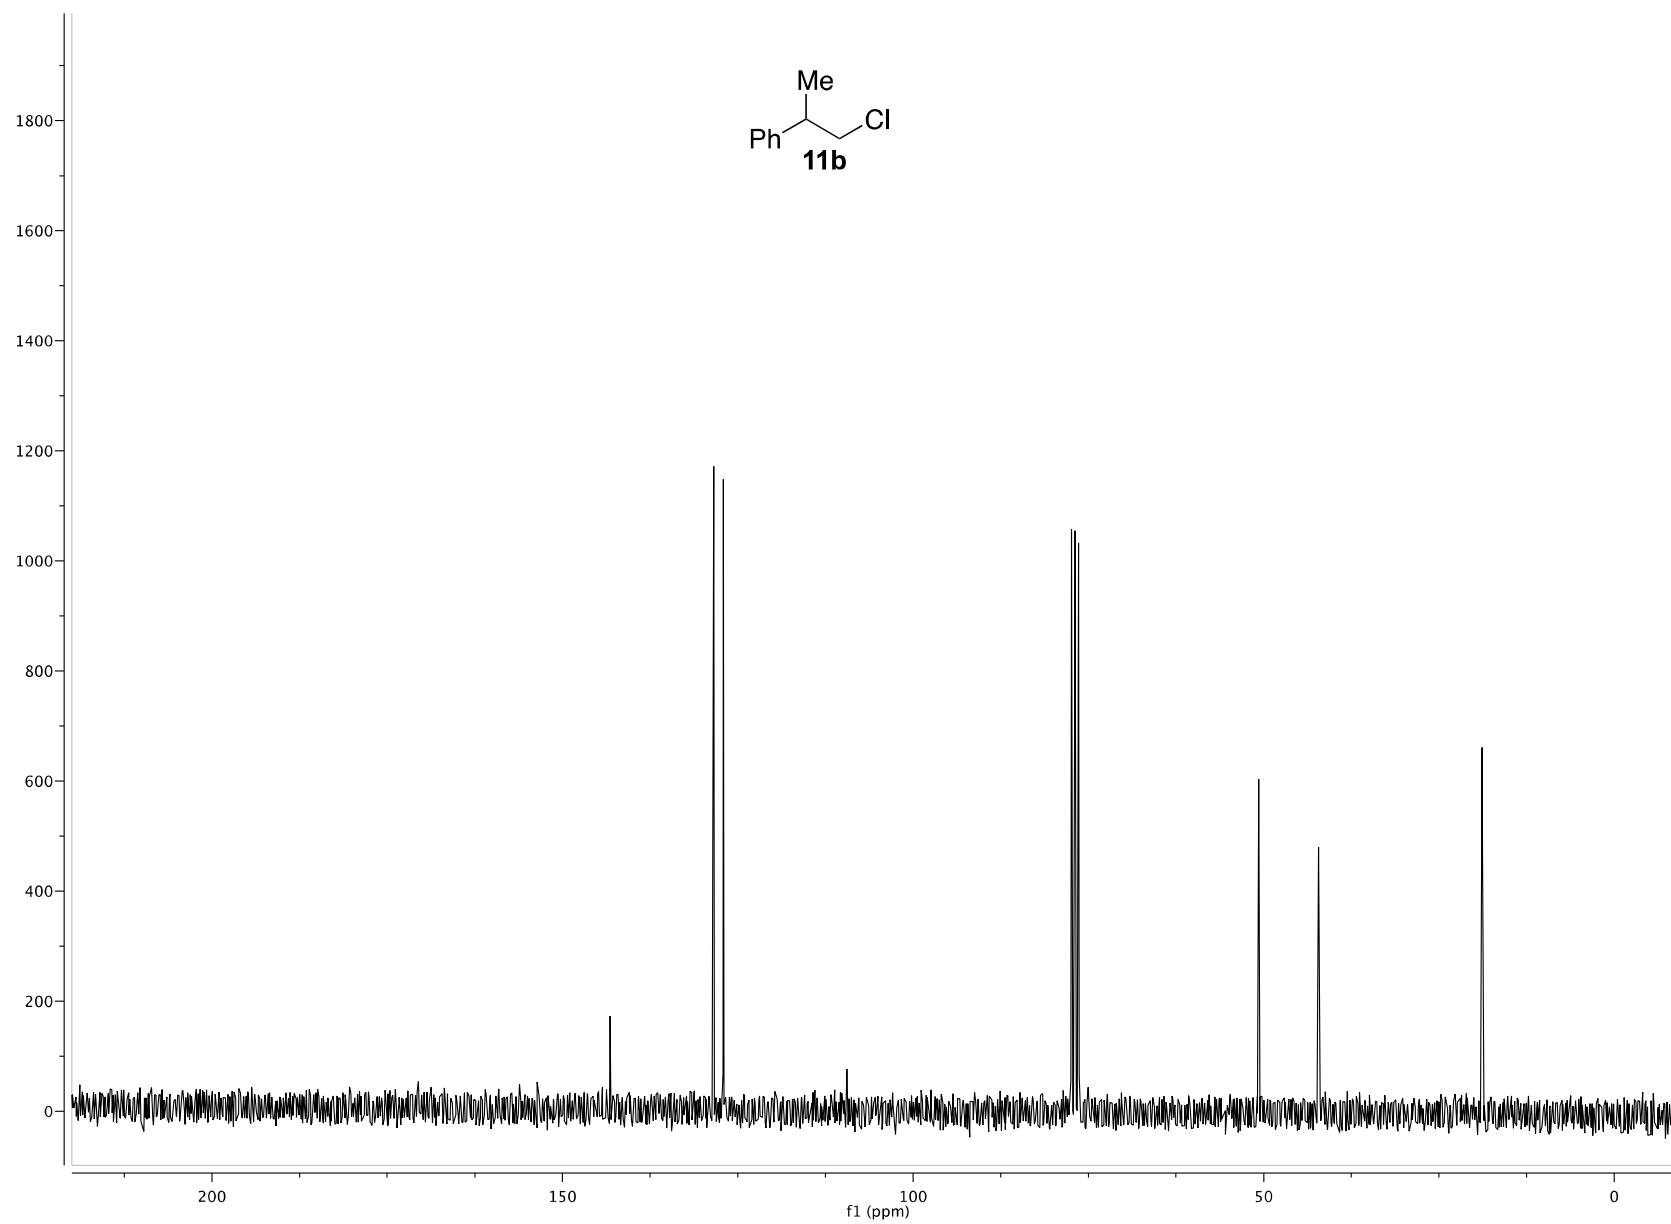

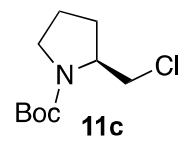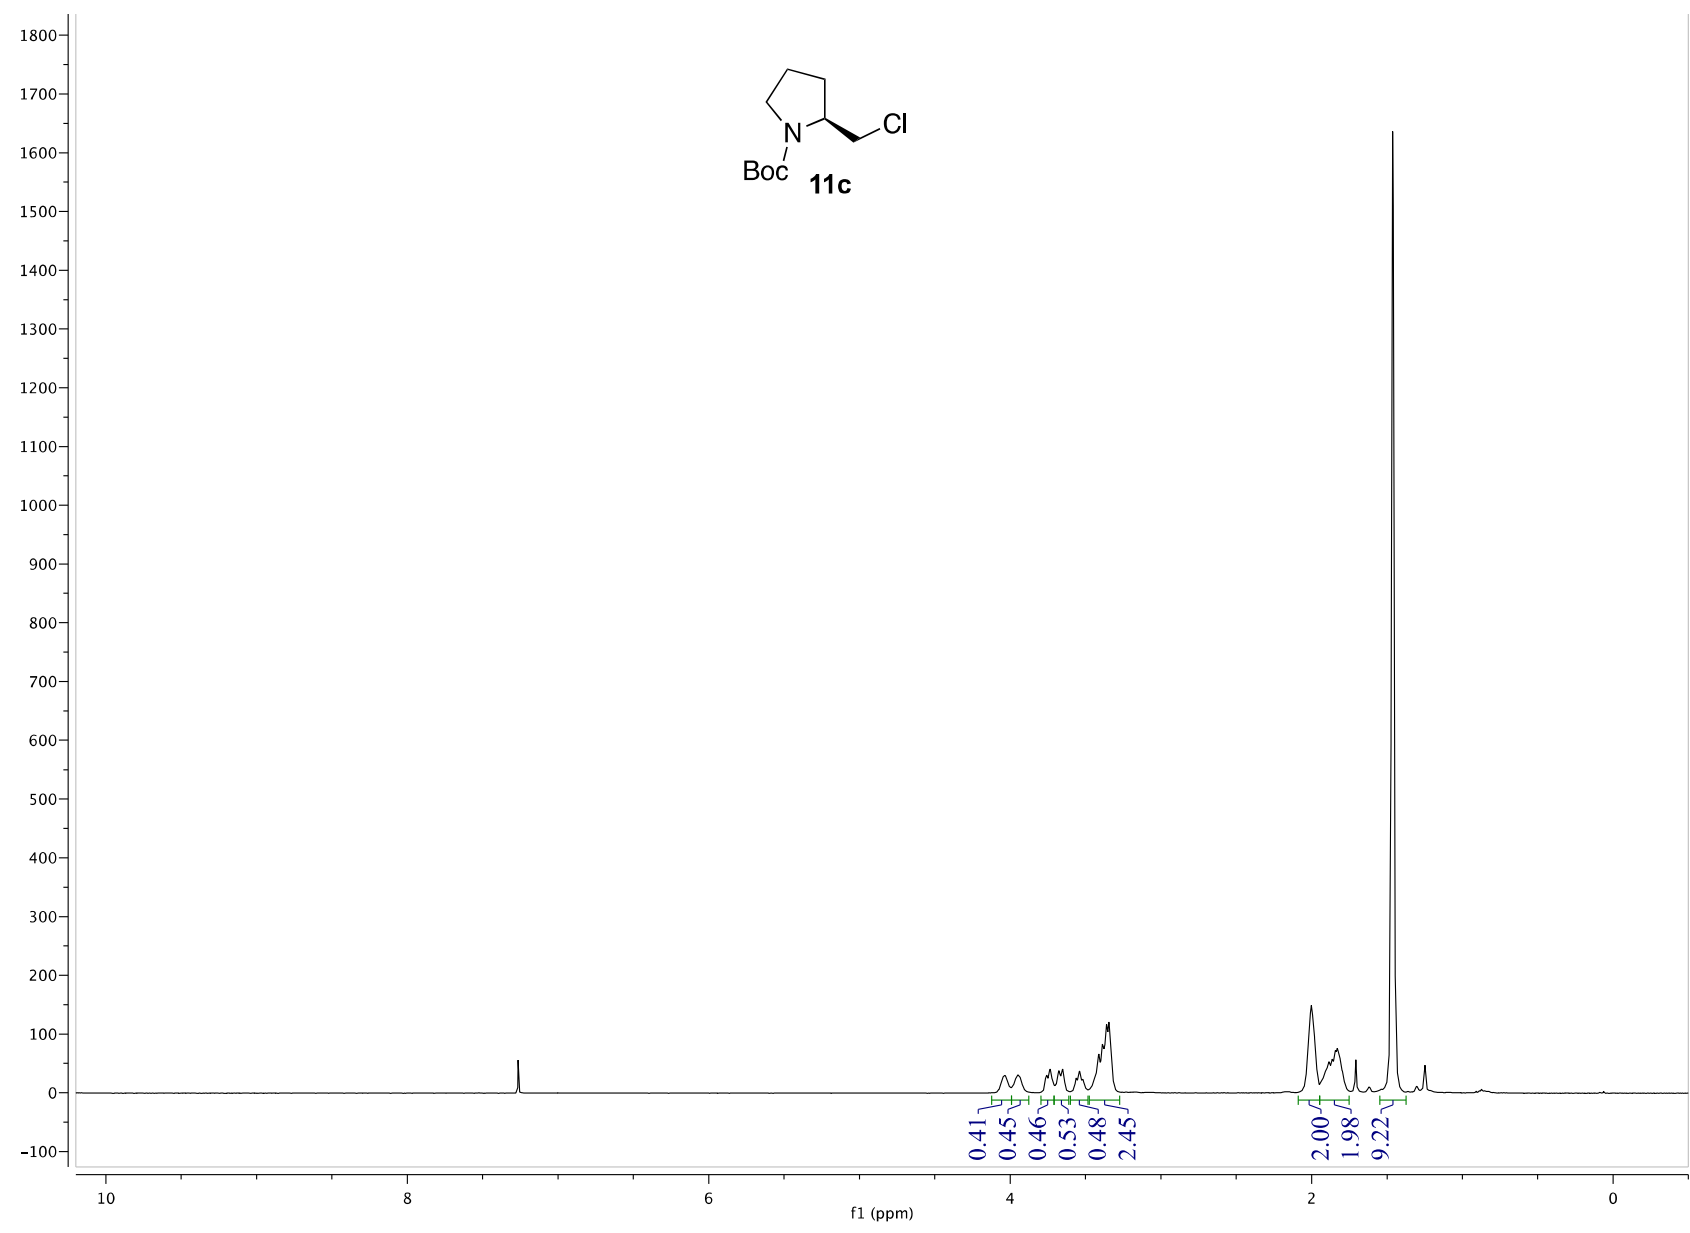



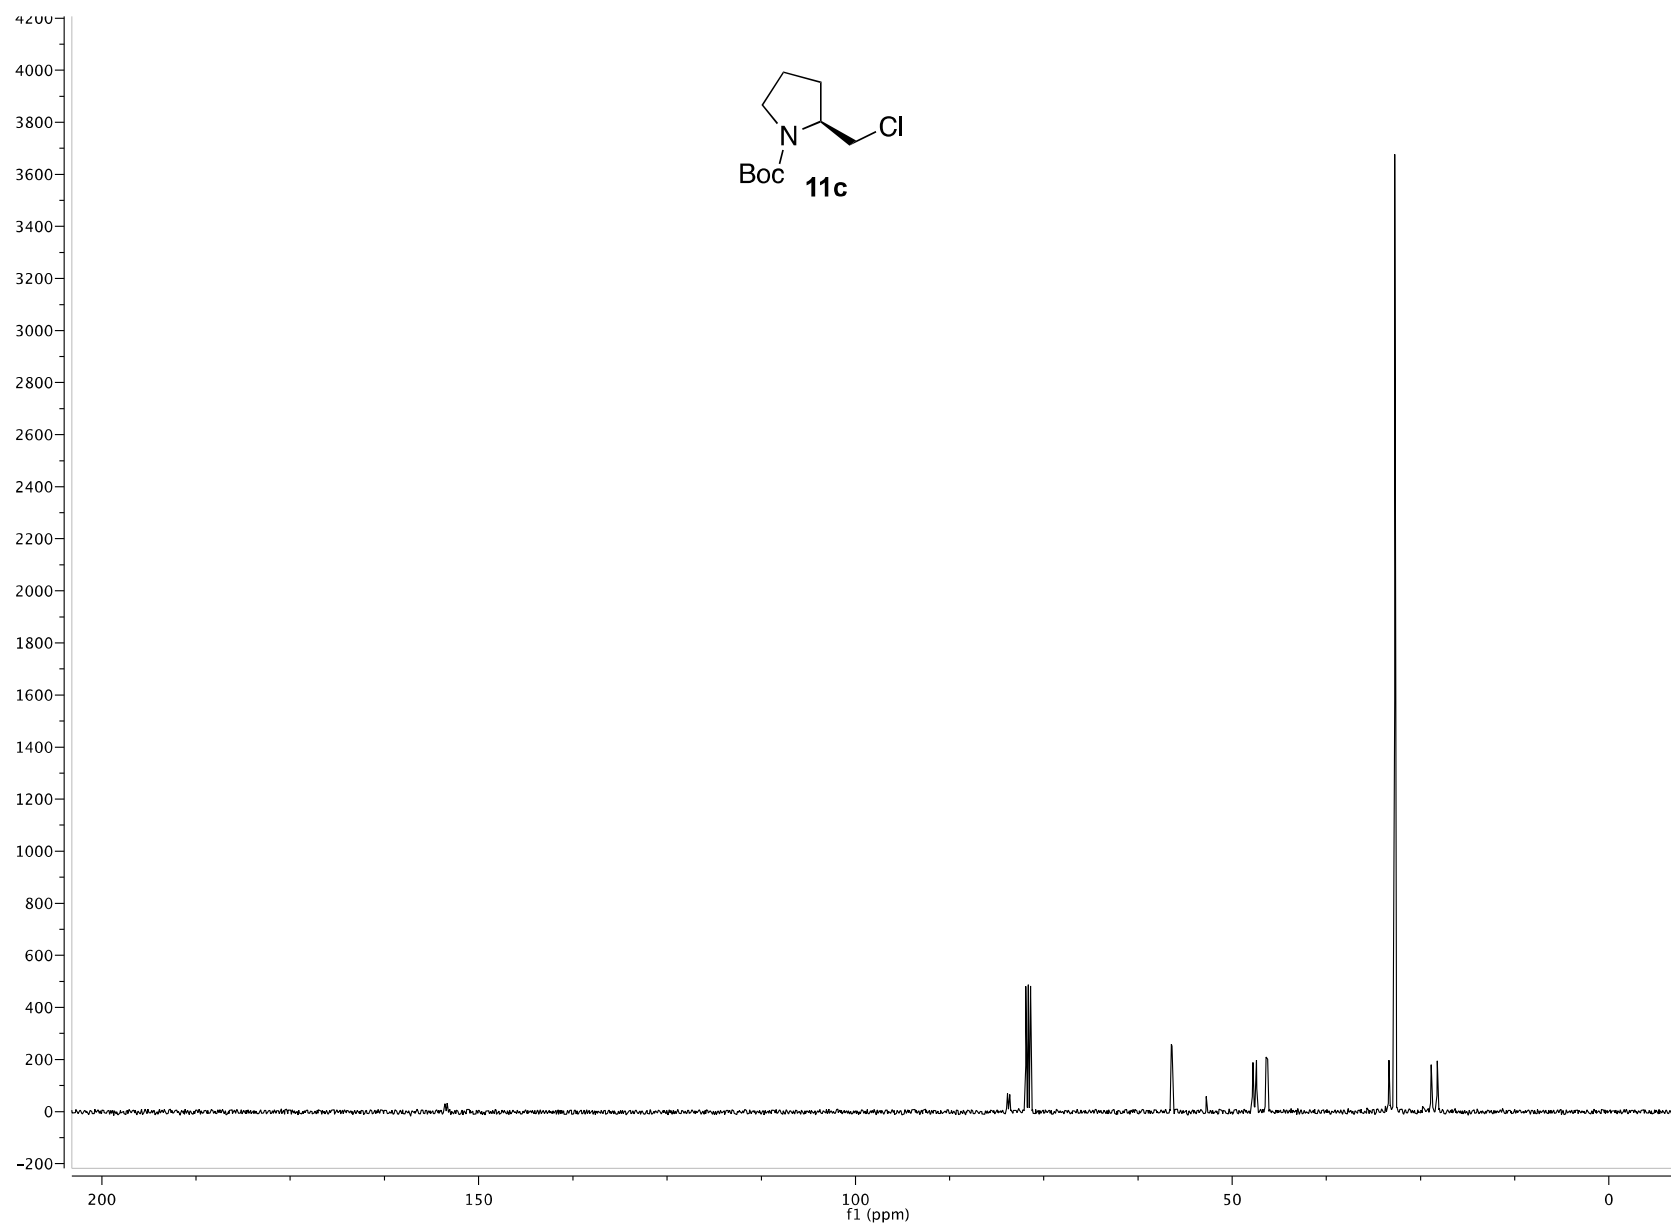

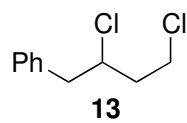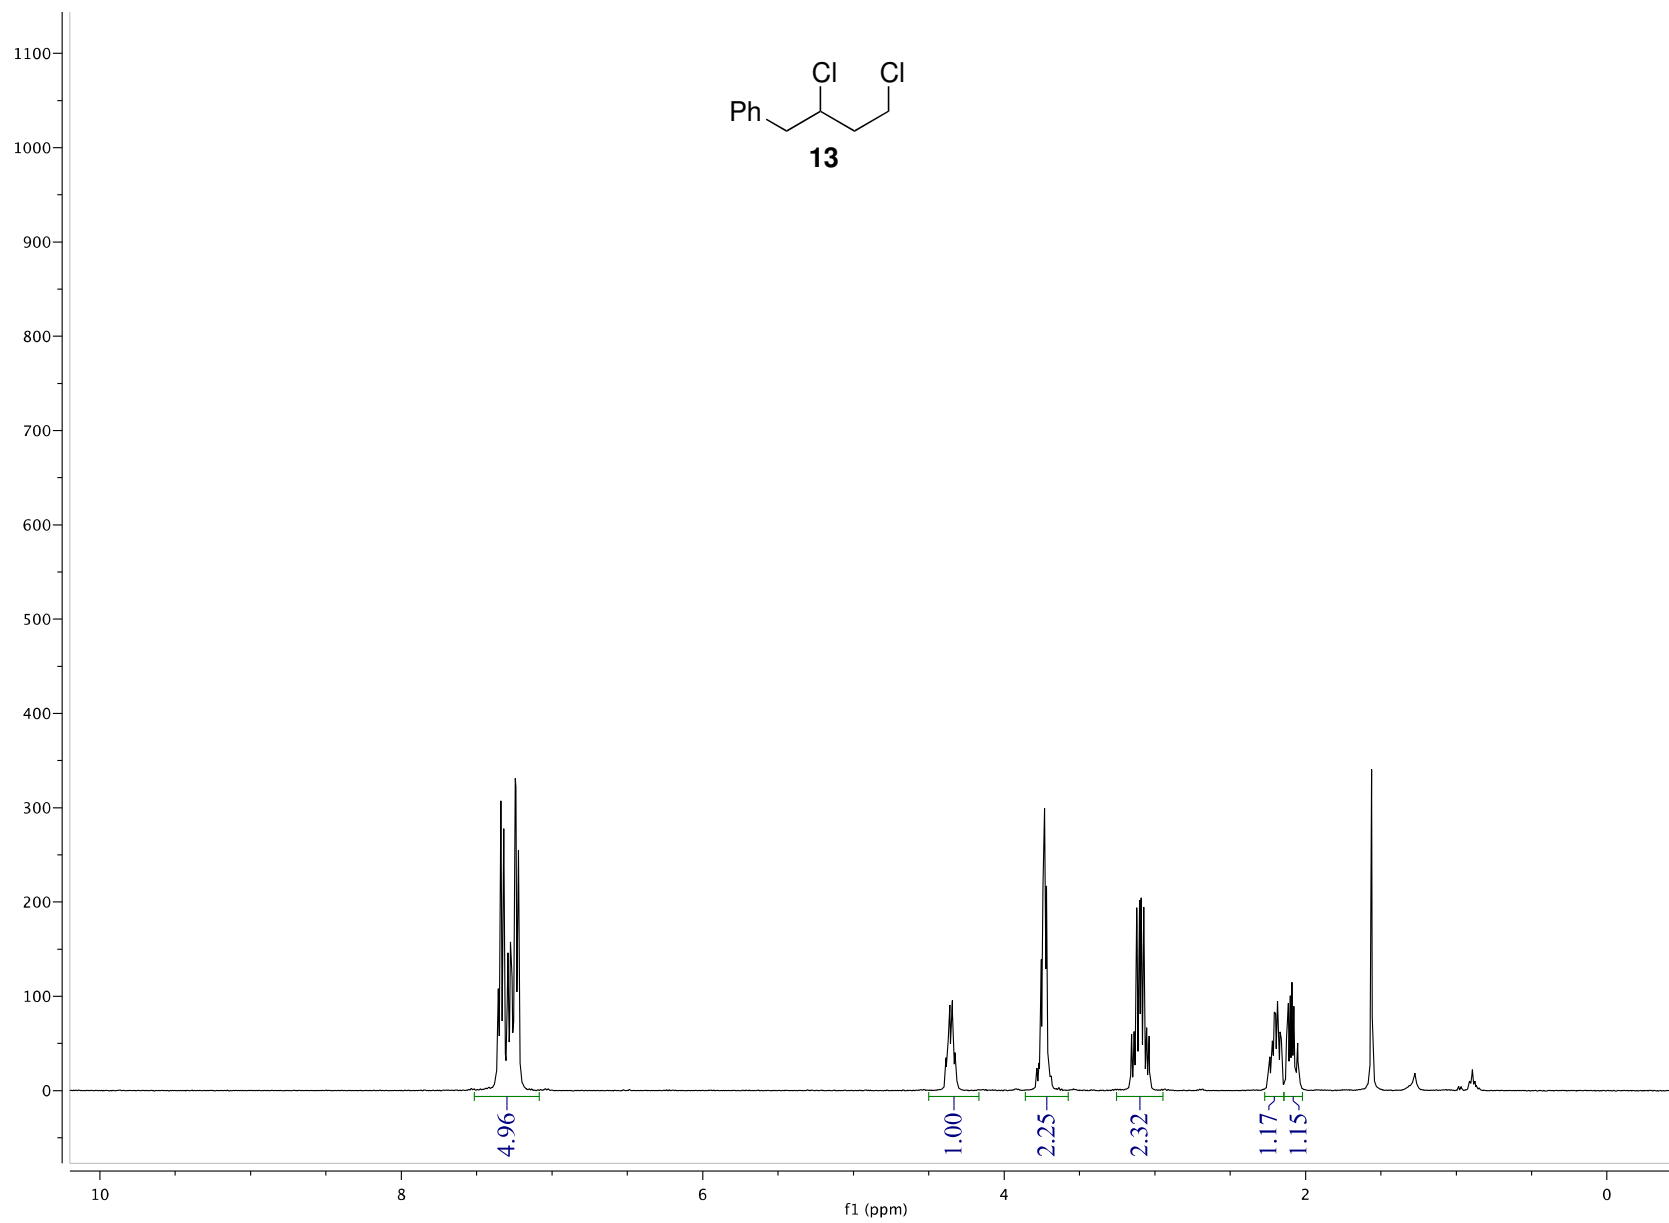

S-58

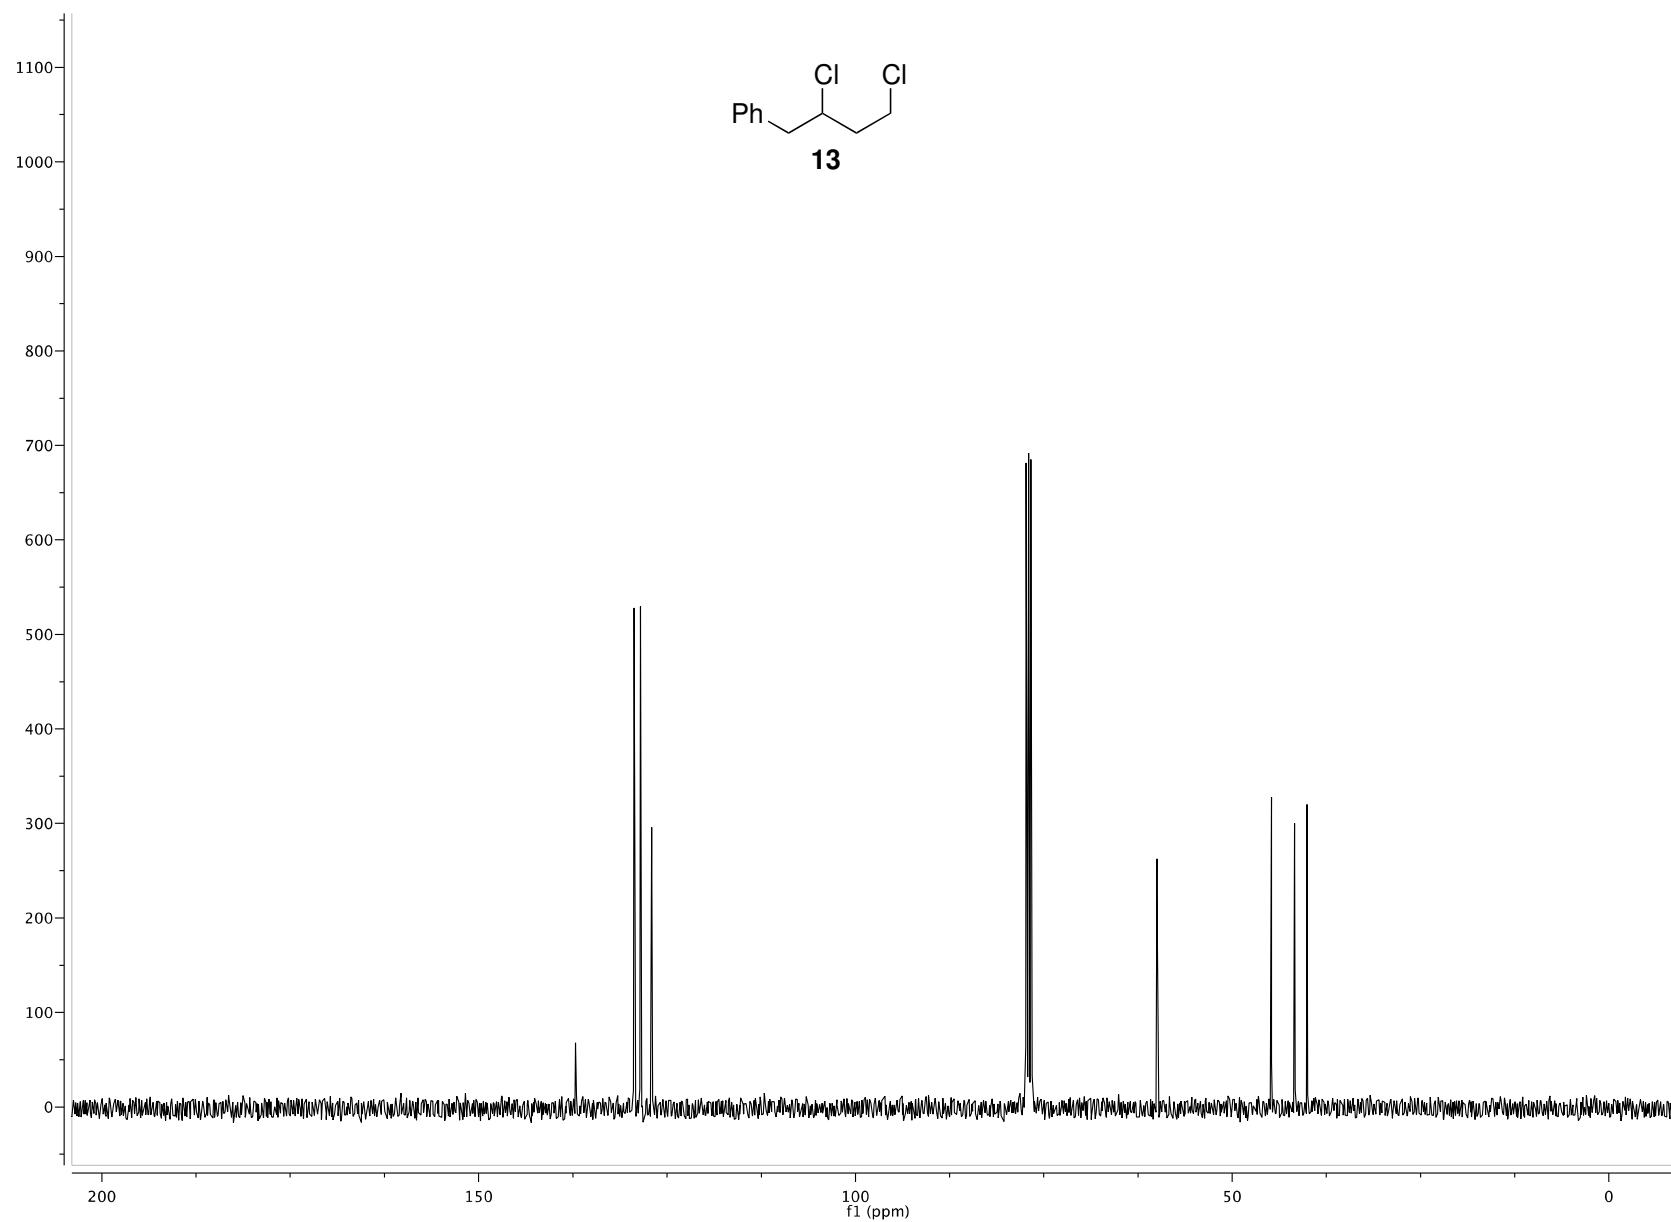

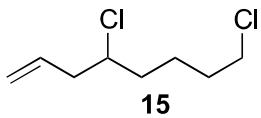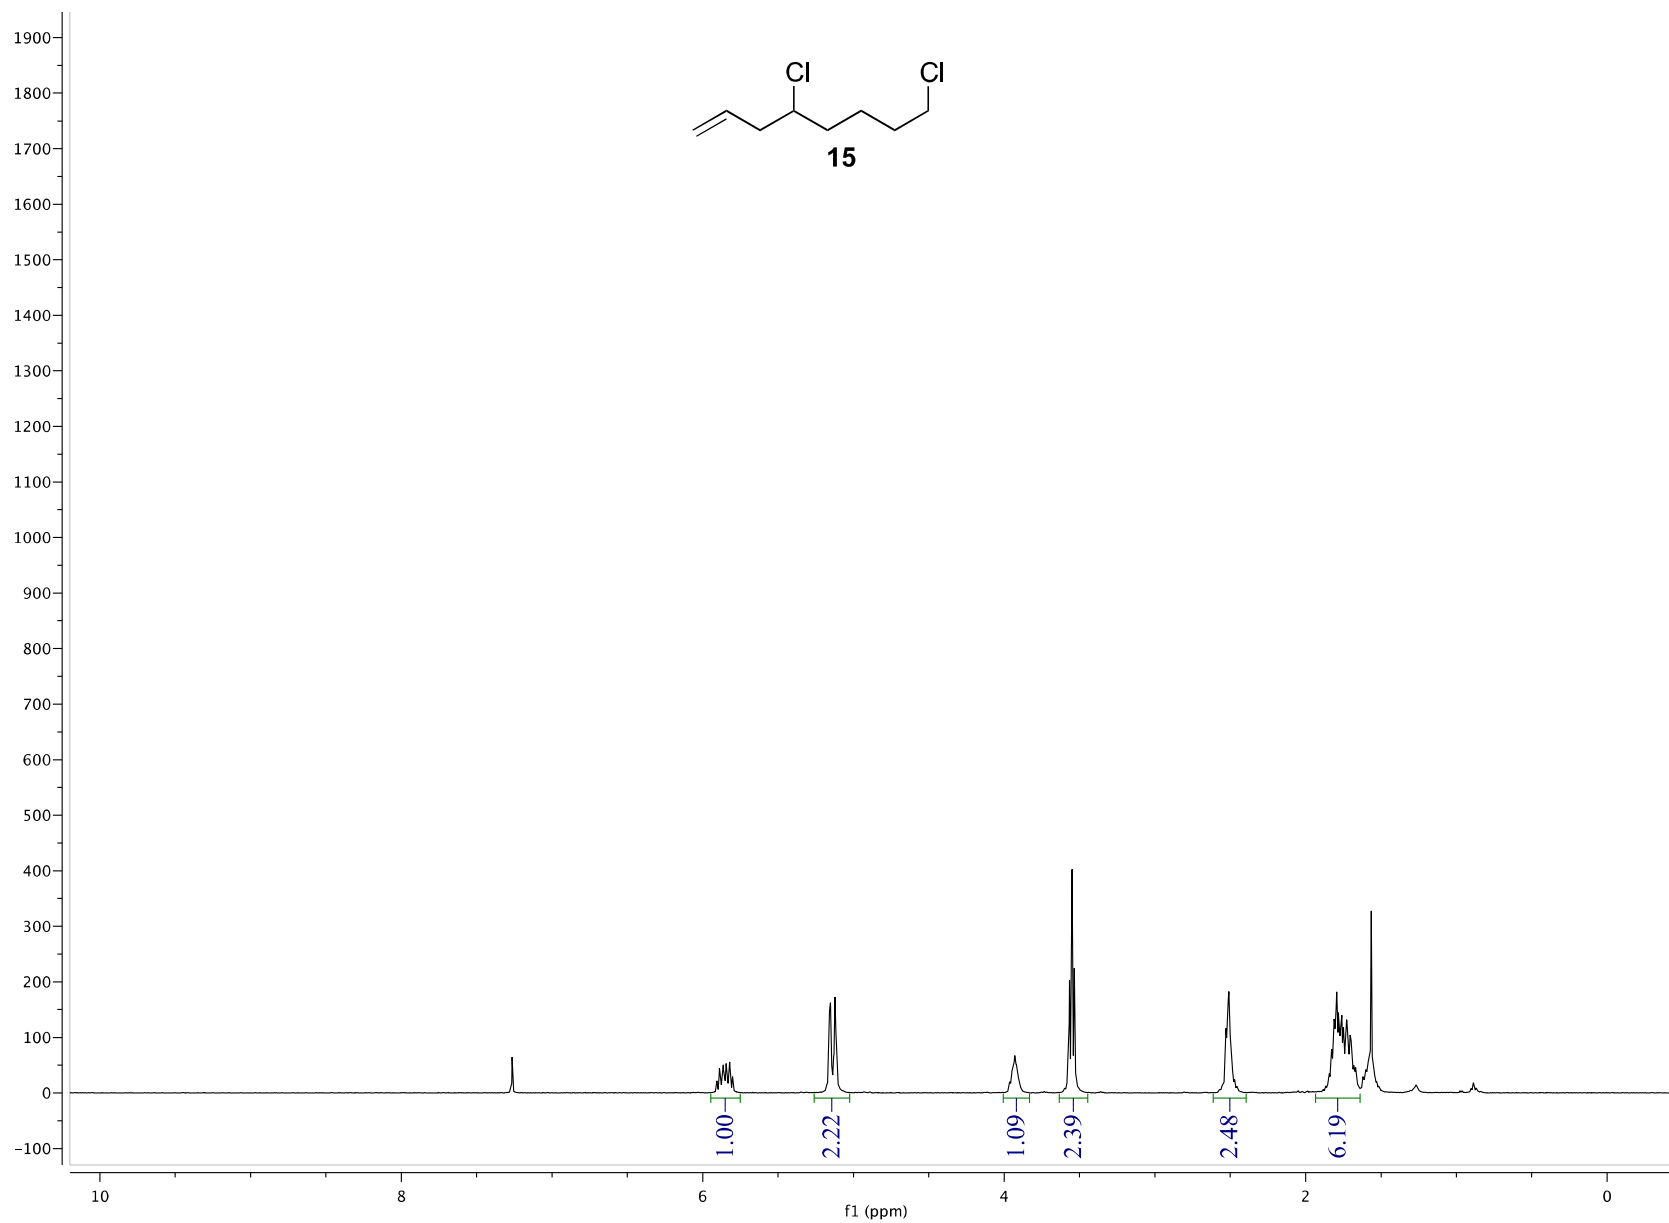

S-60

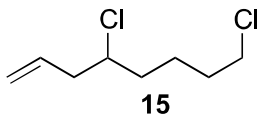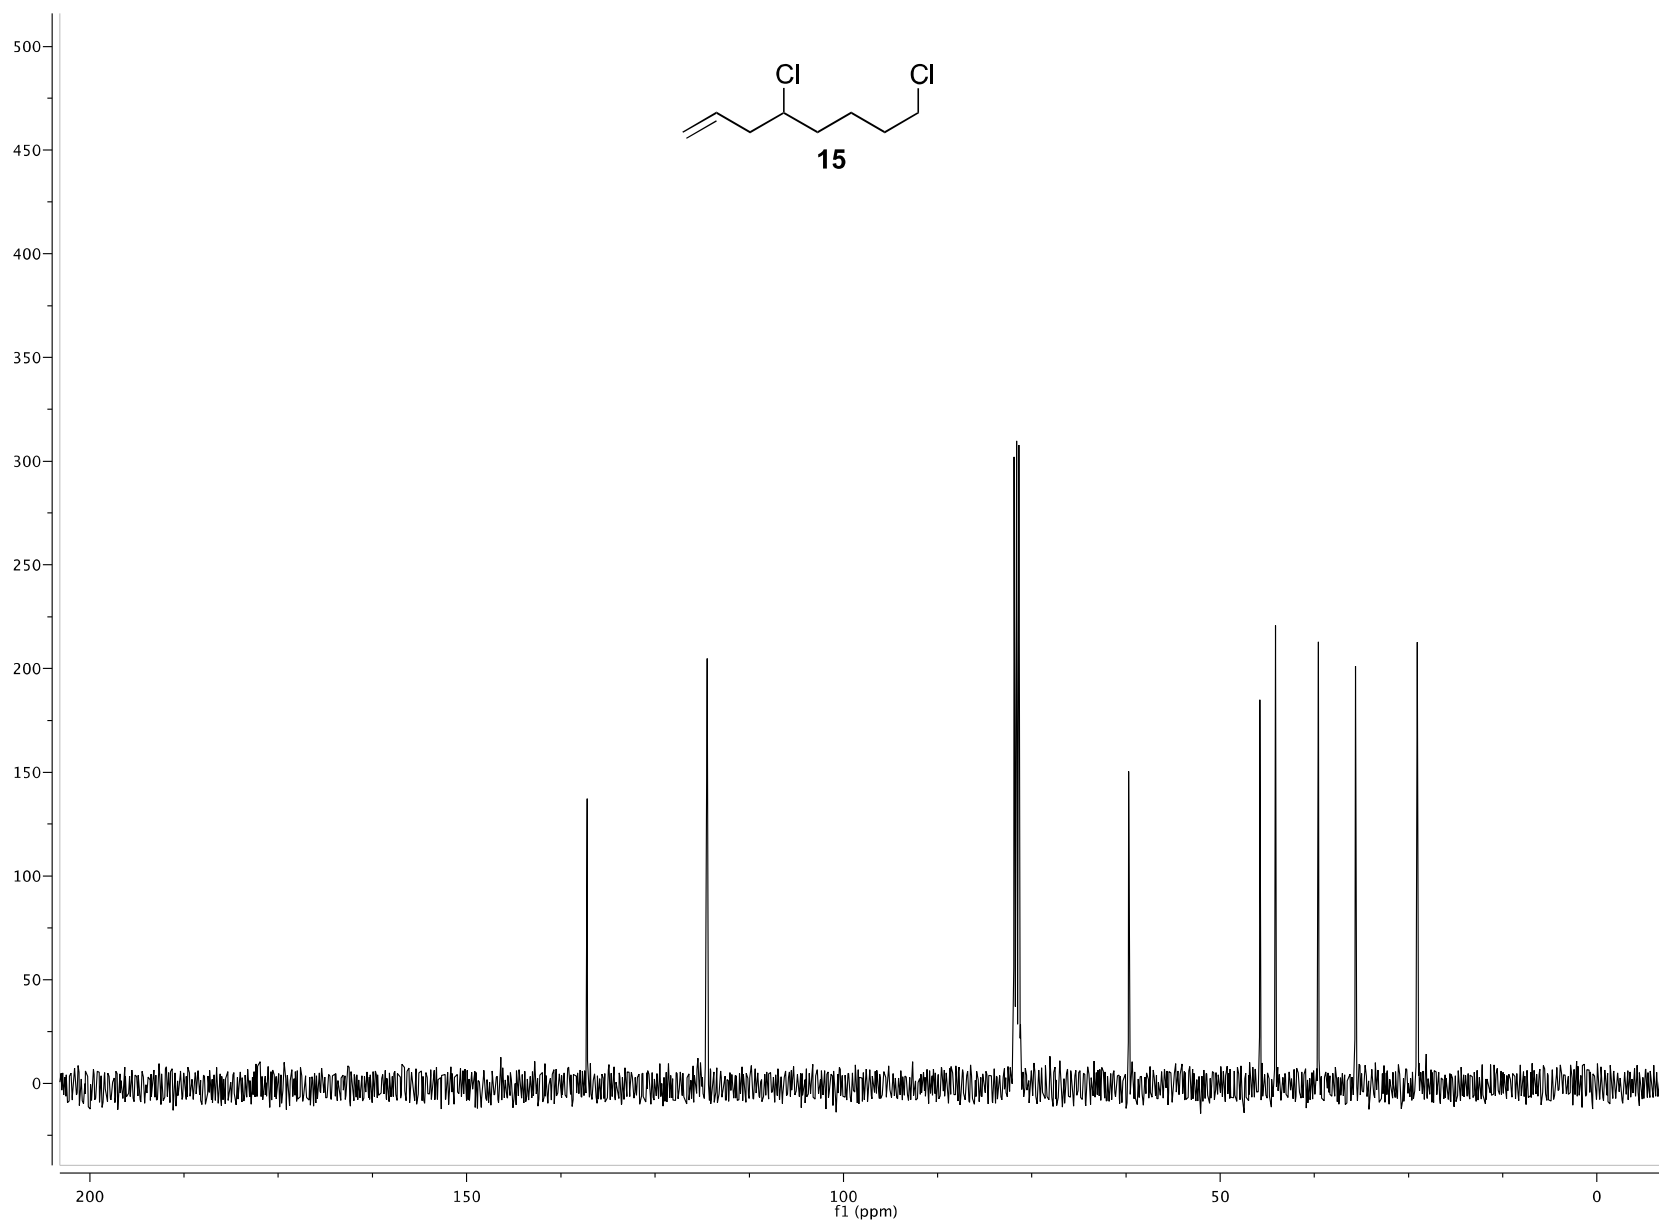

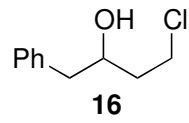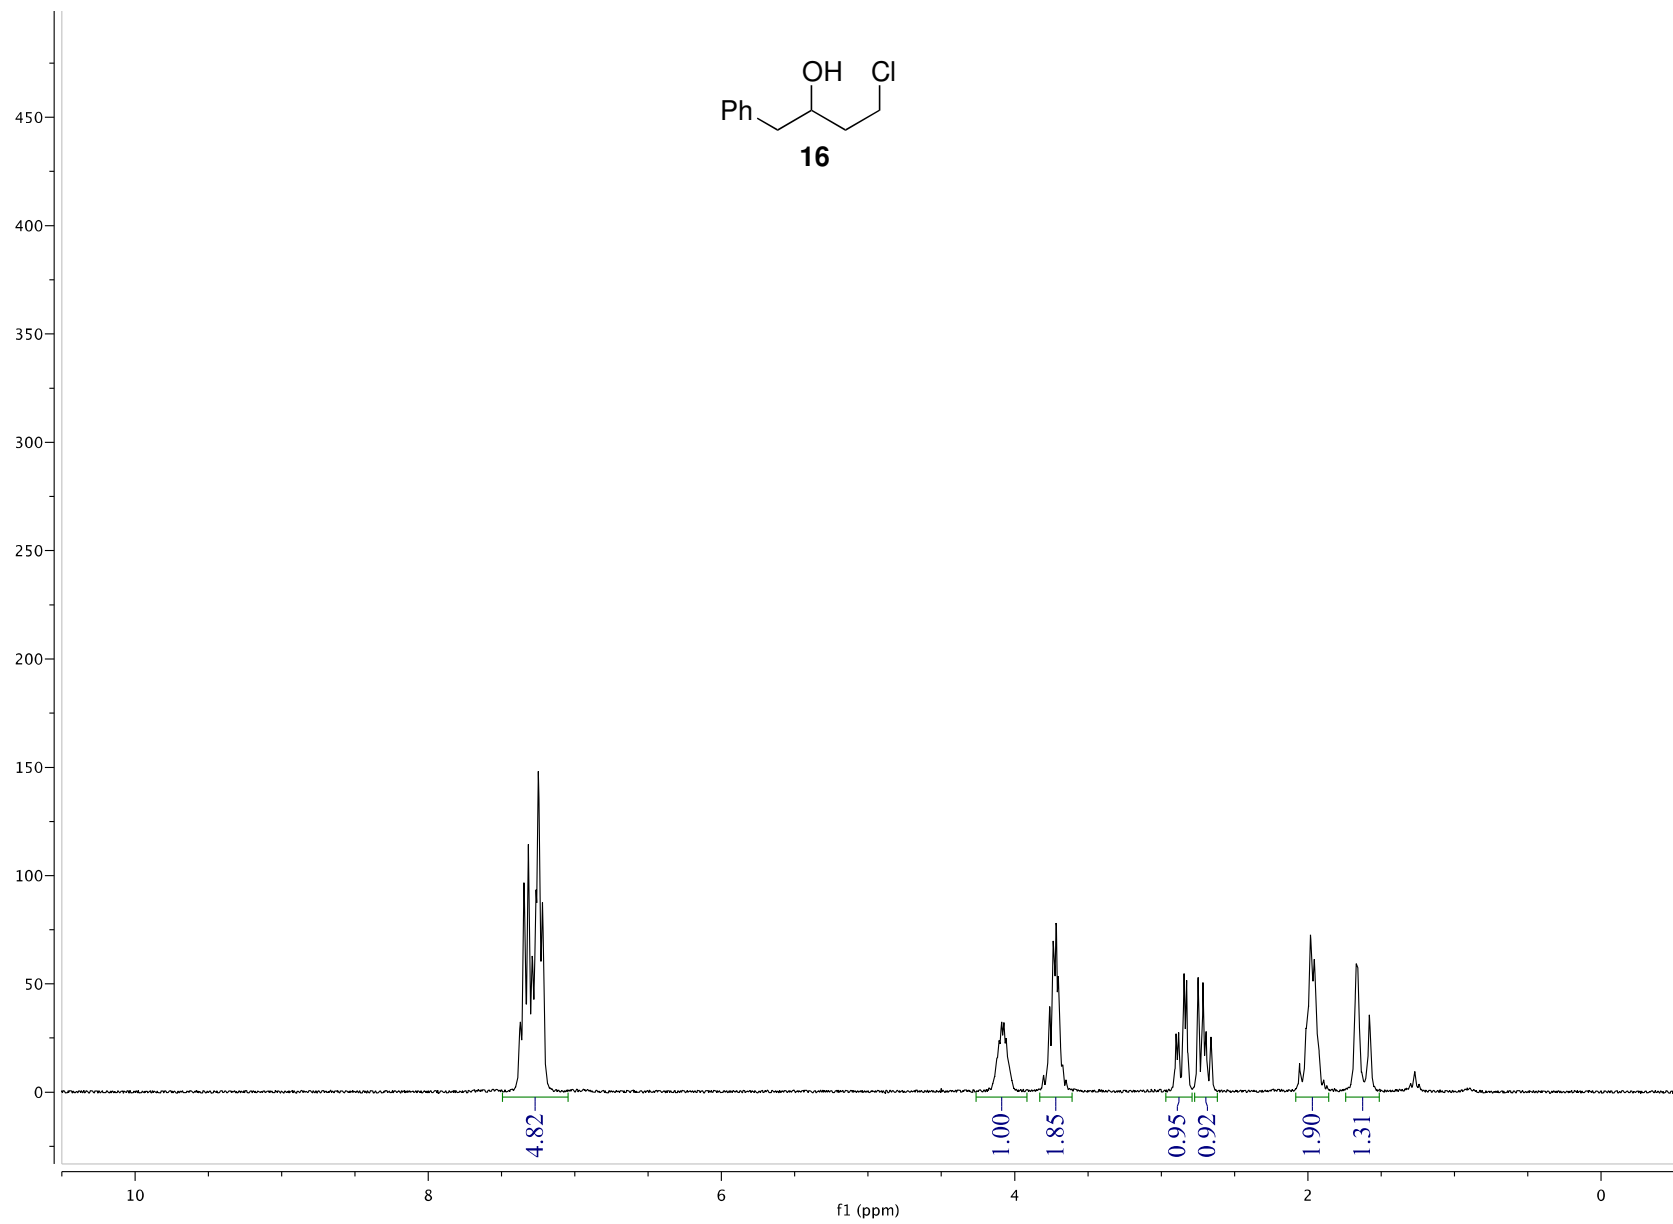

S-62

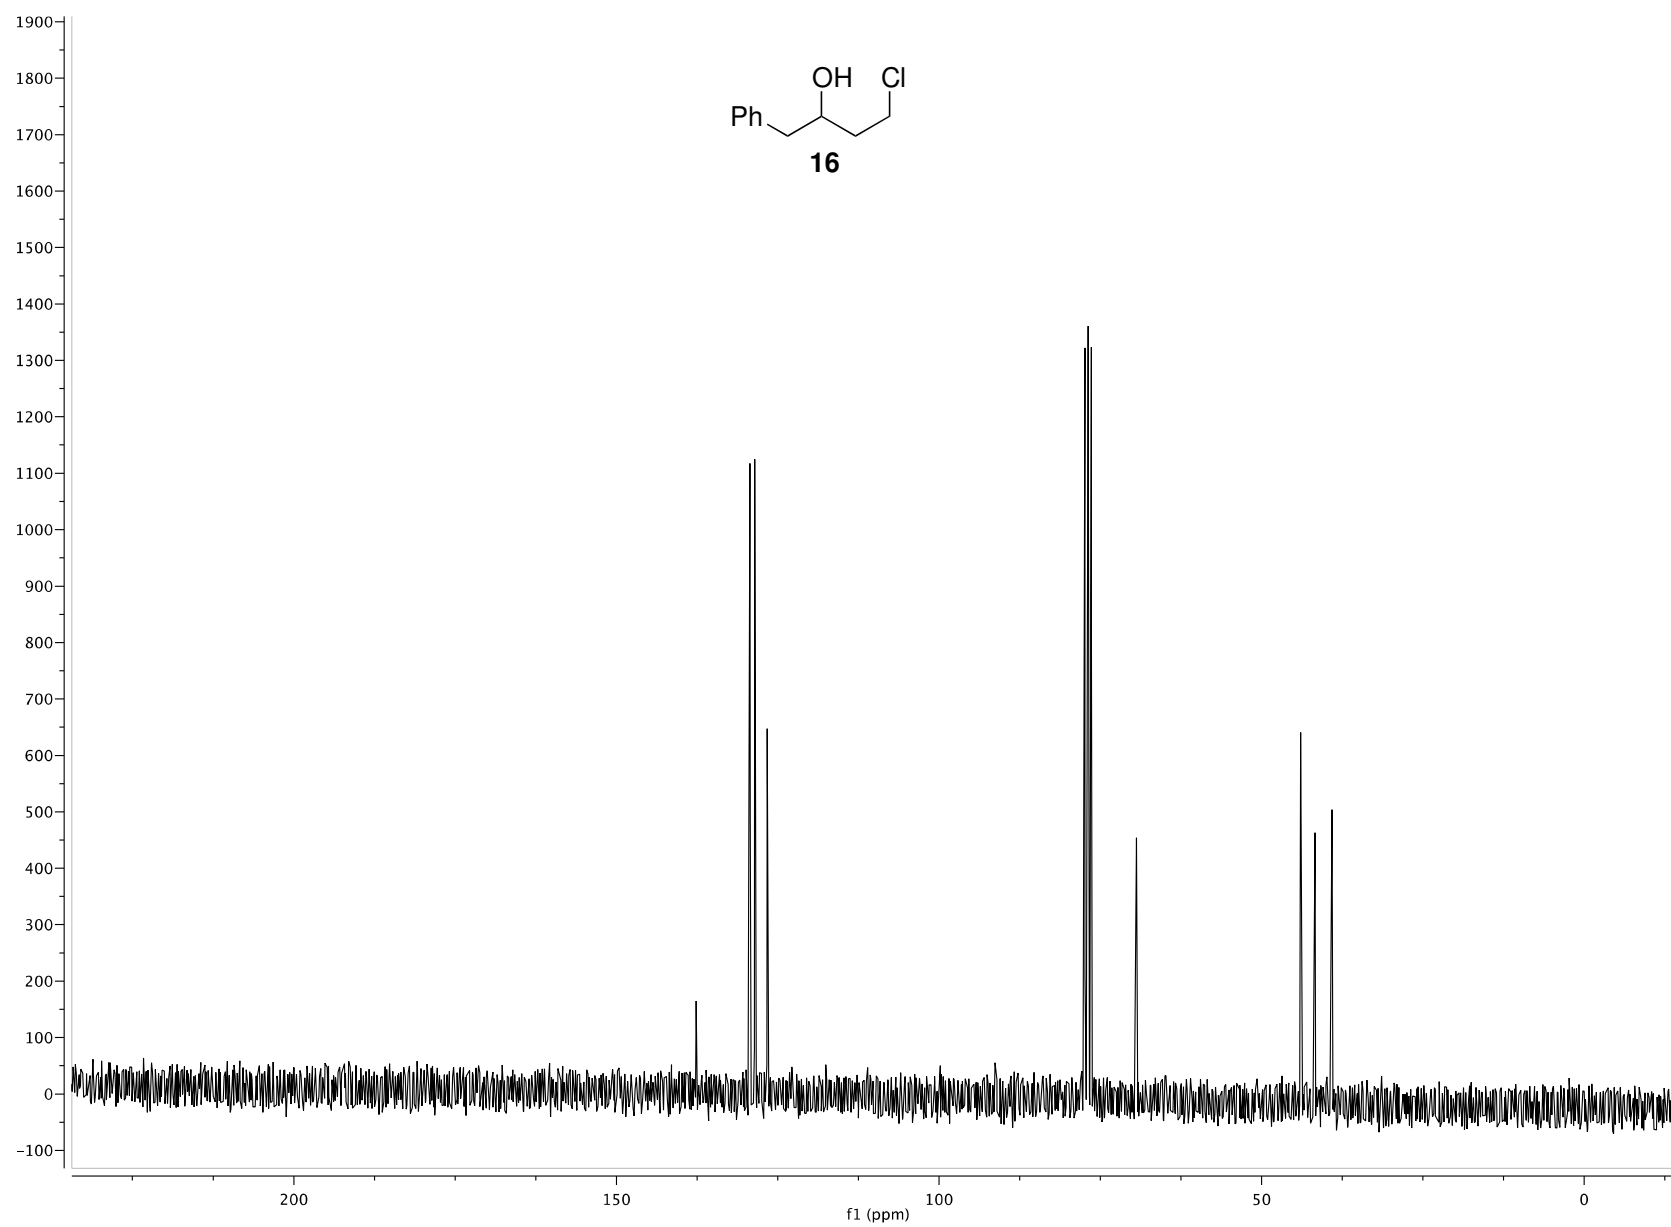

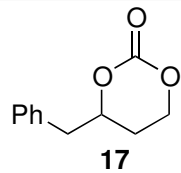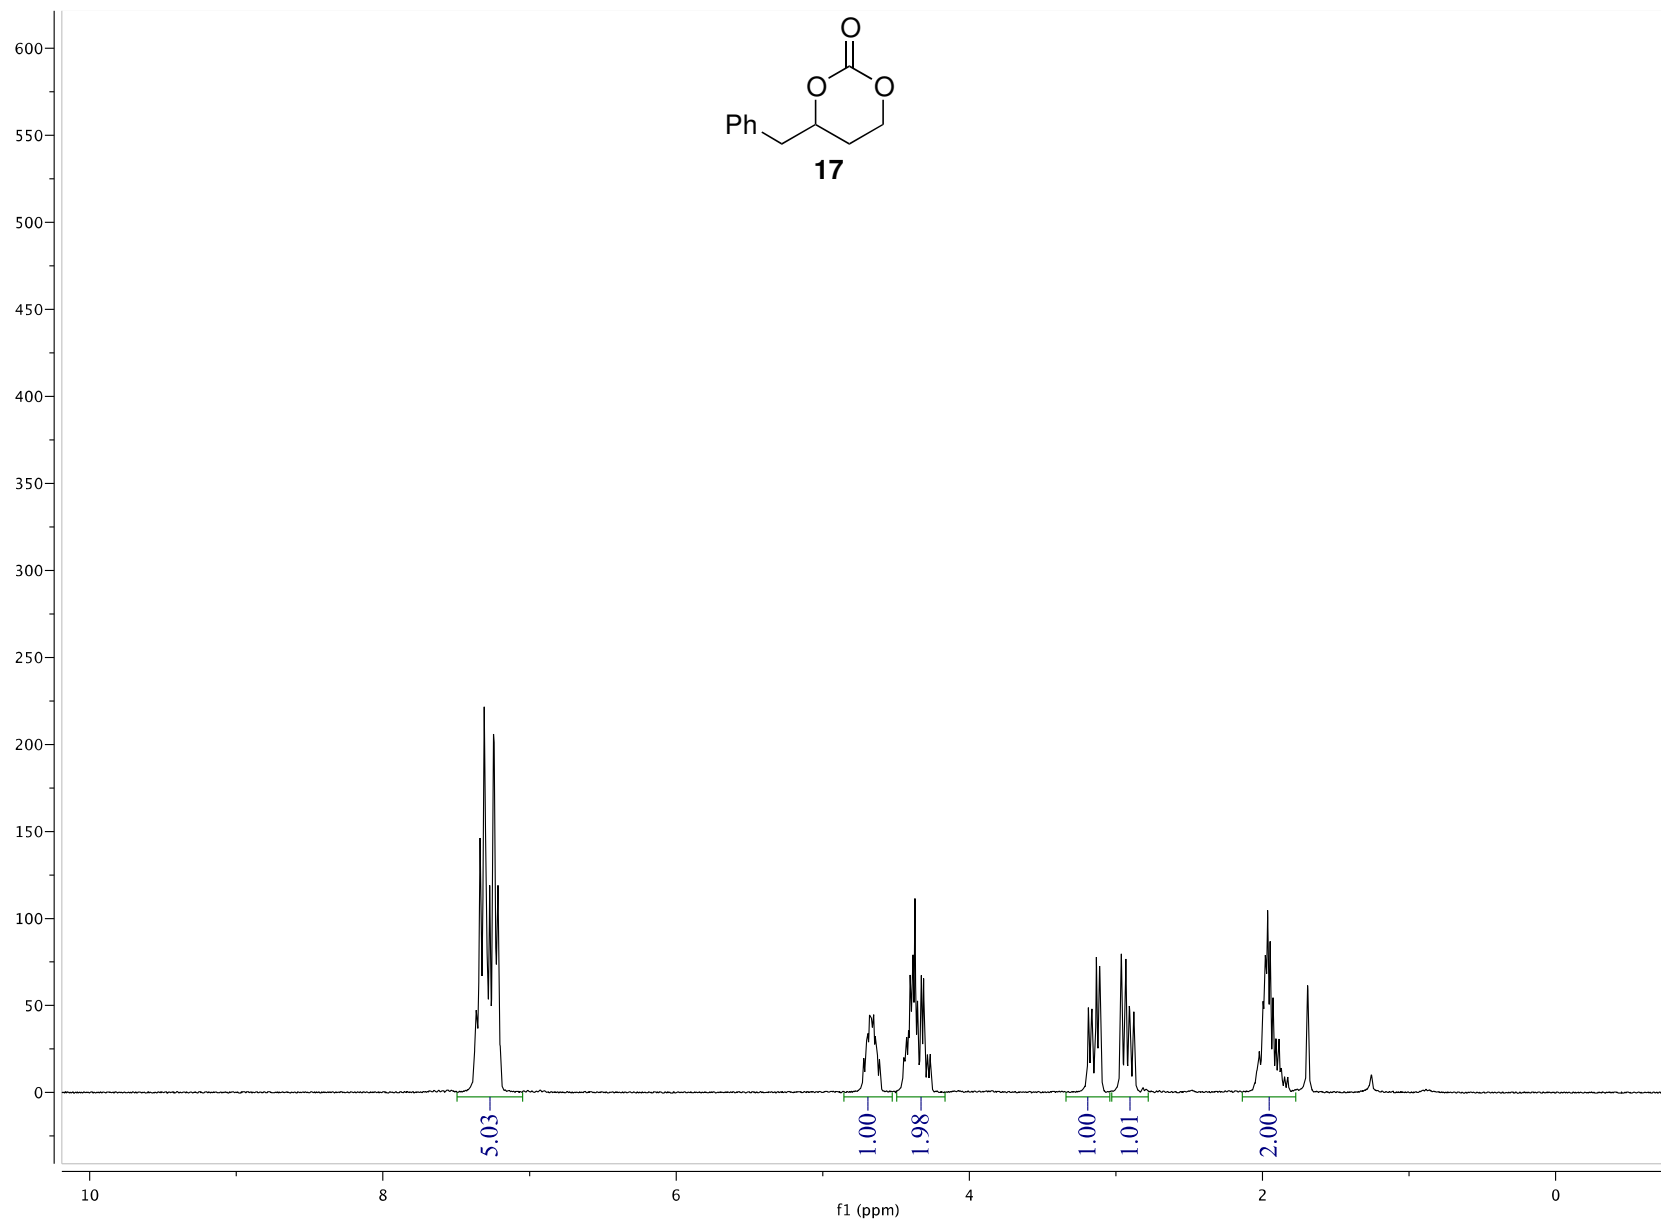



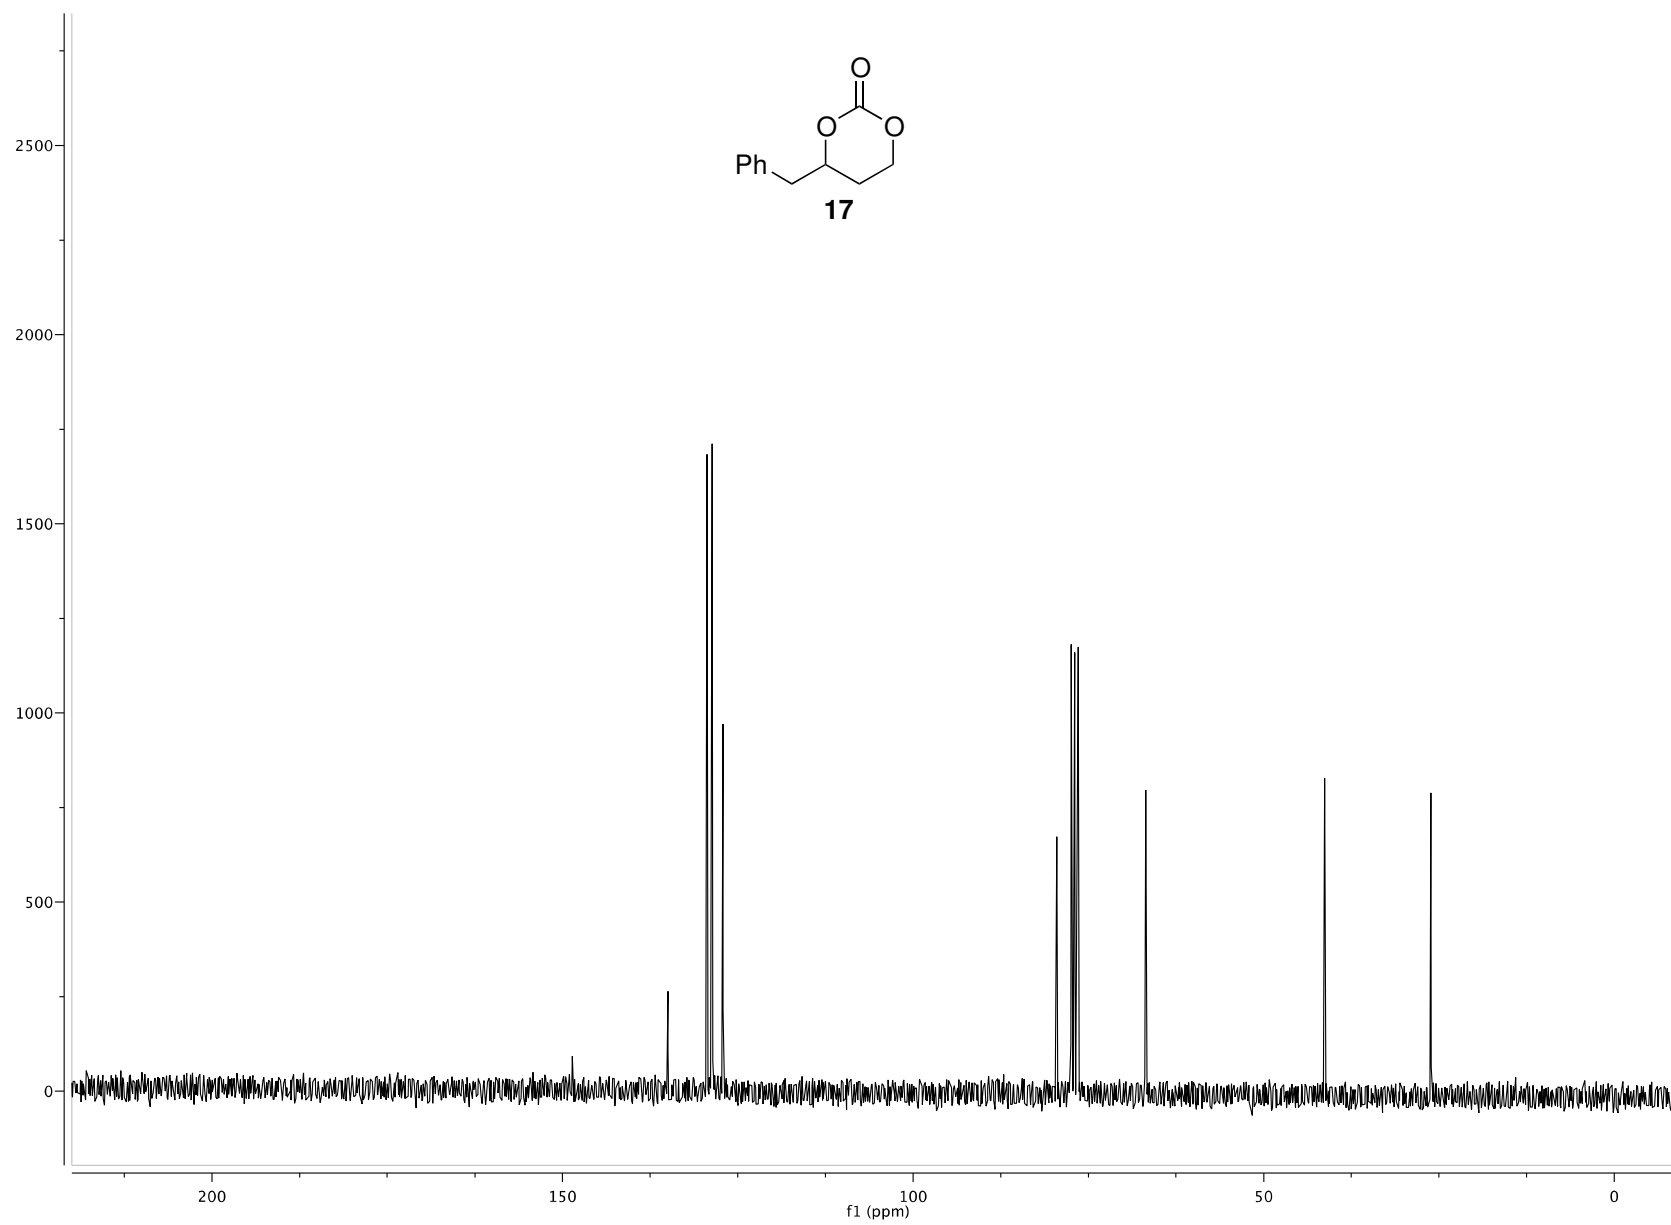

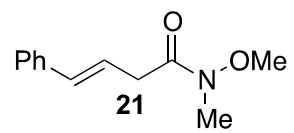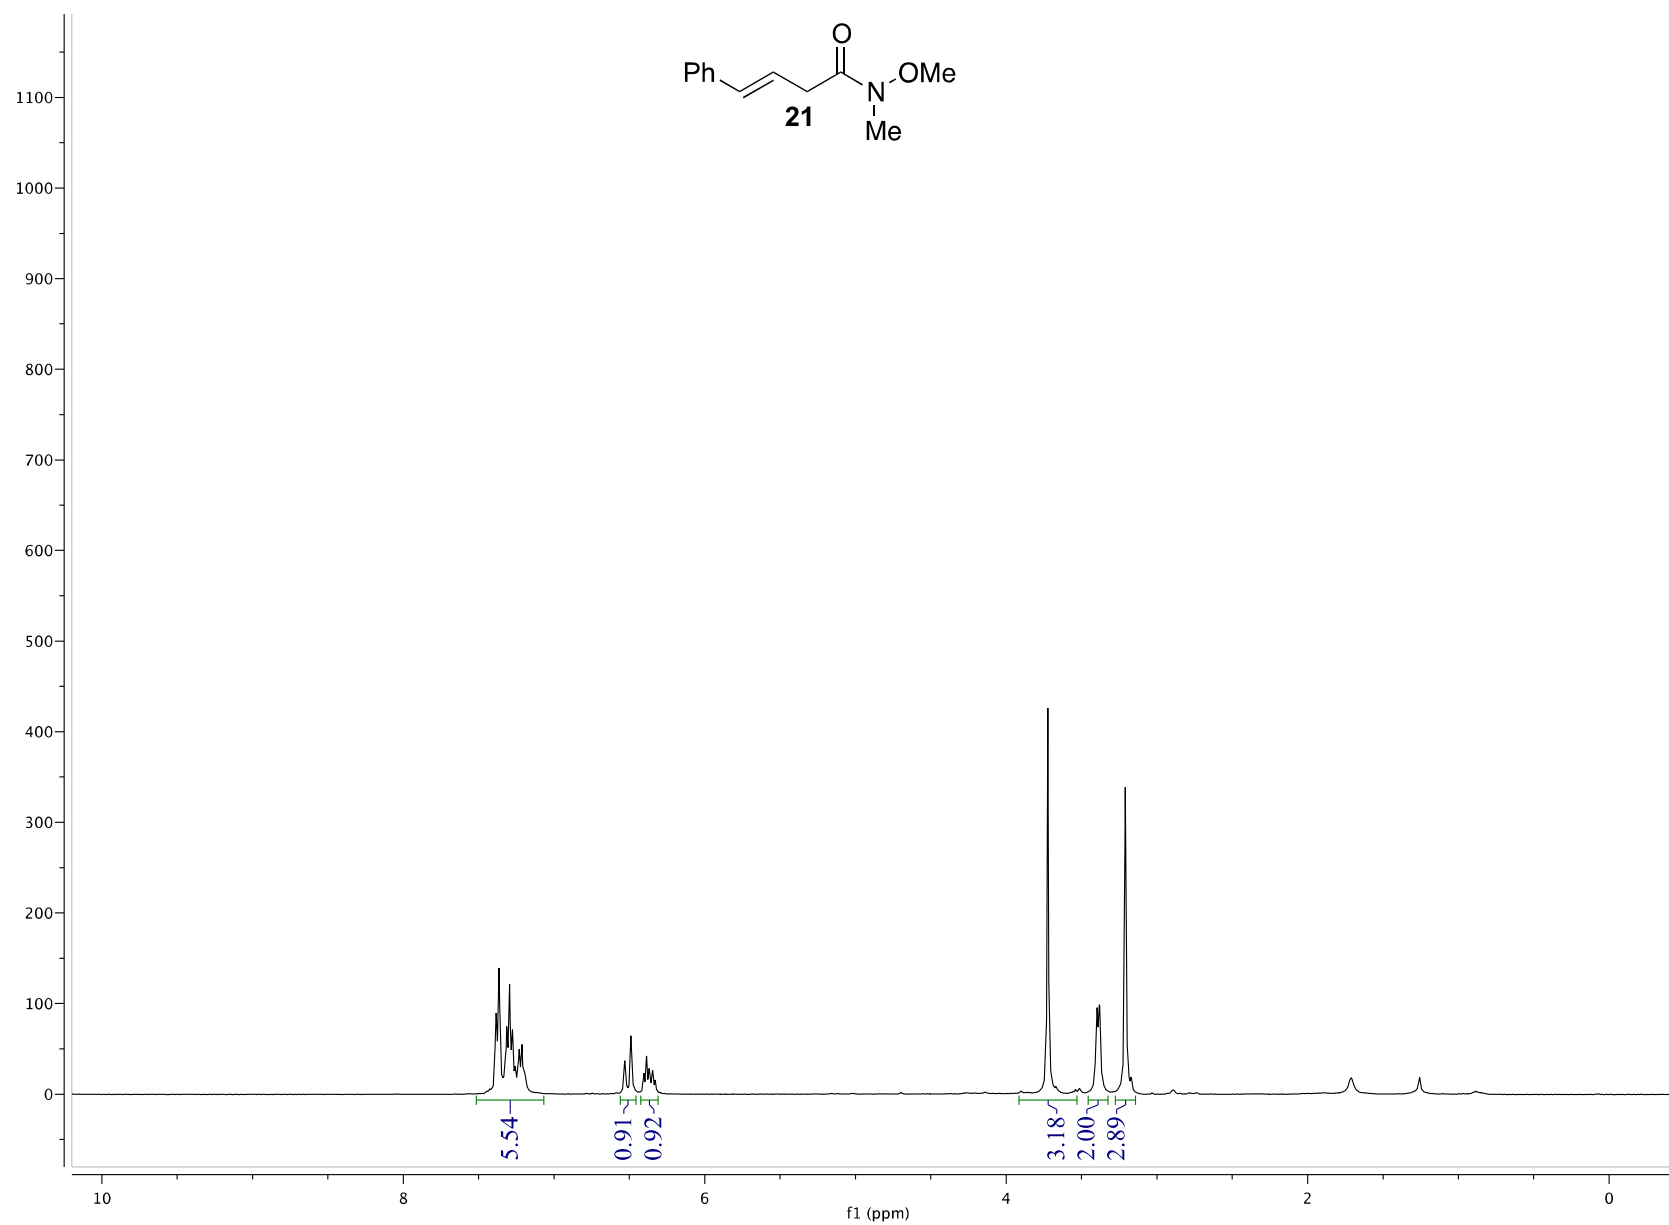

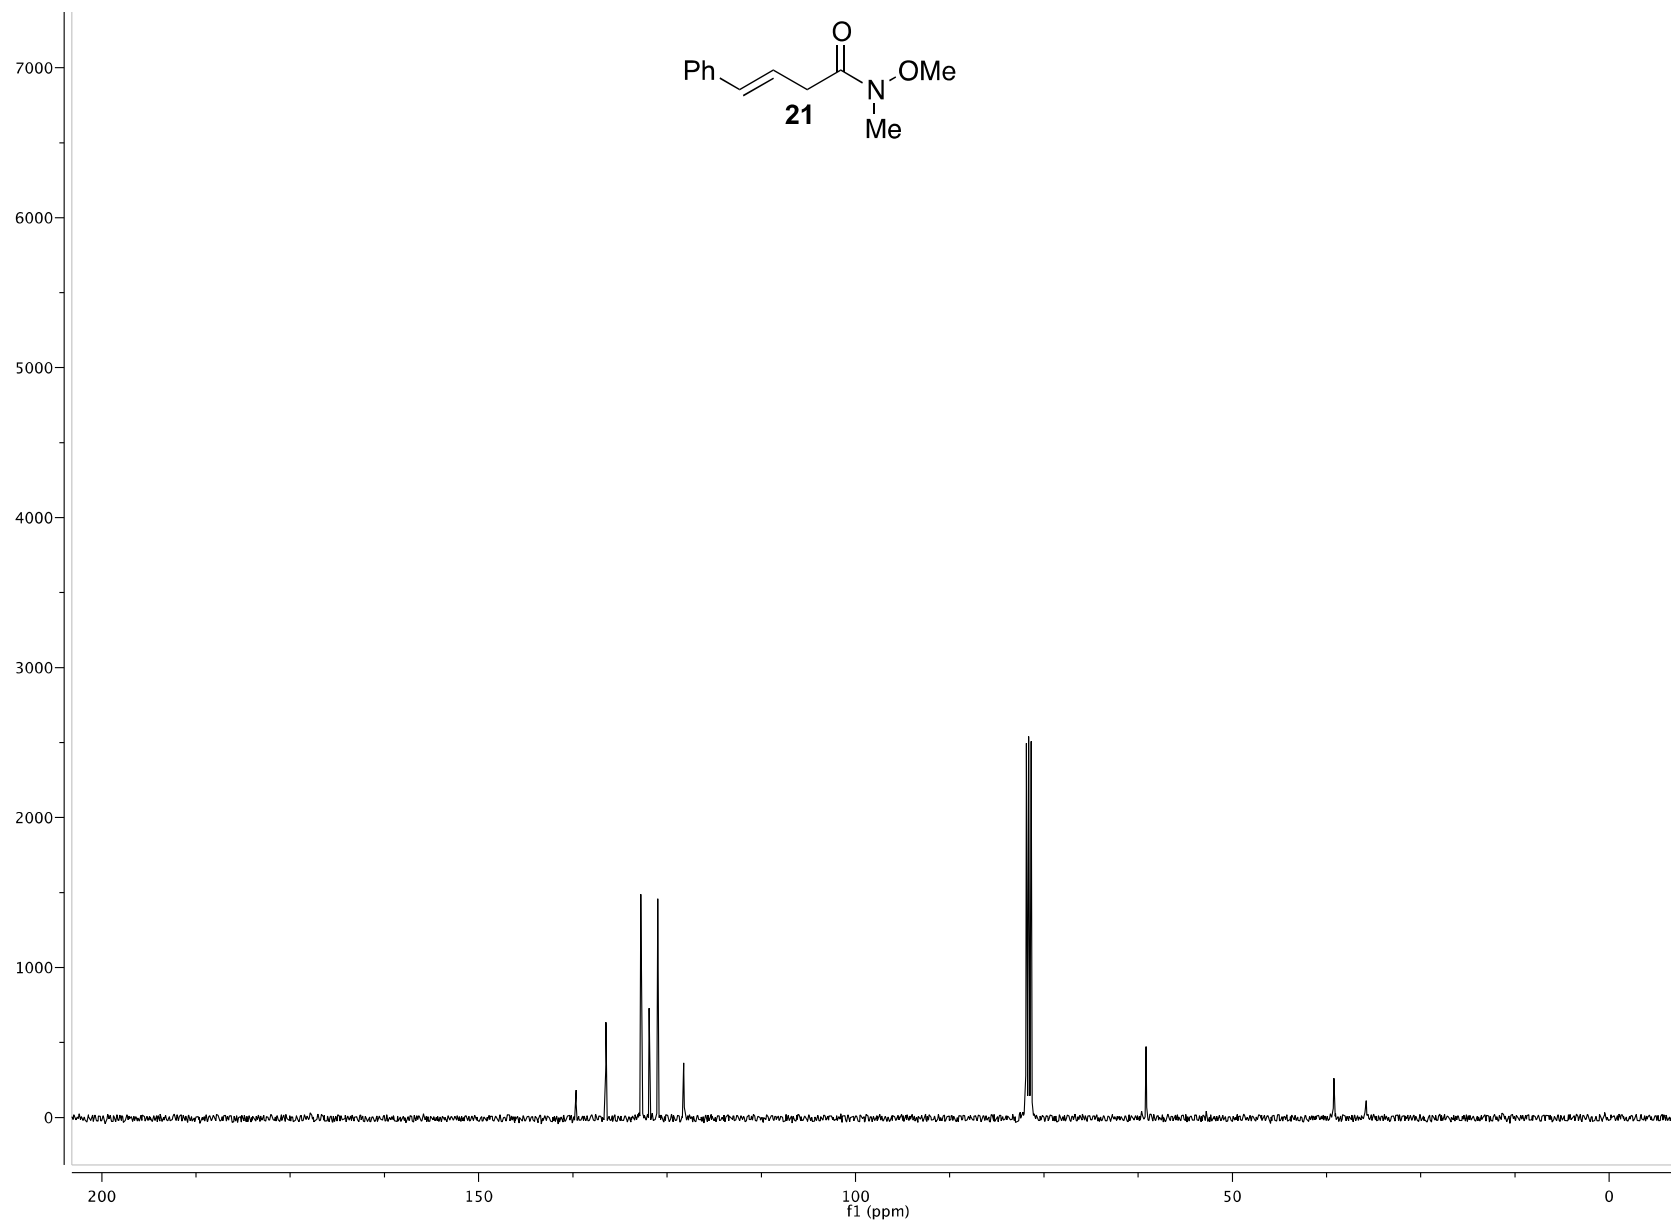

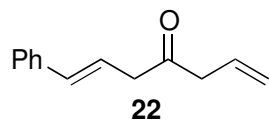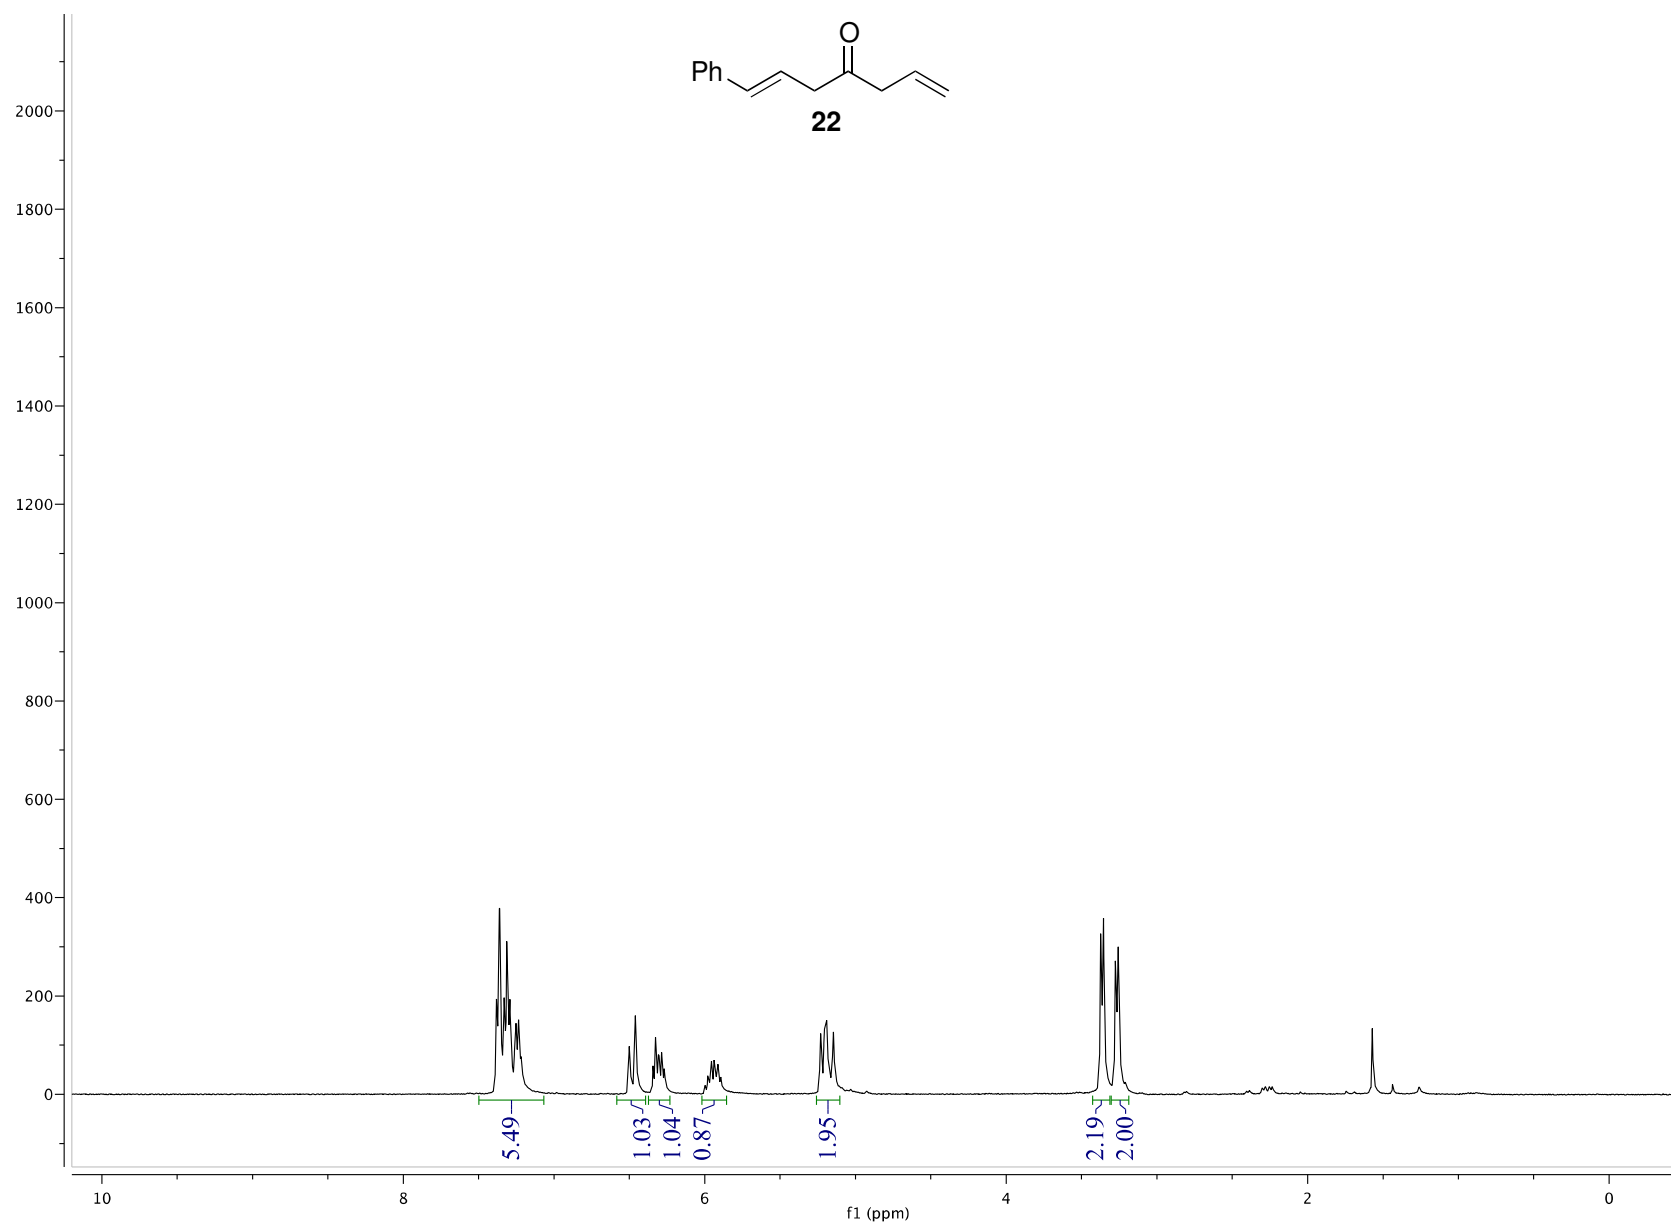

S-68

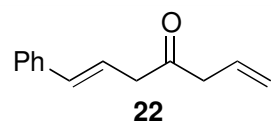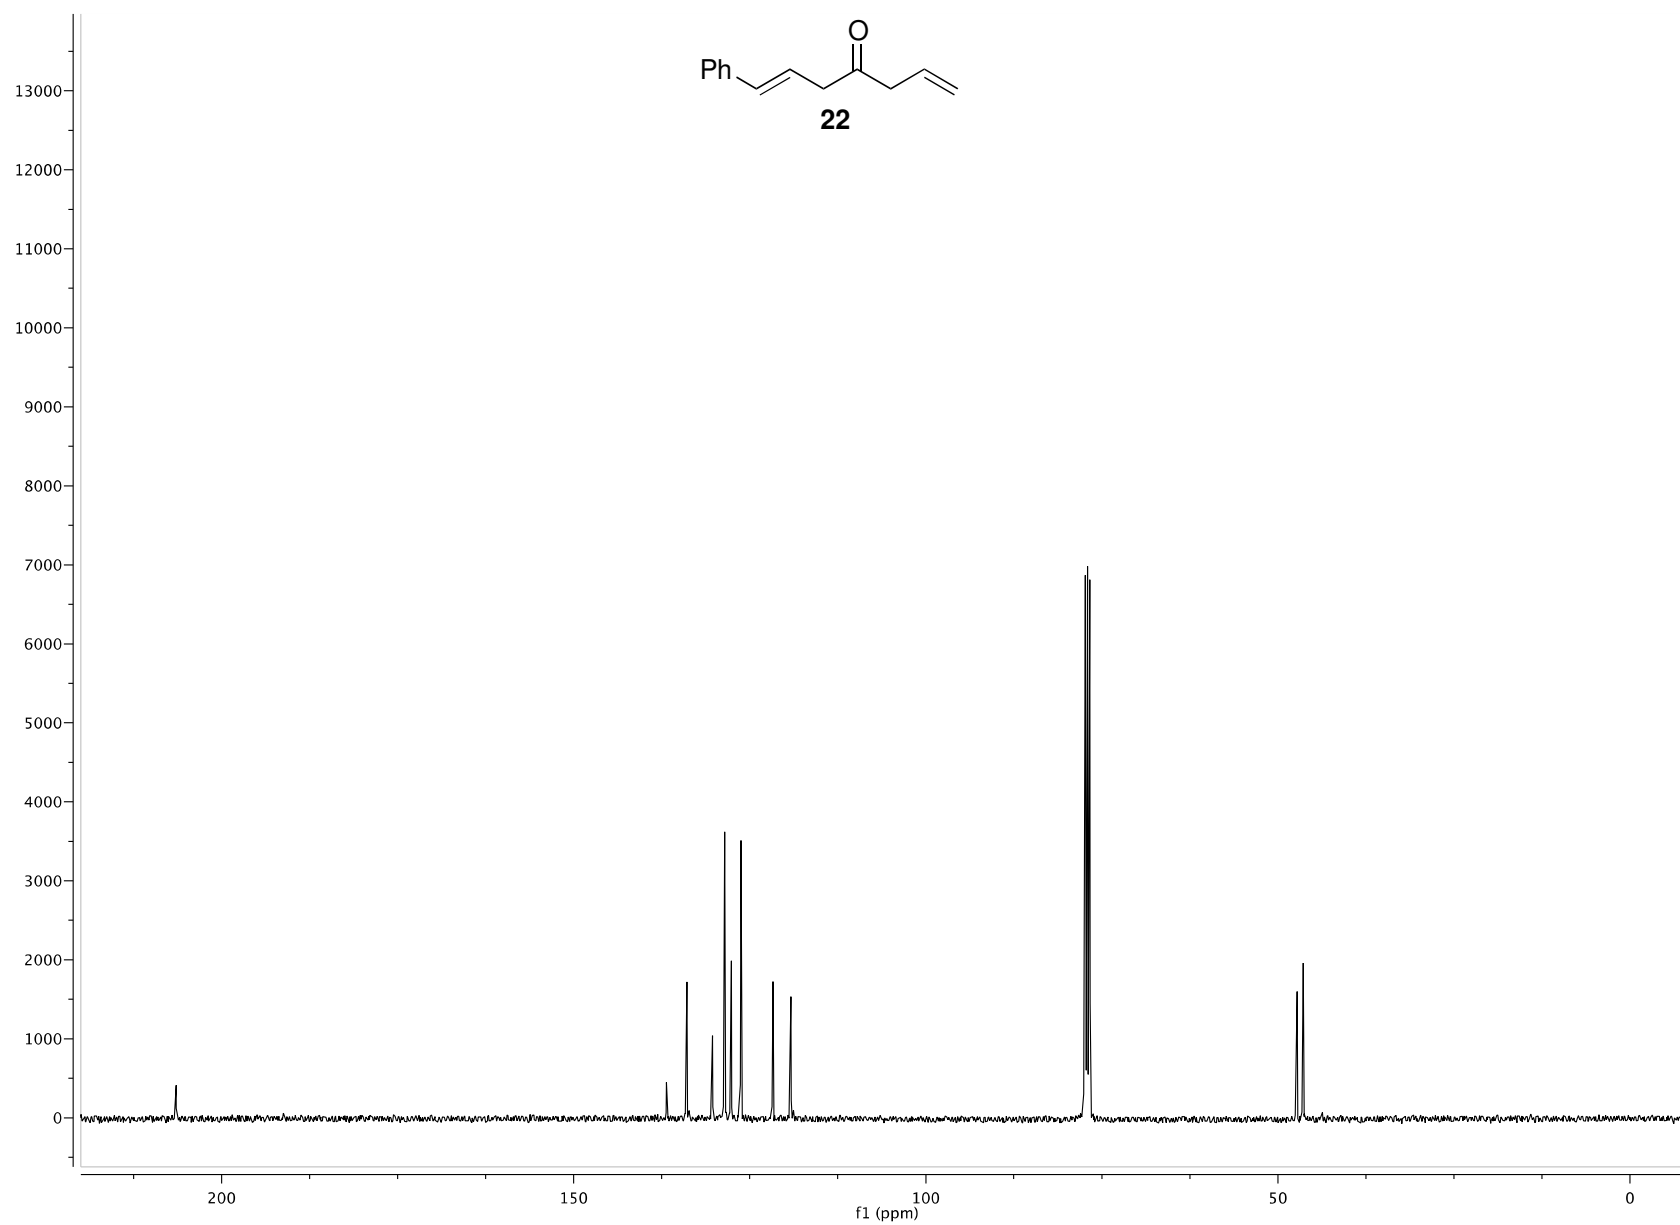

Supplement: NIHMS623700-supplement-NMR_GC-MS.pdf [file NIHMS623700-supplement-NMR_GC-MS.pdf]
